## **Novel lipid biomarkers for algal resistance to viral infection in the ocean**

Guy Schleyer<sup>1</sup>, Constanze Kuhlisch<sup>1</sup>, Carmit Ziv<sup>1,2</sup>, Shifra Ben-Dor<sup>3</sup>, Sergey Malitsky<sup>1,3</sup>,  
Daniella Schatz<sup>1</sup>, Assaf Vardi<sup>1\*</sup>

<sup>1</sup>Department of Plant and Environmental Sciences, Weizmann Institute of Science, Rehovot  
7610001, Israel

<sup>2</sup>Current: Department of Postharvest Science, Agricultural Research Organization, Volcani  
Center, Rishon LeZion 7505101, Israel

<sup>3</sup>Department of Life Sciences Core Facilities, Weizmann Institute of Science, Rehovot  
7610001, Israel

\*Corresponding author: [assaf.vardi@weizmann.ac.il](mailto:assaf.vardi@weizmann.ac.il)

## Abstract

Marine viruses play a key role in regulating phytoplankton populations, greatly affecting the biogeochemical cycling of major nutrients in the ocean. Resistance to viral infection has been reported for various phytoplankton species under laboratory conditions. Nevertheless, the occurrence of resistant cells in natural populations is underexplored due to the lack of sensitive tools to detect these rare phenotypes. Consequently, our current understanding of the ecological importance of resistance and its underlying mechanisms is limited. Here, we sought to discover lipid biomarkers for the resistance of the bloom-forming alga *Emiliana huxleyi* to its specific virus, *E. huxleyi* virus (EhV). We identified novel glycosphingolipids (GSLs) that characterize resistant *E. huxleyi* strains by applying an untargeted lipidomics approach. Further, we detected these lipid biomarkers in *E. huxleyi* isolates that were recently collected from *E. huxleyi* blooms and used them to detect resistant cells in the demise phase of an open ocean *E. huxleyi* bloom. Lastly, we show that the GSL composition of *E. huxleyi* cultures that recover following infection and gain resistance to the virus resembles that of resistant strains. These findings highlight the metabolic plasticity and co-evolution of the GSL biosynthetic pathway and underscore its central part in this host-virus arms race.

## Introduction

Viruses are the most abundant biological entities in the marine environment and serve as major evolutionary and biogeochemical drivers in the oceans<sup>1-4</sup>. Algae-infecting viruses are estimated to turn over a substantial portion of the photosynthetically-fixed carbon, thus fueling microbial food webs, short-circuiting carbon transfer to higher trophic levels and promoting its export to the deep sea<sup>5-7</sup>. Recent developments allow to better quantify infected cells in the natural environment<sup>8-13</sup>, yet studying host-virus dynamics in natural populations<sup>14</sup> remains a major challenge for our understanding of the possible phenotypic outcomes of viral infection.

The ongoing evolutionary arms race between algae and their viruses leads to diverse defense strategies, supported by continuous genetic and phenotypic adaptations of the algal cells<sup>15-17</sup>. Resistance to viral infection has been reported for several algal species, both as isolates from natural populations and as sub-populations that emerge following infection under laboratory conditions<sup>16,18-22</sup>. Nevertheless, the prevalence of resistant phenotypes in nature is currently unknown, as we lack sensitive tools to detect resistant cells in mixed populations, hindering our understanding of their ecological importance.

The cosmopolitan alga *E. huxleyi* and its specific virus, *E. huxleyi* virus (EhV), are an attractive model system to study host-virus interactions. *E. huxleyi* forms vast annual blooms in the ocean that play an important role in regulating the global biogeochemical cycling of carbon and sulfur<sup>23-26</sup> and are routinely infected and terminated by EhV<sup>27-30</sup>. Laboratory-based studies revealed that viral infection leads to profound rewiring of the *E. huxleyi* metabolism, including changes in glycolysis, elevated fatty acid (FA) synthesis and alterations in the cellular lipid content and composition<sup>31-34</sup>. Particularly, EhV is the only virus known to date to encode almost a complete pathway for sphingolipid (SL) biosynthesis, resulting in the production of structurally distinct virus-derived glycosphingolipids (vGSLs) by infected cells<sup>35-37</sup>. vGSLs were found to trigger host programmed cell death and are central components of the EhV membranes<sup>37,38</sup>. In addition, *E. huxleyi* cells produce host-derived GSLs (hGSLs), which are found in all *E. huxleyi* strains and serve as a proxy for healthy cells<sup>38,39</sup>, and sialic acid GSLs (sGSLs), which characterize susceptible *E. huxleyi* strains and were suggested to be involved in viral attachment and entry<sup>38</sup>. Given their structural variability and diverse roles, SLs are key players in the arms race between *E. huxleyi* and its virus.

Resistance to infection by EhV has been described in several *E. huxleyi* strains and was previously attributed to ploidy level, genome and transcriptome variations between the strains<sup>16,40</sup>, to expression and activity of specific enzymes, such as DMSP-lyase, and to metacaspase expression<sup>22,41</sup>. Resistant cells were also identified in low numbers (<1%) in infected *E. huxleyi* cultures<sup>42</sup>, revealing that resistance can also be triggered by viral infection. These resistant cells were found to be morphologically distinct from their susceptible progenitors, indicating the involvement of a life-phase transition and highlighting the phenotypic plasticity within *E. huxleyi* populations during infection<sup>16,42</sup>. Nevertheless, the metabolic basis of *E. huxleyi*'s resistance to viral infection is unknown, as is the prevalence of resistant *E. huxleyi* cells in natural populations. In this study, we aimed at addressing this conundrum by identifying specific lipid biomarkers for resistant *E. huxleyi* cells and applying them to natural mixed populations.

## Results

### Untargeted lipidomics profiling of virus-resistant and susceptible *E. huxleyi* strains

To identify lipids that are characteristic of resistant strains, we compared the lipidome of four *E. huxleyi* strains that differ in their susceptibility to viral infection by EhV201 (hereinafter, EhV): the resistant *E. huxleyi* strains CCMP373 and CCMP379 and the susceptible *E. huxleyi* strains CCMP2090 and CCMP374 (hereinafter, *E. huxleyi* strains 373, 379, 2090 and 374, respectively)<sup>22,38,40</sup>. Previous studies reported that following infection of *E. huxleyi* cultures by EhV in the lab, a small proportion of the population (< 1%) can survive and acquire resistance to the virus<sup>16,42</sup>. We were therefore interested to delineate possible correlations between the lipid profile of resistant strains and the evolving resistant cells within infected susceptible cultures.

The lipidome of the resistant and susceptible strains in the presence and absence of the lytic virus EhV201 was compared over a three-day time course using liquid chromatography-high resolution mass spectrometry (LC-HRMS)-based untargeted lipidomics. All untreated cultures grew throughout the experiment, reaching  $1.0\text{-}2.4 \times 10^6$  cells per mL (Fig. 1a). The resistant *E. huxleyi* strains 373 and 379 grew throughout the experiment regardless of the presence of EhV and with no accumulation of virions in the media (Fig. 1b). In contrast, upon addition of EhV, the susceptible *E. huxleyi* strains 2090 and 374 showed growth arrest one day post infection (dpi) and were subsequently lysed (Fig. 1b). Concomitantly, accumulation of virions was detected in the medium of the infected cultures starting from 1 dpi. In all cultures, cells were harvested at four different time points (0, 1, 2 and 3 days) for lipid extraction and untargeted lipidomics analysis.

First, we compared the lipidome of the four strains in the absence of EhV. Unsupervised *k*-means clustering of the extracted data ( $n = 48$ ; 12,190 mass features,  $k = 4$ , Fig. S1a), visualized by principal component analysis (PCA), separated the strains into four distinct clusters (clusters 1-4, Fig. 1c). The first PC axis (31.8%) revealed a clear separation between the susceptible and resistant strains (clusters 1 and 2 vs clusters 3 and 4, respectively), and the second PC axis (16.7%) highlighted further differences between the strains. Next, we applied *k*-means clustering to the combined dataset of cultures with and without addition of EhV ( $n = 96$ ; 12,190 mass features,  $k = 4$ , Fig. S1b), which showed a clear separation between susceptible and resistant strains (clusters 5 and 6 vs clusters 7 and 8, respectively) along the first PC axis (40.1%, Fig. 1d). The second PC axis (15.5%) further separated the susceptible strains at late infection stages (2 and 3 dpi; cluster 5) from early infection stages (0 and 1 dpi) and the uninfected cultures (cluster 6).

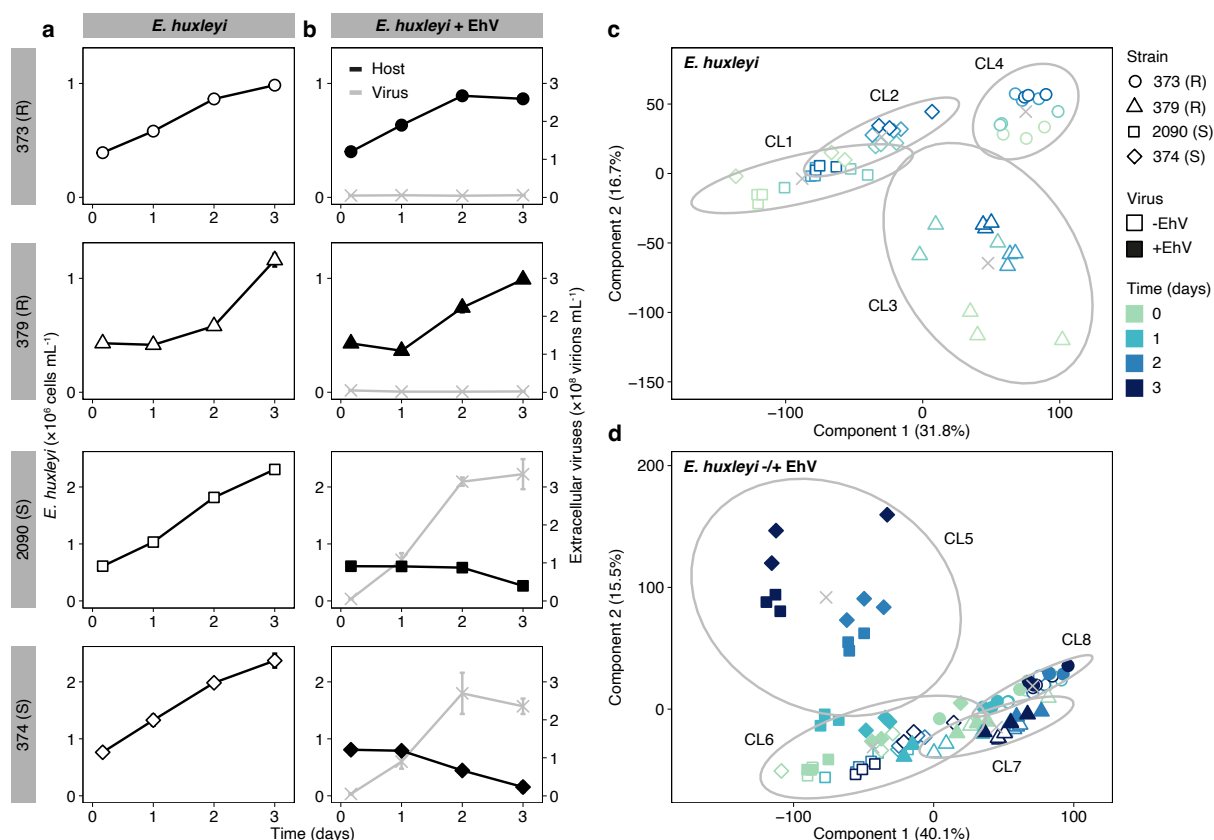

**Figure 1: Untargeted LC-HRMS-based lipidomics analysis reveals differences between virus-resistant and susceptible *E. huxleyi* strains.** (a) Cell abundance during growth of *E. huxleyi* strains that differ in their susceptibility to viral infection: the resistant (R) *E. huxleyi* strains 373 and 379 and the susceptible (S) *E. huxleyi* strains 2090 and 374. (b) Cell abundance (black lines) and production of virions (grey lines) following the addition of EhV. Values for (a) and (b) are presented as the mean  $\pm$  SD ( $n = 3$ ). (c) Clustering of resistant and susceptible *E. huxleyi* strains based on untargeted lipidomics (using 12,190 mass features) and  $k$ -means clustering ( $k = 4$ , Fig. S1a), as visualized by PCA. (d) Clustering of resistant and susceptible *E. huxleyi* strains in the presence and absence of EhV based on untargeted lipidomics (using 12,190 mass features) and  $k$ -means clustering ( $k = 4$ , Fig. S1b), as visualized by PCA. Percentage of explained variance is stated in parentheses. Each cluster (CL) is surrounded by an ellipse, with the mean marked by ‘x’.

Next, we focused on mass features that were differential between the resistant and susceptible clusters in the cultures without EhV (resistant clusters 3 and 4 vs susceptible clusters 1 and 2, Fig. 1c) using a comparative analysis (one-way ANOVA with false discovery rate (FDR)-correction). By doing so, we could reduce the data to 173 differential mass features ( $p < 0.01$ ). Following feature deconvolution and manual curation, these mass features were grouped into 43 putative lipid species (Table S1). We then applied two-dimensional hierarchical clustering to this subset of 43 putative lipid species using the complete dataset (that is, with and without addition of EhV; Fig. 2a and Fig. S2). This subset of lipid species recapitulated the previously observed separation (Fig. 1d) between the resistant and susceptible strains (two main clusters, separating *E. huxleyi* 379 and 373 from *E. huxleyi* 374 and 2090), and between each pair of strains. Similarly, while there was no clear separation between resistant strains in the presence and absence of EhV, the susceptible strains infected with EhV were clustered separately from the uninfected cultures as early as 1 dpi.

The 43 putative lipid species were grouped into two main clusters, each further divided into two sub-clusters (Fig. 2a): (i) lipids with higher intensity in the resistant strains (especially *E. huxleyi* 379), of which most had higher intensity also in infected *E. huxleyi* 2090 cultures; (ii) lipids with higher intensity in both resistant strains; (iii) lipids with higher intensity in the resistant *E. huxleyi* strain 373 and the susceptible *E. huxleyi* strain 374; and (iv) lipids with higher intensity in *E. huxleyi* strain 374 or in both susceptible strains. Out of the 43 putative lipid species, 21 were higher in one or both resistant strains (sub-clusters i and ii). Some of these species were elevated in the resistant *E. huxleyi* strain 379 compared to *E. huxleyi* strain 373, shedding light on possible metabolic differences between these two resistant strains. Seven putative lipid species were higher in the susceptible *E. huxleyi* strains 374 and 2090 (sub-cluster iv), one of which was identified as the known sGSL d18:2/c22:0<sup>38</sup> and three of which were higher in *E. huxleyi* 374 compared to *E. huxleyi* 2090.

We putatively annotated nine lipid species as GSLs using characteristic neutral losses and fragments of long-chain bases (LCBs) and amino fatty acids (FAs, based on MS/MS spectra, **1-5, 9, 12-14**, see Table 1, Fig. S3-S12 and Table S1). These GSL species varied in their LCB composition, including dihydroxylated LCBs d18:0, d18:3, d19:3 and d19:4, and the trihydroxylated LCB t18:0 (Fig. 2b). We manually identified five additional GSL species with the same LCB composition that had higher intensity in the resistant strains (**6-8, 10-11**, see Table 1, Fig. S3, Fig. S13-S17 and Table S2; these GSL species were filtered out in the initial data preprocessing). We classified these GSL species into four groups based on their abundance in the different strains (Table 1, Fig. S18 and Fig. S19): (A) GSL species that are highly abundant in the resistant strains compared to susceptible strains (**1-4**, difference of >1 order of magnitude). These GSL species contain LCB d18:3 and d19:3; (B) GSL species that are found in resistant strains and in infected susceptible strains (**5-10**). These contain LCB d18:0, d18:1, and t18:0. (C) GSL species that are found only in the two resistant strains, with higher abundance in *E. huxleyi* 379 compared to *E. huxleyi* 373 (**11-12**, Fig. S19). These contain LCB d19:4 and were termed resistance-specific GSLs (resGSLs) due to their detection in resistant strains and their absence in susceptible strains. (D) GSL species that are found only in *E. huxleyi* 374 (**13-14**). These contain LCB d19:3 and were termed *E. huxleyi* 374-specific GSLs (374-GSLs).

GSL species containing LCBs d18:1, d18:3 and d19:4 were not detected thus far in the *E. huxleyi*-EhV system. LCBs d18:0, d19:3 and t18:0 were previously reported in the *E. huxleyi*-EhV system: LCB d19:3 in hGSL species and LCB d18:0 and t18:0 in infection-derived GSL and ceramide species (Table S3)<sup>36,43</sup>. Intriguingly, GSL species containing LCB t18:0 (**8-10**), which were detected in resistant strains and in infected cultures (Fig. S18), varied in their FA composition: resistant strains produce GSL species with a clear preference for mono- and di-unsaturated FAs over saturated ones (h22:1 and h22:2 vs h22:0, Fig. S18). Infected cultures, on the other hand, produce GSL species with saturated and mono-unsaturated FAs, as was previously described for t17:0-based vGSL species<sup>36,37</sup>. Importantly, trihydroxylated LCBs were previously found only in vGSL species and were considered a unique attribute of viral infection, derived from the virus-encoded biosynthetic pathway. The tetra-unsaturated LCB d19:4, on the other hand, appears only in resGSLs found resistant strains, and therefore, we suggest that these unique resGSLs can be used as a biomarker for resistant cells in natural populations. Detection of GSL species with tetra-unsaturated LCB and





**Table 1: Putative annotation and identification of GSL species that differ between resistant and susceptible strains and are previously undescribed in the *E. huxleyi*-EhV model system**

| Group                                                 | #  | GSL species<br>LCB/FA    | RT<br>(min) | Measured <i>m/z</i><br>([M+H] <sup>+</sup> ) | Predicted<br>formula                             |
|-------------------------------------------------------|----|--------------------------|-------------|----------------------------------------------|--------------------------------------------------|
| A<br>Higher in resistant                              | 1  | d18:3/h22:1              | 13.12       | 794.6107                                     | C <sub>46</sub> H <sub>83</sub> NO <sub>9</sub>  |
|                                                       | 2  | d18:3/h22:2              | 12.47       | 792.5980                                     | C <sub>46</sub> H <sub>81</sub> NO <sub>9</sub>  |
|                                                       | 3  | d19:3/h21:1              | 13.03       | 794.6107                                     | C <sub>46</sub> H <sub>83</sub> NO <sub>9</sub>  |
|                                                       | 4  | d19:3/h23:2              | 13.18       | 820.6278                                     | C <sub>48</sub> H <sub>85</sub> NO <sub>9</sub>  |
| B<br>Only in resistant<br>and during infection        | 5  | d18:0/h22:0*             | 14.44       | 802.6722                                     | C <sub>46</sub> H <sub>91</sub> NO <sub>9</sub>  |
|                                                       | 6  | d18:0/h22:1 <sup>†</sup> | 14.22       | 800.6600                                     | C <sub>46</sub> H <sub>89</sub> NO <sub>9</sub>  |
|                                                       | 7  | d18:1/h22:1*             | 14.01       | 798.6440                                     | C <sub>46</sub> H <sub>87</sub> NO <sub>9</sub>  |
|                                                       | 8  | t18:0/h22:0*             | 14.00       | 818.6702                                     | C <sub>46</sub> H <sub>91</sub> NO <sub>10</sub> |
|                                                       | 9  | t18:0/h22:1              | 13.77       | 816.6531                                     | C <sub>46</sub> H <sub>89</sub> NO <sub>10</sub> |
|                                                       | 10 | t18:0/h22:2 <sup>‡</sup> | 13.18       | 814.6346                                     | C <sub>46</sub> H <sub>87</sub> NO <sub>10</sub> |
| C<br>Only in resistant                                | 11 | d19:4/h22:1 (resGSL)     | 12.92       | 806.6127                                     | C <sub>47</sub> H <sub>83</sub> NO <sub>9</sub>  |
|                                                       | 12 | d19:4/h22:2 (resGSL)     | 12.25       | 804.5975                                     | C <sub>47</sub> H <sub>81</sub> NO <sub>9</sub>  |
| D<br>Only in the susceptible<br><i>E. huxleyi</i> 374 | 13 | d19:3/h22:2 (374-GSL)**  | 12.98       | 806.6143                                     | C <sub>47</sub> H <sub>83</sub> NO <sub>9</sub>  |
|                                                       | 14 | d19:3/h22:3 (374-GSL)**  | 12.34       | 804.5981                                     | C <sub>47</sub> H <sub>81</sub> NO <sub>9</sub>  |

Differences in the abundance profiles were tested by a one-way ANOVA, accounting for the strain and addition of EhV, followed by Tukey's post-hoc test,  $p < 0.01$  (Table S10 and Table S11). \*Ceramide d18:0/h22:0 and t18:0/h22:0 were previously found to increase during infection<sup>36</sup>. Ceramide d18:1/h22:1 was previously found to increase during infection and in resistant haploid cells<sup>45</sup>. <sup>†</sup>GSL d18:0/h22:1 (**6**) presence in infected cells could not be verified using MS/MS due to low intensity. <sup>‡</sup>GSL t18:0/h22:2 (**10**) was detected in infected cells based on MS/MS analysis. \*\*374-GSL d19:3/h22:2 (**13**) has the same fragmentation pattern as hGSL d19:3/h22:2, yet appears at a slightly later retention time (Fig. S34), suggesting that they are isomers. 374-GSL d19:3/h22:3 (**14**) was previously described as a hGSL species<sup>38</sup>, however it was not detected in *E. huxleyi* 373, 379 and 2090 in this study. GSL species were identified as 'Level 2 – putatively annotated compounds' according to the Metabolomics Standards Initiative<sup>46</sup>. LCB, long-chain base; FA, fatty acid; RT, Retention time.

### Potential enzymes involved in modulating GSL composition in resistant strains

The detection of resGSL species with LCB d19:4 (**11-12**), which contains an additional double bond compared to the LCB d19:3 found in hGSL species (Table S3), indicates the involvement of an additional sphingolipid desaturase (SLD) in resistant strains, which would be responsible for the fourth double bond. A gene encoding a putative SLD was previously identified in *E. huxleyi* (*sld2*)<sup>31,47</sup>, and we identified four additional genes based on the *E. huxleyi* genome and expressed sequences (*sld1*, *sld3-sld5*, Table S4). Phylogenetic analysis of the conserved domain of the SLD proteins revealed three distinct clades (I-III, Fig. 3a and Table S5), each consisting of diverse taxonomic groups. Out of the five putative *E. huxleyi* SLDs, SLD1 clustered together with a viral SLD (EhV201 SLD, AET97947.1, clade I). We further examined the expression of these genes using previous transcriptomics experiments with *E. huxleyi* strains 373, 379, 2090 and 374<sup>40,48</sup>. *sld1* was expressed in the resistant *E. huxleyi* strains 373 and 379 and not in the susceptible strains (Fig. 3c and Fig. S20a), suggesting that the viral and resistant-host enzymes share a similar role in the GSL biosynthetic pathway. Notably, *sld4* was also differentially expressed in the resistant strains, however, the protein falls into a different clade than the viral SLD (clade III). Therefore, *sld4* is a possible candidate for the formation



of the fourth double bond in resGSLs (**11-12**), which were detected only in resistant strains. The other genes (*sld2*, *sld3* and *sld5*) were expressed in all strains (Fig. S20a and Fig. S21a). We were further intrigued to identify possible similarities between the viral and the host biosynthetic pathways that are responsible for the production of GSL species with trihydroxylated LCBs in infected and resistant cells. Previous studies suggested that the characteristic trihydroxylation of the LCB in infection-derived vGSL species is facilitated by a viral sphingoid base hydroxylase (EhV201 SBH, AET97919.1)<sup>36,49</sup>, which is highly expressed at early stages of infection (Fig. S22). LCB t17:0 is the major LCB in vGSL species, while LCB t16:0 and t18:0 are found in lower abundances<sup>36</sup>. In GSL species of resistant strains (**8-10**), on the other hand, only LCB t18:0 was detected. A gene encoding a putative SBH was previously identified in *E. huxleyi* (*sbh1*)<sup>31,40</sup>, and we identified six additional genes based on the *E. huxleyi* genome and expressed sequences (*sbh2-sbh7*, Table S4). Phylogenetic analysis of the conserved domain of the SBH proteins revealed that the *E. huxleyi* SBHs do not form a clade together but rather show similarities to diverse phyla, indicating different evolutionary origins (Fig. 3b and Table S6). Interestingly, SBH4 and SBH5 clustered together with the viral SBH, indicating a possible host-virus co-evolution. Out of the seven SBHs, *sbh4* and *sbh5* were highly expressed in the resistant *E. huxleyi* strains 373 and 379 and not in the susceptible *E. huxleyi* strains 2090 and 374 (Fig. 3d and Fig. S20b). Concomitantly, *sbh2* was differentially expressed in the susceptible strains, while *sbh1* and *sbh6* were expressed in all four strains. *sbh7* was detected in all four strains, with higher expression in infected *E. huxleyi* 2090 cultures. The expression of *sbh3* was not detected in all strains and conditions tested (Fig. S20b and Fig. S21b). Future functional analysis of these SLDs and SBHs will allow to determine their role in the biosynthetic pathway of GSL species in different *E. huxleyi* strains and during viral infection.

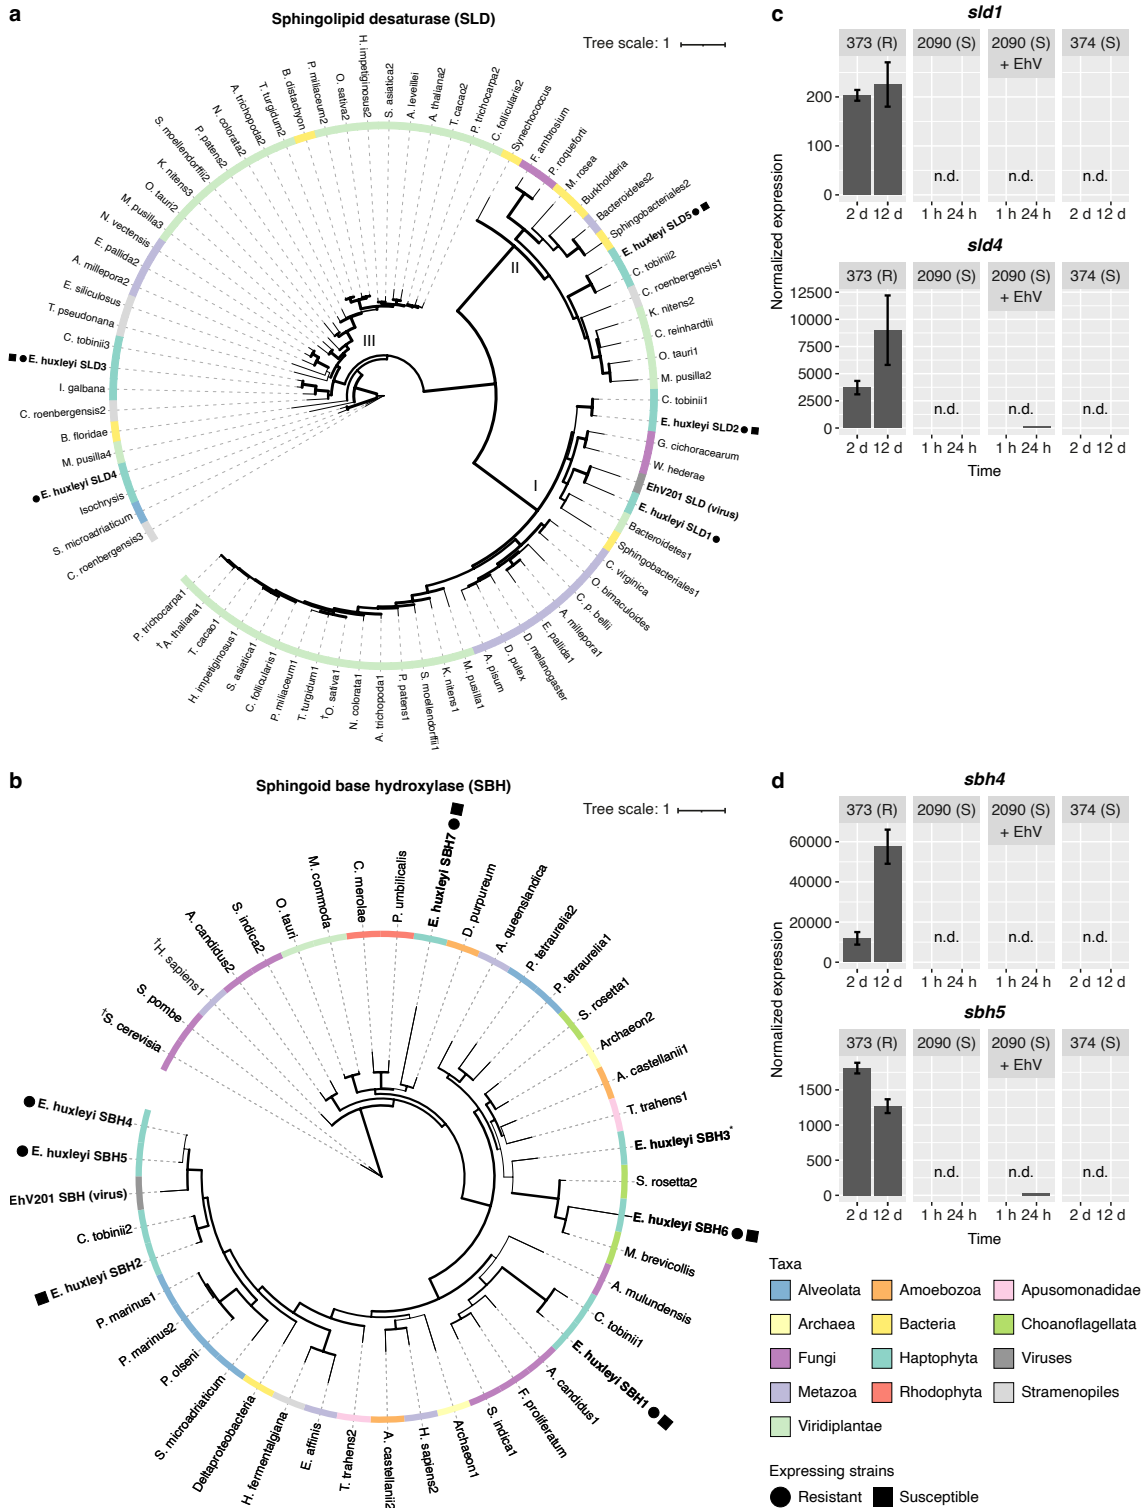

**Figure 3: Phylogenetic analysis and gene expression patterns of SLDs and SBHs in resistant and susceptible *E. huxleyi* strains.** Phylogenetic trees of (a) SLD and (b) SBH proteins based on the conserved domains. Protein domain sequences were aligned using Mafft (for SLD) and ClustalW (for SBH). Maximum Likelihood trees (PhyML) are shown. Colors represent different taxonomic groups and shapes indicate the expression in the resistant *E. huxleyi* strains 373 and 379 (circles) and in the susceptible *E. huxleyi* strains 2090 and 374 (rectangles; legend at the bottom right side). †Functionally characterized protein. \*Expression of *sbh3* was not detected in the *E. huxleyi* strains and conditions tested. Bootstrap values are represented by the line width. Expression patterns of (c) *sld1* and *sld4*, and (d) *sbh4* and *sbh5* in the resistant *E. huxleyi* strain 373 and in the susceptible *E. huxleyi* strains 2090 (uninfected and infected cultures) and 374. Values for *E. huxleyi* strain 373 are presented as the mean  $\pm$  SD ( $n = 2$ ). Expression was not detected in *E. huxleyi* strains 2090 and 374 under the tested conditions.

## Detection of resistant algal cells in an open ocean bloom using lipid biomarkers

Since little is known about resistance to viral infection in algal blooms, we sought to utilize our new resistant metabolic biomarker (resGSL) to assess the occurrence of resistant cells in an oceanic *E. huxleyi* bloom. To that end, biomass samples for lipidomics analysis were collected during the ‘Tara Breizh Bloom’ cruise in the Celtic Sea, capturing the demise phase of an *E. huxleyi* bloom (Fig. 4a)<sup>50</sup>. The occurrence of hGSL species (Fig. 4b), which are known lipid biomarkers for *E. huxleyi* and are present in all strains<sup>37,39</sup>, confirmed the presence of *E. huxleyi* cells, as was also visible using scanning electron microscopy<sup>50</sup>. sGSL species, which characterize susceptible strains<sup>38</sup>, were also detected (Fig. 4c), indicating the presence of virus-susceptible *E. huxleyi* cells in the water. We could also detect 374-GSL species (group D, **13-14**) at a similar intensity as the hGSL species (Fig. 4d), indicating that some *E. huxleyi* cells share similarity to the susceptible *E. huxleyi* strain 374. Importantly, we detected resGSL d19:4/h22:2 (**12**) in four out of the five days of sampling (Fig. 4e). This is the first demonstration of the presence of resistant *E. huxleyi* cells during bloom succession of *E. huxleyi*. The occurrence of hGSL, sGSL, 374-GSL and resGSL species during the demise phase of the bloom suggests a complex population composition towards the end of the bloom.

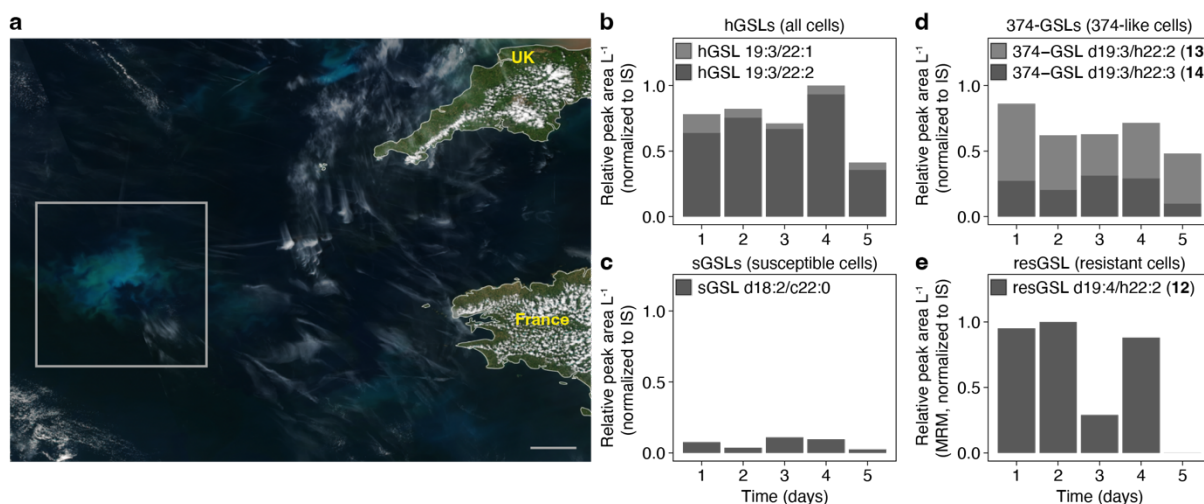

**Figure 4: Detection of resGSL in an open ocean *E. huxleyi* bloom.** (a) Satellite ocean true-color image from the Visible Infrared Imaging Radiometer Suite (VIIRS) onboard the Suomi National Polar-orbiting Partnership (SNPP) depicting the bloom area on May 21, 2019 (marked by a rectangle, source: <https://www.star.nesdis.noaa.gov/sod/mecb/color/ocview/ocview.html>). Scale bar, 50 km. Relative intensity of (b) hGSL (all *E. huxleyi* cells), (c) sGSL (susceptible *E. huxleyi* cells) and (d) 374-GSL (susceptible, 374-like *E. huxleyi* cells, **13-14**) species during five days of sampling. (e) Relative intensity of resGSL d19:4/h22:2 (resistant *E. huxleyi* cells, **12**) analyzed using high-sensitivity multiple reaction monitoring (MRM) mode during five days of sampling.

## Lipidomics profiling during *E. huxleyi* bloom succession and virus-induced demise

Sampling open ocean bloom provides only a snapshot of the bloom dynamics. Therefore, we sought to gain a detailed temporal resolution for our suite of biomarkers in order to assess the various phenotypes that occur during *E. huxleyi* bloom succession. Therefore, we conducted an *in situ* mesocosm experiment in the coastal waters of southern Norway<sup>51,52</sup>, where annual blooms and viral infection of *E. huxleyi* occur naturally<sup>27</sup>. Briefly, the experiment included seven mesocosm bags that were filled with natural marine microbial communities and

monitored daily over 24 days. Four bags (bags 1-4) were sampled for lipidomics analysis and are discussed hereinafter. All bags were supplemented with nutrients at a nitrogen to phosphorous ratio of 16:1 to favor the growth and induce a bloom of *E. huxleyi*<sup>53</sup>. *E. huxleyi* blooms were observed starting from day 10 in all bags, reaching a concentration of up to  $8 \times 10^7$  cells per L at day 17, followed by bloom demise starting from day 18 (Fig. 5a). Viral infection varied between the bags, as was visible by measurement of biomass-associated EhV by quantitative PCR (qPCR) using the major capsid protein (*mcp*) gene. Bag 4 showed the strongest increase in EhV starting from day 17, followed by bag 2 and bag 1. No viral proliferation was observed in bag 3 (Fig. 5b). Concomitantly, the extent of bloom demise also varied between the bags, reaching the lowest cell abundance in bag 4 (Fig. 5a).

We followed changes in the lipid composition of the particulate fraction (1.6-25  $\mu\text{m}$ ) during the bloom and demise of *E. huxleyi* (days 10-23) by LC-HRMS. Known lipid biomarkers of *E. huxleyi* were used to describe changes that occur during the bloom: hGSL species, present in all *E. huxleyi* strains<sup>37,39</sup>, correlated with *E. huxleyi* abundance (Fig. 5c, Pearson correlation,  $r = 0.66-0.73$ , Table S7); sGSL species, which characterize susceptible strains<sup>38</sup>, also correlated with *E. huxleyi* abundance, primarily in the bloom phase (Fig. 5d,  $r = 0.58-0.72$ , Table S7).

To detect active viral infection of *E. huxleyi* cells, we monitored the production of vGSL species that are produced only by infected cells<sup>36,37</sup>. Six t17:0-based vGSL species and one t16:0-based vGSL species were positively correlated with the varying degree of infection between the bags, as measured by the abundance of biomass-associated EhV (Fig. 5e,  $r = 0.87-0.95$ , Table S7). In bag 4, the sum concentration of vGSL species was similar to that of hGSL species ( $\sim 15 \mu\text{g per L}$  and  $\sim 20 \mu\text{g per L}$  on day 18, respectively), which exemplifies the pronounced metabolic remodeling in infected cells. Moreover, several vGSL species were detected in bag 4 as early as day 16, one day before the first detection of biomass-associated EhV (Fig. 5b) or extracellular EhV<sup>52</sup>. To our surprise, we detected low levels of vGSL species also in bag 3 starting from day 20, although viral abundance (as measured by qPCR, Fig. 5b) was below the detection limit. This indicates that a small number of *E. huxleyi* cells in bag 3 were infected following bloom demise, however, it is not clear whether production of virions or abortive infection occurred. Altogether, these observations suggest that vGSL species can serve as a more sensitive biomarker for the occurrence of infected cells in the natural environment than the quantification of virions by gene biomarkers.

Interestingly, we could not detect resGSL species (**11-12**, group C), which are characteristic of resistant cells, suggesting that the abundance of resistant *E. huxleyi* cells throughout the bloom and demise phases (and within our sampling period) was below the level of detection. GSL species of group A (**1-4**), which are found in higher intensity in resistant strains compared to susceptible strains in the laboratory (Fig. 2a and Fig. S18), appeared from the beginning of the bloom and were highly correlated to hGSL species and to a lesser extent to *E. huxleyi* abundance and sGSL species (Fig. 5f,  $r = 0.76-0.96$ ,  $0.53-0.75$  and  $0.70-0.81$ , respectively, Table S7). Accordingly, the detection of these GSL species is most probably derived from susceptible cells that dominated the bloom rather than rare resistant cells. 374-GSL species (group D, **13-14**) appeared in a similar pattern to group A (Fig. S23 and Table S7), indicating a high abundance of susceptible cells that share some similarity to *E. huxleyi* strain 374. GSL species of group B (**5-6**, **8-10**), which are found in resistant strains and infected susceptible strains, appeared mostly from day 17 onwards and were highly correlated to the abundance of

EhV and of the main vGSL species (vGSL t17:0/h22:0, Fig. 5g,  $r = 0.69-0.99$ , Table S7), as was also observed in the laboratory (Fig. S18). The amount of these GSL species was  $\sim 20$  times lower than that of vGSL species, and might be a result of enzyme promiscuity in infected cells<sup>36</sup>. Nevertheless, the infection-related occurrence of these GSL species, which are characteristic of resistant strains and are also induced during infection in the laboratory (Fig. S18), might suggest an infection-derived initiation of cellular processes that eventually lead to resistance.

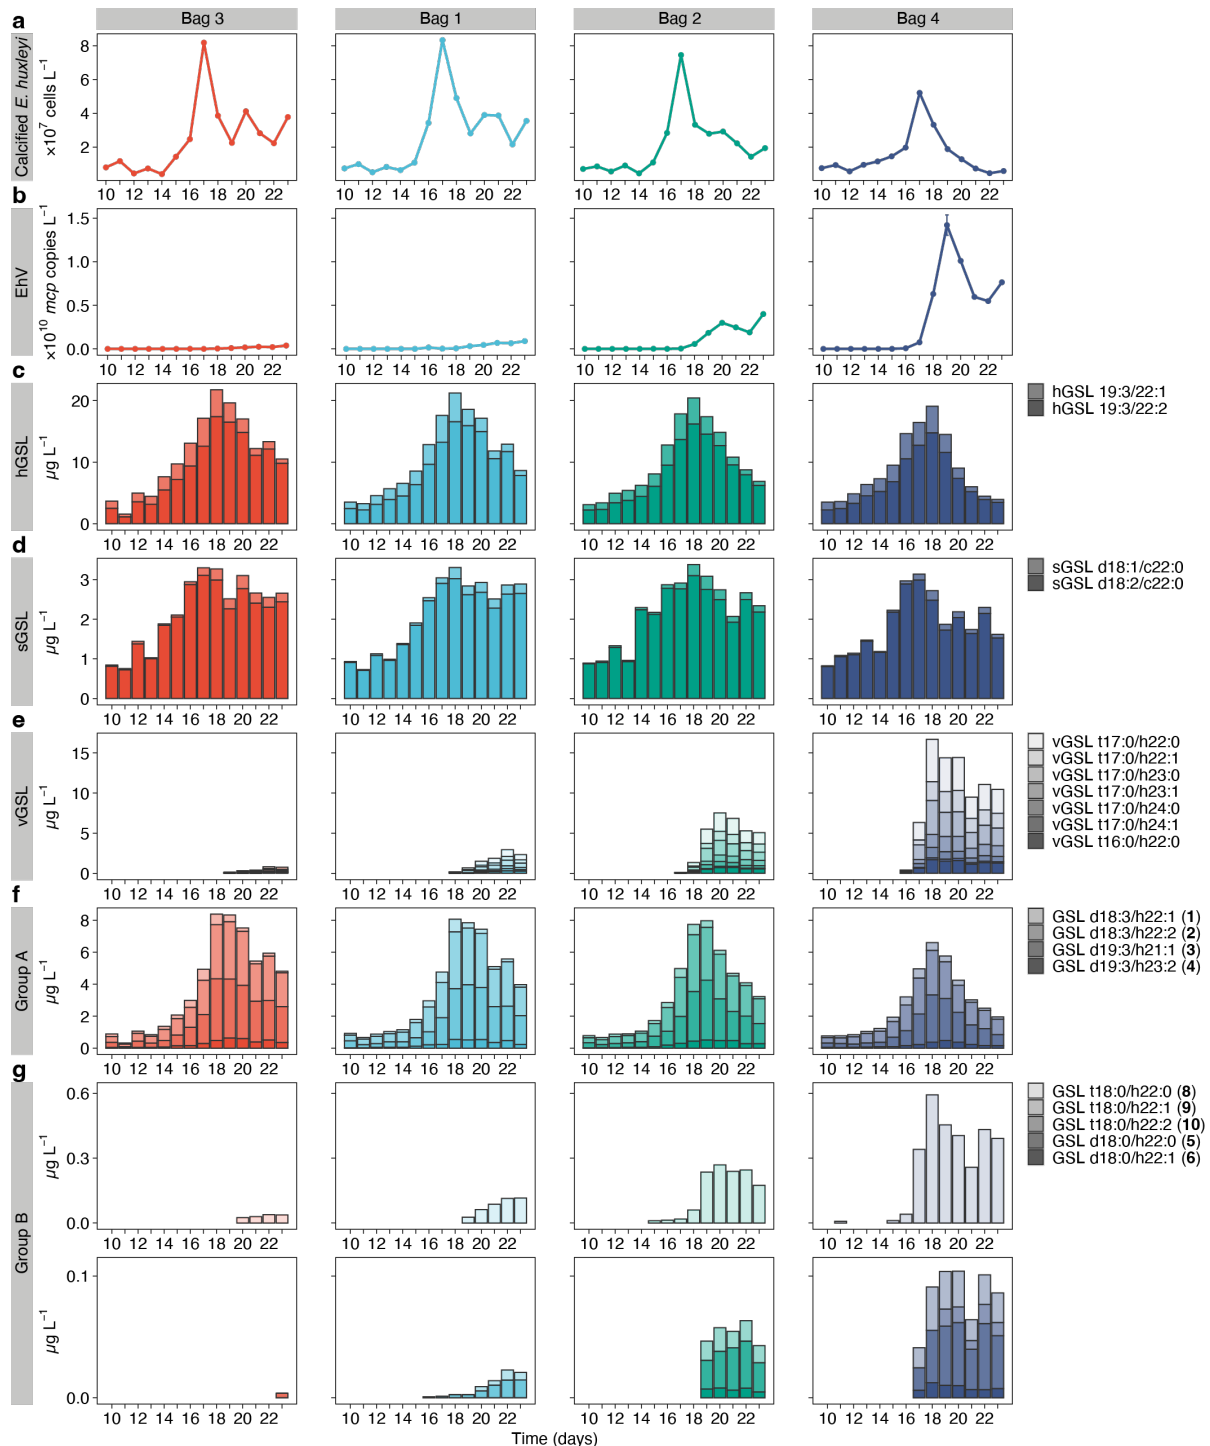

**Figure 5: Changes in cellular content of GSL species in response to viral infection of natural *E. huxleyi* populations.** Variable growth and infection dynamics of *E. huxleyi* across four mesocosm bags based on (a) the



abundance of calcified *E. huxleyi* cells and (b) biomass-associated EhV, starting from day 10 of the experiment. Bags are ordered by increasing EhV abundance, with the lowest in bag 3 and the highest in bag 4. Abundance of calcified *E. huxleyi* cells is based on flow cytometry analysis and abundance of biomass-associated EhV is based on the quantification of the EhV major capsid protein (*mcp*) gene by qPCR. *mcp* copy values are presented as the mean  $\pm$  SD ( $n = 3$ , technical replicates). Concentration of (c) hGSL, (d) sGSL, (e) vGSL, (f) group A GSL, and (g) group B GSL species are presented. GSL d18:1/h22:21 (7) was not detected to due technical reasons. Group B was divided into two rows due to difference in concentrations of the different species.

### Remodeling of GSL composition and induction of resistance in infected cultures

To assess whether resistant *E. huxleyi* cells appear in low numbers during bloom succession, as detected in the open ocean bloom (Fig. 4e), we isolated numerous *E. huxleyi* clones during the mesocosm experiment and determined their susceptibility to infection by EhV strain M1 (EhVM1), which was isolated during the same mesocosm experiment<sup>54</sup>. Most isolates were found to be susceptible to EhVM1, among them isolates RCC6918, RCC6936 and RCC6912 (Fig. 6a, b and Fig. S24a, b), which were isolated during the bloom phase of *E. huxleyi*<sup>51</sup>. However, we also isolated a few resistant *E. huxleyi* strains, among them isolate RCC6961 (Fig. S24c). This isolate, along with additional resistant isolates, was isolated during the virus-induced demise phase of the *E. huxleyi* bloom<sup>51</sup>. Interestingly, some of the isolated susceptible strains showed rapid recovery 1-2 weeks after viral infection (RCC6918 and RCC6912, Fig. 6b and Fig. S24b, respectively). The recovered populations were resistant to the virus, as was validated by re-exposing the cultures to viral infection (Fig. S25a). To examine whether the newly identified GSL markers for resistant cells can differentiate between the *E. huxleyi* isolates with different phenotypes, we compared the GSL composition of the isolates and the recovered cultures (Fig. 6c, d and Fig. S25b). All isolates had similar amounts of hGSL species. The susceptible mesocosm isolates RCC6936, RCC6918 and RCC6912 had a similar GSL composition to *E. huxleyi* 374, having high intensity of sGSL and 374-GSL species, and a lower intensity of group A GSL species (Fig. 6c, d and Fig. S25b). GSL species from groups B and C were not detected in these susceptible isolates. The resistant isolate RCC6961 had a similar GSL composition to the resistant laboratory strains 373 and 379, with higher intensity of GSL species from group A (compared to the susceptible isolates) and presence of GSL species from groups B and resGSL species from C (Fig. 6c). The distinct occurrence of resGSLs species in a resistant isolate further supports its use as a biomarker for resistant cells. As predicted based on the GSL biomarkers, sGSL species were not detected in this isolate, and, surprisingly, neither were 374-GSL species. Remarkably, the cultures that recovered following infection of isolates RCC6918 and RCC6912 and acquired resistance to the viral infection had a similar GSL composition to the resistant isolate RCC6961 and the resistant laboratory strains 373 and 379, including the presence of resGSLs (Fig. 6d and Fig. S25b). These results indicate a metabolic plasticity in GSL metabolism, which corresponds to the change in phenotype from susceptibility to resistance towards viral infection. Furthermore, the detection of resGSL species (group C) in resistant isolates from the mesocosm and recovered resistant cultures suggests that these GSL species might have been produced during the mesocosm experiment by these rare populations, albeit in concentrations below our detection limit.



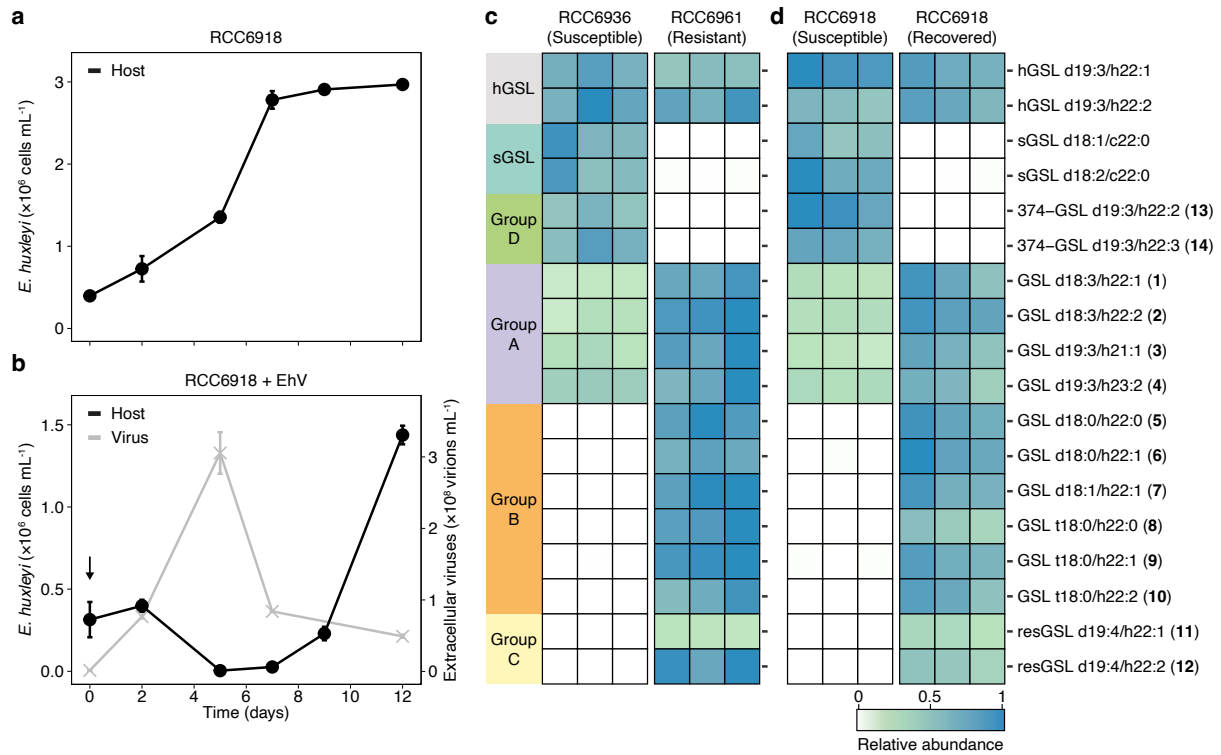

**Figure 6: Plasticity in the GSL composition of *E. huxleyi* cultures that recover following viral infection.** (a) Cell abundance in cultures of the susceptible *E. huxleyi* isolate RCC6918, isolated from the mesocosm experiment. (b) Cell abundance (black) and production of virions (grey) following addition of EhVM1 to *E. huxleyi* isolate RCC6918. A recovered resistant population emerged a week after infection. Values of (a) and (b) are presented as the mean  $\pm$  SD ( $n = 2$ ). The black arrow indicates the addition of EhVM1 to the cultures. (c) GSL composition of the susceptible *E. huxleyi* isolate RCC6936 and the resistant *E. huxleyi* isolate RCC6961, both isolated from the mesocosm experiment ( $n = 3$ ). (d) GSL composition of the susceptible *E. huxleyi* isolate RCC6918, isolated from the mesocosm experiment, and of the culture that recovered following infection and was resistant to the virus ( $n = 3$ ). Values for each lipid species (row) in (c) and (d) are shown after normalization. GSL species are grouped and numbered based on Table 1.

## Discussion

Resistance to viral infection has been described in various phytoplankton cultures under laboratory conditions<sup>15,16,55,56</sup>. Nevertheless, the extent of resistance in natural algal populations is unknown as we lack the tools to detect resistant cells, hindering our ability to understand the metabolic basis of resistance to viral infection and its ecological significance.

In the *E. huxleyi*-EhV model system, the difference in susceptibility of *E. huxleyi* strains to viral infection has been previously associated to ploidy level during life cycle changes, as well as to genome and transcriptome variations between the strains<sup>16,22,40,42,57</sup>. Resistant cells were also identified as a small sub-population in infected cultures<sup>42</sup>. Yet, to date there exists no specific metabolic biomarker for algal resistance to viral infection, and the mechanisms underlying resistance are largely unknown.

### Proposed functional role of resistance-specific LCBs.

resGSL species found in resistant cells are characterized by an uncommon tetra-unsaturated LCB 19:4, which has been previously identified only in a few dinoflagellates and other haptophytes (e.g. GSL d19:4/h22:1, which was detected in *Isochrysis galbana*)<sup>58</sup>. This LCB has an additional double bond compared to the LCB d19:3, which is found in GSL species in *E. huxleyi* (hGSL, group A and 374-GSL species, Table S3), other haptophytes and dinoflagellates, and in SLs of fungi and marine invertebrates<sup>39,58-61</sup>. Interestingly, resistant *E. huxleyi* strains are also characterized by GSL species containing the trihydroxylated LCB t18:0 (Fig 2b and Table 1), which is highly abundant in plants and fungi<sup>62</sup> and was thus far found only in vGSL species produced by infected cells (in addition to t16:0- and t17:0-based vGSL species, Table S3)<sup>36,38</sup>.

Both LCB unsaturation and hydroxylation were found to affect the biophysical properties of membranes: LCB unsaturation hinders the ability of SLs to form ordered domains within lipid bilayers, known as ‘lipid rafts’<sup>63</sup>, while additional hydroxyl groups facilitate the formation of more hydrogen bonds, leading to an increased stability and decreased permeability of the membrane and to lateral diffusion of membrane proteins<sup>62</sup>. Such changes in SL composition can also initiate signal transduction within the cells, as was found in plants, yeast, and mammals<sup>62,64</sup>. Subsequently, they allow organisms to cope with environmental stress, such as low temperature<sup>65,66</sup>, and can alter the susceptibility of cells to viral infection<sup>67-70</sup>. Specifically, GSL-rich lipid rafts in host cells were shown to serve as cellular entry or egress points in diverse systems<sup>71</sup>, suggesting that membrane lipids are under strong selection pressure during host-virus co-evolution, possibly driving the plasticity in lipid composition.

In the *E. huxleyi*-EhV model system, the lipid envelope of EhV and the *E. huxleyi* plasma membrane seem to play an important role at the onset of the infection process, mediating the entry of the virus to *E. huxleyi* cells by endocytosis or membrane fusion mechanism<sup>72</sup>. It was previously suggested that sGSLs, which characterize susceptible cells, mediate viral adsorption to host cells<sup>38</sup>. The occurrence of resGSLs and t18:0-based GSLs in resistant cells, in addition to the absence of sGSLs, might therefore hinder viral adsorption to the cells by impeding membrane fusion. Nevertheless, further structural and biochemical analyses are needed to determine the role of resGSLs and t18:0-based GSLs in modulating the resistance of *E. huxleyi* cells to viral infection.

## Plasticity in GSL composition during *E. huxleyi*-EhV interactions

The lipidome of *E. huxleyi* has been identified as a sensitive metabolic indicator for environmental stress conditions, such as nutrient limitation and viral infection, reflecting the physiological state of the cells<sup>32,45,73,74</sup>. In particular, GSLs were found to play a distinct role in the *E. huxleyi*-EhV system due to their involvement in cell signaling during infection as well as in viral assembly and egress<sup>36-39</sup>. The identification of resGSLs and other GSL species characteristic of resistant *E. huxleyi* cells (Fig 2b and Table 1) broadens our view of the GSL diversity in the *E. huxleyi*-EhV model system and adds valuable biomarkers that were thus far missing (Fig. 7a and Table S3). While hGSL and group A GSL species are shared among all *E. huxleyi* cell types (that is, the different strains and phenotypes), most GSL species are produced only by some: sGSL and 374-GSL species by susceptible cells; vGSL species by infected cells; group B GSL species by both infected and resistant cells; and resGSL species by resistant cells (Table S3). A recent study further found that resistant *E. huxleyi* strains have a more diverse GSL composition than susceptible ones under nutrient-replete conditions<sup>75</sup>. GSL species vary in their sugar headgroup, FA and LCB<sup>76</sup>. In *E. huxleyi*, except for sGSL species that contain a sialic acid headgroup<sup>38</sup>, all other known GSL species contain a hexose-based sugar headgroup (Table S3). Additionally, most species have a highly similar FA composition (with the hydroxylated h22:0, h22:1 and h22:2 FAs being the most common), except for vGSL species that also contain longer FAs of 23-24 carbons, group A GSL species that contain FAs with 21 and 23 carbons (Table 1), and sGSL species that contain non-hydroxylated FAs (c22:0, c22:1, see Table S3)<sup>38</sup>. LCB composition, on the other hand, seems to be the main factor that differentiates between the various GSL groups and, consequently, between the cell types, thus driving the phenotypic plasticity in the *E. huxleyi*-EhV model system (Fig. 7a and b). Some LCBs are shared among several GSL species and cell types (LCB d18:1, d18:3 and d19:3), while others appear only in specific GSL species and cell types (LCB d18:2 in sGSLs of susceptible cells, LCB d19:4 in resGSLs of resistant cells, LCB d18:0 and t18:0 in group B GSLs of resistant and infected cells, and LCB t16:0 and t17:0 in vGSLs of infected cells), leading to a unique LCB profile for each cell type (Fig. 7b). Biosynthetic genes at various steps of the GSL pathway determine LCB composition, from the formation of the LCB to its hydroxylation and unsaturation<sup>77</sup>. The presence of these genes and their differential expression under various biotic and abiotic conditions determine the GSL composition of the cells<sup>66</sup>. In infected *E. huxleyi* cells, virus-encoded SL biosynthetic enzymes lead to the production of t17:0-based vGSLs<sup>36</sup>. In resistant *E. huxleyi* strains, our results suggest that the differential expression of specific *sld* and *sbh* genes (Fig 6c, Fig. 3c and d) accounts for the biosynthesis of d19:4-based resGSL and t18:0-based GSL species. Remarkably, resistant *E. huxleyi* cells that emerge from infected susceptible cultures as early as one week post infection (Fig. 6b) produce resGSL and group B GSL species that are characteristic of resistant strains, consisting of LCBs that are not found in the parent susceptible strains (Fig. 6c). This striking difference between the parent cells and the derived resistant cultures delineates the plasticity of the *E. huxleyi* lipidome. Such a rapid modulation of GSL composition following viral infection is therefore not restricted only to infected cells but might occur also in cells that evade infection or survive and become resistant to the virus. If so, viral infection might directly induce changes in host LCB biosynthesis and lead to the formation of GSL species that facilitate resistance. Alternatively, resistant cells may already exist as a rare sub-population in

cultures of susceptible strains. Such cultures can recover from infection following the death of susceptible cells due to viral infection, which allows the resistant cells to proliferate. The phylogenetic similarity between the enzymes expressed by resistant strains (SLD1, SBH4 and SBH5) and their viral analogues (EhV201 SLD and EhV201 SBH, Fig. 7c, Fig. 3a and b) may further indicate competing biosynthetic pathways that are co-expressed during infection and affect its outcome, shedding light on the ongoing co-evolution between *E. huxleyi* and its virus.

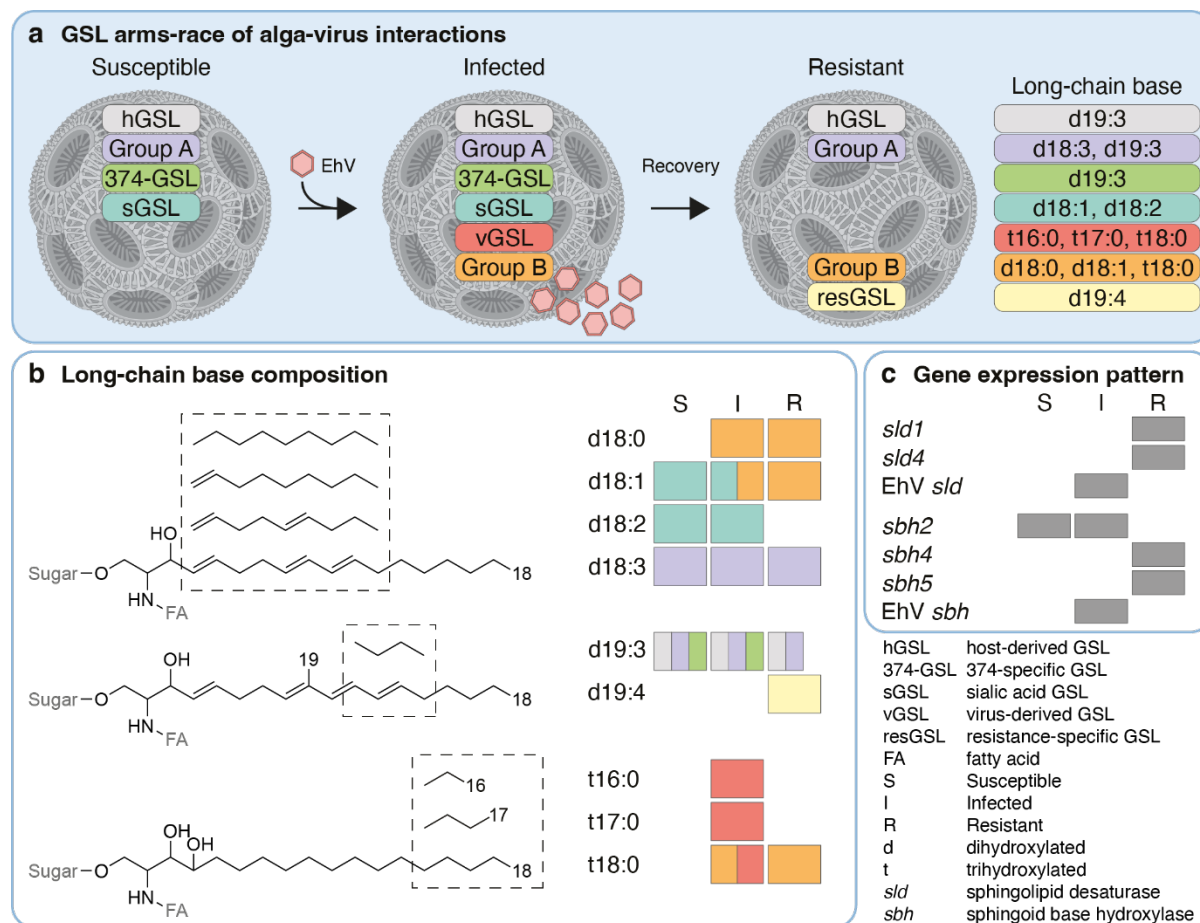

**Figure 7: The GSL-based arms race between *E. huxleyi* and EhV.** (a) The GSL composition of susceptible, infected, and resistant *E. huxleyi* cells. Each GSL group is marked with a different color and consists of different LCBs. Infection by EhV leads to the production of vGSL and group B GSL species, while recovered cells and resistant strains present a unique GSL composition, consisting of group B and resGSL species. Scheme created with BioRender.com. (b) LCB composition of GSLs in the *E. huxleyi*-EhV system. Presented are the structure of the different LCBs (left) and the LCB profile of susceptible (S), infected (I) and resistant (R) cells (right). Infected cells produce trihydroxylated LCBs (found in vGSL and group B GSL species), while resistant cells produce both trihydroxylated and tetra-unsaturated LCBs (found in group B and resGSL species, respectively). Colors mark the GSL group in which the LCB is found, as in (a). The position of the double bonds and functional groups were assigned based on the most common structure in the Lipid Maps Structure Database (LMSD)<sup>44</sup>. (c) Expression pattern of *sld* and *sbh* genes which are differentially expressed in susceptible (S), infected (I) and resistant (R) *E. huxleyi* strains. *sld* and *sbh* genes are involved in LCB modification as part of the GSL biosynthetic pathway. EhV *sld* and EhV *sbh* are encoded by the EhV genome.

### Detecting resistant *E. huxleyi* cells in natural populations

Resistance to viral infection has been long studied using model systems in laboratory settings, describing a wide array of *E. huxleyi* strains that vary in their susceptibility to viral infection,

and of EhV strains that vary in their level of infectivity<sup>22,42,78</sup>. *E. huxleyi* strains can recover from infection and gain resistance to the virus, highlighting their phenotypic plasticity and the rapid change in the dominating phenotypic state in the host cell population<sup>42,79</sup>. Nevertheless, although we are able to detect susceptible and infected *E. huxleyi* cells in natural samples using GSL biomarkers (Fig. 5d,e)<sup>38,39</sup>, we still lack the tools to detect resistant cells in nature and to monitor their dynamics in natural heterogeneous populations.

In this study, we were able to detect resGSL species during the demise of an open ocean *E. huxleyi* bloom (Fig. 4e), indicating, for the first time, the occurrence of virus-resistant *E. huxleyi* cells in natural populations. The absence of resGSLs in samples from the mesocosm experiment stresses the scarcity of resistant *E. huxleyi* cells during the bloom phase and the early phase of the virus-induced bloom demise. This is further supported by the detection of resGSLs in resistant *E. huxleyi* isolates that originate from the mesocosm experiment. Additionally, the emergence of resistant cells 1-2 weeks after viral infection of some susceptible isolates in the laboratory (Fig. 6b) suggests that these cells can be detected during late and post-bloom phases in nature, as observed in the open ocean samples (Fig. 4e). Thus, the sampling time of the mesocosm experiment might not have been long enough to see such an emergence of resistant sub-populations.

In the future, combining the GSL biomarkers for the different cell types with advanced methods, such as single-cell lipid profiling and single-cell RNA sequencing<sup>13,80,81</sup>, could allow us to deconstruct the metabolic and phenotypic outcome of viral infection. Studying and identifying the various cell types that constitute algal blooms and the metabolites they use to communicate will provide valuable insights into the host-virus arms race during bloom succession.



## Materials and Methods

### Strains of *E. huxleyi* and EhV used in this study

Four *E. huxleyi* strains were used for the untargeted lipidomics profiling: CCMP2090, CCMP373, CCMP374 and CCMP379 (hereinafter, *E. huxleyi* 2090, 373, 374 and 379), all are non-calcifying. *E. huxleyi* 2090 and 374 are susceptible to viral infection, e.g., by EhV201, while *E. huxleyi* 373 and 379 are resistant. Transcriptomics data of all four strains are publicly available<sup>40,48,82</sup>. The *E. huxleyi* cultures were supplemented with the lytic virus EhV201<sup>22</sup>, whose genome data is publicly available<sup>83</sup>. Additionally, four *E. huxleyi* isolates, which were obtained during a mesocosm experiment (see below), were used for a targeted analysis of GSL composition: RCC6912, RCC6918, RCC6936 and RCC6961. Isolates RCC6912, RCC6918, RCC6936 are susceptible to viral infection by EhVM1, while isolate RCC6961 is resistant (Fig. 6b and Fig. S24). The lytic virus EhVM1 was isolated during the same mesocosm experiment and its genome data is publicly available<sup>54</sup>.

To isolate *E. huxleyi* strains from the mesocosm experiment, water samples were collected, and single *E. huxleyi* cells were sorted within two weeks of collection at the Roscoff Culture Collection (RCC) laboratories (<https://roscoff-culture-collection.org>). *E. huxleyi* RCC6912 and RCC6918 were isolated from bag 1 at day 10 of the experiment (June 3, 2018), during the bloom phase of *E. huxleyi*. *E. huxleyi* RCC6936 was isolated from bag 4 at day 13 of the experiment (June 6, 2018), also during the bloom phase of *E. huxleyi*. The resistant isolate RCC6961 was isolated from bag 7 at day 16 of the experiment (June 9, 2018), during the virus-induced demise of *E. huxleyi*<sup>51</sup>.

### Culture maintenance and viral infection experiments

Cells were cultured in modified K/2 medium (including replacement of organic phosphate with 18  $\mu\text{M}$   $\text{KH}_2\text{PO}_4$ )<sup>84</sup> in filtered and autoclaved seawater (FSW) supplemented with ampicillin (100  $\mu\text{g}$  per mL) and kanamycin (50  $\mu\text{g}$  per mL), and incubated at 18°C with a 16:8 h light:dark illumination cycle. A light intensity of 100  $\mu\text{mol photons m}^{-2} \text{s}^{-1}$  was provided by cool white light-emitting diode lights. In all infection experiments, EhV was added to the cultures at the exponential phase ( $5 \times 10^5$  to  $1 \times 10^6$  cells per mL) 2 h after the onset of the light period, at a ratio of 5:1 viral particles to *E. huxleyi* cells using a viral lysate derived from an infected *E. huxleyi* 374 culture. Growing cultures in the presence of antibiotics maintained a low basal abundance of bacteria throughout the experiments (Fig. S26). As previously shown, the lipid profile of *E. huxleyi* cultures does not change significantly in the presence of low levels of bacteria<sup>33</sup>.

### Enumeration of algae, virions and bacteria by flow cytometry

Algal cells were quantified using an Eclipse (iCyt) flow cytometer (Sony Biotechnology, Champaign, IL, USA, using ec800 version 1.3.7 software) equipped with a 488 nm solid state-air cooled laser (25 mW on the flow cell) and a standard filter setup. Algal cells were identified by plotting chlorophyll autofluorescence (em: 663-737 nm, see Fig. S27a). Virions and bacteria were quantified by flow cytometry (Fig. S27b), as described previously<sup>36,85</sup>. Briefly, samples were fixed with a final concentration of 0.5% glutaraldehyde for 30 min at 4°C, plunged into liquid nitrogen, and stored at -80°C until analysis. After thawing, 5  $\mu\text{L}$  of fixed sample were stained with 195  $\mu\text{L}$  SYBR gold (Invitrogen, Paisley, UK) prepared in Tris-EDTA buffer as instructed by the manufacturer (5  $\mu\text{L}$  SYBR gold in 50 mL Tris-EDTA), then incubated for 20



min at 80°C and cooled down to room temperature. Flow cytometric analysis was performed with excitation at 488 nm and emission at 525 nm. A threshold was applied based on the forward scatter signal to reduce the background noise. The gates ‘EhV’ and ‘Bacteria’ were set by comparing to reference samples containing either EhV201 or bacteria.

### **Chemicals and internal standards**

All solvents and metabolite standards were obtained at high purity. Methanol (Ultra Gradient high-performance liquid chromatography (HPLC) Grade) was purchased from J.T. Baker (Norway). Acetic acid (ULC/MS), acetonitrile (ULC/MS), isopropanol (ULC/MS) and methyl tert-butyl ether (MTBE, HPLC) were purchased from Bio-Lab (Jerusalem, Israel). Ammonium acetate ( $\geq 98\%$ , Optima LC/MS) was purchased from Fisher Scientific (Fair Lawn, NJ, USA). Water was purified by a Milli-Q system (resistivity 18.2 M $\Omega$  cm at 25°C, TOC < 5 ppb, Merck Millipore, Molsheim, France). For laboratory culture samples, a SL standard mixture containing ten SL species (Cer/Sph Mixture I, Avanti Polar Lipids, Alabaster, AL, USA, LM6002) was used as extraction standard mixture. For mesocosm samples, glycosylceramide (soy) d18:2/C16:0 ( $>98\%$ , Avanti Polar Lipids, 131304) was used as extraction standard, and isotopically-labeled d9-PC P-36:1 (P-18:0/18:1,  $>99\%$ , Sigma, 852475C) and d4-palmitic acid (d4-C16:0, 98%, Cambridge Isotope Laboratories, DLM-2893) were used as injection standards for ultra-performance LC-HRMS (UPLC-HRMS) analysis.

### **Extraction of cellular lipids in *E. huxleyi* cultures**

Cultures of *E. huxleyi* strains 2090, 373, 374 and 379 with and without addition of EhV were analyzed for cellular lipid composition at days 0, 1, 2 and 3 of the experiment in three biological replicates. At day 0, samples were collected 4 hours after the addition of EhV. The samples (30-150 mL of each culture, equivalent to  $\sim 5 \times 10^7$  cells per sample) were collected by vacuum filtration onto glass microfiber filters (grade GF/C, 47 mm in diameter, pre-combusted at 460°C for >8 h, GE Healthcare Whatman, Buckinghamshire, UK), immediately plunged into liquid nitrogen, and stored at -80°C until extraction<sup>32</sup>. In total, 96 biological samples were collected.

Lipid extraction was performed as previously described<sup>86</sup> with slight modifications. Briefly, biological triplicates were divided into three batches, with 32 samples in each batch. filters were placed in 15 mL glass tubes and extracted with 3 mL of a pre-cooled (-20°C) methanol:MTBE (1:3, v:v) solution containing sphingolipid standard mixture ( $\sim 150$  nM of each species). The samples were shaken for 30 min at 4°C and sonicated for 30 min. The samples were then supplemented with 1.5 mL water:methanol (3:1, v:v) solution, vortexed for 1 min, and centrifuged for 10 min at 3,200 $\times$ g and 4°C. The upper organic phase (1.5 mL) was transferred to 2 mL centrifuge tubes and dried under a flow of nitrogen (TurboVap LV, Biotage, Uppsala, Sweden). The polar phase was re-extracted with 1.5 mL of MTBE. The upper organic phase (2.25 mL) was combined with the organic phase from the first extraction and dried under a flow of nitrogen (TurboVap LV). The samples were stored at -80°C until UPLC-HRMS analysis. Two extraction blanks were collected following the same procedure using blank filters.

An additional analysis was performed to quantify several GSL species with higher sensitivity (Fig. S19). The samples (250 mL of each culture at the exponential phase,  $1-1.5 \times 10^6$  cells per mL, equivalent to  $\sim 4 \times 10^8$  cells per sample) were extracted as described above.

### Untargeted lipid profiling using UPLC-HRMS

Per batch, samples were thawed, re-dissolved in 300  $\mu$ L mobile phase B (see below), vortexed, sonicated for 10 min and centrifuged at  $20,800 \times g$  for 10 min at  $10^\circ\text{C}$ . The supernatants were transferred to 200  $\mu$ L glass inserts in autosampler vials and directly used for LC-MS analysis. A pooled quality control (QC) sample was generated by combining aliquots of 10  $\mu$ L from all biological samples. An aliquot of 1  $\mu$ L was analyzed using UPLC coupled to a photodiode detector (ACQUITY UPLC I-Class, Waters, Milford, MA, USA) and a quadrupole time-of-flight (QToF) mass spectrometer (SYNAPT G2 HDMS, Waters), as described previously<sup>86</sup> with slight modifications. Briefly, the chromatographic separation was performed on an ACQUITY UPLC BEH C8 column ( $2.1 \times 100$  mm, i.d., 1.7  $\mu$ m, Waters). Mobile phase A consisted of water with 1% 1 M ammonium acetate and 0.1% acetic acid. Mobile phase B consisted of acetonitrile:isopropanol (7:3) with 1% 1 M ammonium acetate and 0.1% acetic acid. The column was maintained at  $40^\circ\text{C}$  and the flow rate of the mobile phase was 0.4 mL per min. The chromatographic gradient was set as follows: 1 min 45% mobile phase A, linear decrease from 45% to 35% mobile phase A over 3 min, from 35% to 11% mobile phase A over 8 min and from 11% to 0% mobile phase A over 3 min, after which the column was first washed with 100% mobile phase B for 4 min and then returned to initial conditions over 0.5 min and equilibrated for 2.5 min (22 min total run time).

The PDA detector was set to 210-800 nm. A divert valve (Rheodyne) excluded 0-1 min and 20-22 min from injection to the mass spectrometer. The ESI source was set to  $120^\circ\text{C}$  source and  $400^\circ\text{C}$  desolvation temperature, 1.0 kV capillary voltage, and 40 eV cone voltage, using nitrogen as desolvation gas (800 L/h) and cone gas (20 L/h). The mass spectrometer was operated in full scan MS<sup>E</sup> resolution position ionization mode (25,000 at  $m/z$  556) over a mass range of 50-1200 Da alternating with 0.1 min scan time between low- (1 eV collision energy) and high-energy scan function (collision energy ramp of 15-35 eV). Leucine-enkephalin was used as lock-mass reference standard. Pooled QC samples were injected at the beginning, middle and end of each batch.

### Comparative analysis of untargeted lipid profiling data

Raw LC-MS files were converted from the vendor's format to the open-format 'netCDF' using a 'DataBridge' (MassLynx version 4.1). Pre-processing of the CDF files was done using the R<sup>87</sup> packages 'xcms'<sup>88</sup> and 'CAMERA'<sup>89</sup> obtained from the Bioconductor repository ([www.bioconductor.org](http://www.bioconductor.org)). This yielded a matrix of 12,190 aligned mass features across samples with corresponding peak intensity values. Parameters for mass feature detection, smoothing, alignment, binning and filtering were set according to the instrument's mass measurement specifications and detailed manual inspection of known mass features in the raw data, as suggested by the software guidelines (Table S8 and Table S9). The feature matrix was normalized to the total ion current (TIC, per sample) and standardized. The elbow method was applied to determine the number of clusters for a subset of samples (without addition of EhV, 48 samples,  $k = 4$ , Fig. S1a) and for the whole dataset (with and without addition of EhV, 96

samples,  $k = 4$ , Fig. S1b), followed by  $k$ -Means clustering and PCA analysis using the R package ‘factoextra’<sup>90</sup> for both the subset and the whole dataset.  $k$ -Means clustering ( $k = 5$ ) and PCA analysis were performed also for the whole dataset with the pooled QC samples, resulting in the same separation to clusters, while the pooled QC samples were grouped together in a fifth cluster (Fig. S28).

Comparative analysis between clusters 3, 4 (containing samples of resistant strains) and clusters 1, 2 (containing samples of susceptible strains) in the subset without addition of EhV (Fig. 1c) was performed by one-way ANOVA with FDR-correction ( $p < 0.01$ ) using the R package ‘qvalue’<sup>91</sup>, reducing the data to approximately 10,922 mass features. The mean intensity of each mass feature was then calculated for all clusters, followed by calculation of the fold change between the cluster with the maximum mean intensity and the other clusters. A fold change of  $> 20$  between the first and third highest clusters was selected, yielding a list of 173 differential mass features, which underwent further manual annotation to obtain a smaller number of feature groups. The peak shape of the extracted ion chromatograms (EICs) from co-eluting mass features was compared using MassLynx (Version 4.1, Waters), and isotopes, adducts and apparent neutral losses (e.g. of water) were annotated, grouping the mass features into 43 feature groups (Table S1). Next, the adduct ion with the highest intensity was selected for each feature group and the corresponding peak area was extracted using MassLynx and QuanLynx (Version 4.1, Waters) across samples in the full dataset (that is, with and without addition of EhV). Peak areas above a signal-to-noise threshold of 10 (limit of quantification) were normalized to the TIC. Per feature, zero values were replaced with half of the minimal value. Hierarchical cluster analysis was then applied to the whole data set (Fig. S2) and to the dataset after averaging the peak areas of the biological replicates (Fig. 2a) following log-transformation using Matlab R2021a, with row-wise (per feature) scaling, row- and column-wise clustering using the default ‘Euclidean’ method and the ‘redblue’ colour panel. Out of the 43 feature groups, nine were putatively identified as GSLs following manual annotation, based on the accurate mass, adducts and apparent in-source fragments.

### **Putative annotation and phenotypic grouping of GSL species**

The annotation of GSL species that were previously undescribed in the *E. huxleyi*-EhV model system (listed in Table 1) was based on LC-MS/MS analysis and the Lipid Maps computationally-generated database of lipid classes and the Lipid Maps Structure Database (LMSD)<sup>44</sup>, and carried out according to the Metabolomics Standards Initiative, ‘Level 2 – putatively annotated compounds’<sup>46</sup>. The annotation of previously described GSL species was performed according to the accurate mass and LC-MS/MS fragmentation pattern<sup>36,38,45,52</sup>. LC-MS/MS analyses were performed in positive ionization mode for the protonated molecules using a collision energy ramp of 10-45 eV and a scan time of 0.5 sec. Analyses were performed on samples with high intensities, with injection volumes of 3-5  $\mu$ L. The data were analysed and processed with MassLynx and QuanLynx (version 4.1, Waters). For MS/MS spectra and a list of fragments of the GSL species that were previously undescribed in the *E. huxleyi*-EhV model system, see Fig. S4-S17.

Quantification and phenotypic grouping of the GSL species (Table 1) was based on their abundance profiles in the different *E. huxleyi* strains in the presence and absence of EhV (Fig. S18 and Fig. S19). The abundance profiles were generated by normalizing the peak area of

each GSL species (extracted as described above) to the extraction standard (glucosylceramide d18:1/c12:0) and to the total number of extracted cells. Differences in GSL abundance were tested for day 2 of the experiment by a one-way ANOVA followed by Tukey's post-hoc test,  $p < 0.01$  (Table S10 and Table S11). Day 2 was chosen since it was the first time point in which infected samples appeared as a separate cluster in the  $k$ -means clustering analysis (Fig. 1d).

### Definition of *sld* and *sbh* genes

The *sld* and *sbh* genes were predicted from *E. huxleyi* genome sequences<sup>82</sup>, and defined based on expressed sequences when available: expressed sequence tags (ESTs) and Illumina short read sequences<sup>40</sup>, as described in<sup>92</sup>.

Five SLDs and seven SBHs were defined. All SLDs have the fatty acid desaturase domain (PF00487), while the SBHs have the fatty acid hydroxylase domain (PF04116). *sld2* (KJ868223, called Dcd2) and *sbh1* (KJ868226, called sphinganine hydroxylase 1) were deposited in GenBank from our earlier definitions<sup>31</sup>. The genes were redefined based on PacBio RNASeq long read sequences, and *sld1-sld5* and *sbh1, sbh2, sbh4-sbh7* sequences from the susceptible strain *E. huxleyi* 2090 and the resistant strain *E. huxleyi* 373 (either one, the other or both strains, depending on expression) were deposited in GenBank, and given accession numbers: MZ152812-MZ152827 (Table S4). *sbh3* was not expressed in any condition checked, and therefore was not submitted to GenBank. The sequence is available, with all others used for the phylogenetic analysis, in Figshare: 10.6084/m9.figshare.20448579. Expression patterns of *sld* and *sbh* genes were based on data from previously published studies<sup>31,40,48</sup>.

### Phylogenetic analysis of SLD and SBH

Database searches were performed to find similar proteins using BlastP at NCBI<sup>93</sup> against the nr database, allowing 250 hits (to find more distantly related sequences). As the *E. huxleyi* SLD and SBH proteins differed greatly from each other within each protein family, sequences to represent each branch of the families were chosen, to give as wide an evolutionary spread as possible, while trying to keep consistency in the choice of species (if a species had hits to multiple family members, it was preferred, though species that only matched individual branches were also chosen, Table S5 and Table S6). All sequences were required to have the domains that define the family. Domain searches were performed using the Pfam (<http://pfam.xfam.org/>) and CDD (<https://www.ncbi.nlm.nih.gov/Structure/bwrpsb/bwrpsb.cgi>) databases<sup>94,95</sup>. Multiple alignments were performed on both whole protein and domain only, using ClustalW2.1<sup>96</sup>, Muscle 3.8.31<sup>97</sup> in local installations, and in the case of SLDs, Mafft V7 online (<https://mafft.cbrc.jp/alignment/server/>)<sup>98</sup>. Due to the differences in the overall lengths of the proteins, the alignments chosen for the final phylogenetic analyses are those of the domains, as found in CDD. For SLD, as the subfamilies differed strongly even within the domain, Mafft using the L-INS-i algorithm gave the best alignment (Fig. S29). For the SBHs, the alignments were very similar, and the ClustalW alignment was used (Fig. S30). Phylogenetic analysis was performed with ClustalW (Neighbor-joining) and Phylip 3.697 (ProML, maximum likelihood)<sup>99</sup> in local installations and PhyML 3.0 (maximum likelihood) online (<http://www.atgc-montpellier.fr/phyml/>)<sup>100</sup>. The topologies were similar, and the PhyML trees are shown. Trees were visualized with iTol (<https://itol.embl.de/>)<sup>101</sup>. Details of the amino acid sequences are



listed in Table S5 (SLD) and Table S6 (SBH). Full sequences, domain sequences and alignments are available in Figshare: 10.6084/m9.figshare.20448579.

### **Extraction and lipid profiling of a *E. huxleyi* bloom in the Celtic Sea**

Water samples of a natural *E. huxleyi* bloom were collected during the ‘Tara Breizh Bloom’ cruise in the Celtic Sea from May 29 to June 2, 2019<sup>50</sup>. Water samples of 50 L were first filtered through a 20 µm nylon net to remove large particles. Cells were then collected by vacuum filtration onto glass microfiber filters (grade GF/C, 125 mm in diameter, pre-combusted at 460°C for > 5 h, GE Healthcare Whatman). The filters were transferred to 50 mL centrifuge tubes (Sarstedt, Nümbrecht, Germany) and immediately plunged into liquid nitrogen. The filters were kept at -80°C, freeze-dried (Gamma 2-16 LSCplus, Martin Christ, Osterode am Harz, Germany) within 6 months after collection, and stored at -80°C until further processing. Lipid extraction was performed as described above, using different solution volumes: 20 mL of the pre-cooled (-20°C) methanol:MTBE (1:3, v:v) solution containing sphingolipid standard mixture (~150 nM of each species), 15 mL of water:methanol (3:1, v:v) solution, and 11 mL of MTBE for re-extraction. The upper organic phase (11 mL for the first extraction, 15 mL for the second extraction) was dried under a flow of nitrogen (TurboVap LV). An extraction blank was collected following the same procedure using a blank filter.

Untargeted profiling of lipids using UPLC-HRMS was performed as described above. An aliquot of 2 µL was analyzed using LC-HRMS as described above. The chromatographic separation was performed on an ACQUITY UPLC BEH C8 column (2.1×100 mm, i.d., 1.7 µm, Waters) attached to a VanGuard pre-column (5 × 2.1 mm, 1.7 µm; Waters). Mobile phase A consisted of water:acetonitrile:isopropanol (4.50:3.85:1.65, v:v) with 1% 1 M ammonium acetate and 0.1% acetic acid. Mobile phase B consisted of acetonitrile:isopropanol (7:3, v:v) with 1% 1 M ammonium acetate and 0.1% acetic acid. The column was maintained at 40°C and the flow rate of the mobile phase was 0.4 mL per min. The chromatographic gradient was set as follows: 1 min 100% mobile phase A, linear from 100% to 25% mobile phase A over 11 min and from 25% to 0% mobile phase A over 3 min, after which the column was first washed with 100% mobile phase B for 6 min and then returned to initial conditions (100% mobile phase A) over 0.5 min and equilibrated for 3.5 min (25 min total run time). The mass spectrometer was operated as described above over a mass range of 50-1500 Da.

Identification of GSL species was based on characteristic neutral losses and fragments of LCBs and amino FAs following collision-induced dissociation in MS<sup>E</sup> mode. Relative intensity of hGSL, sGSL and 374-GSL species was performed by extracting the peak area of the adduct ion with the highest intensity or an indicative fragment ion ( $[M+Na]^+$  for hGSL,  $[M+H-(Sialic\ acid-H)-H_2O]^+$  for sGSL and  $[Amino\ FA+H-H_2O]^+$  for 374-GSL species) following collision-induced dissociation in MS<sup>E</sup> mode using QuanLynx. LC-MS/MS operating in multiple reaction monitoring (MRM) mode was used to quantify resGSL d19:4/h22:2 (**12**) with increased sensitivity. Data was acquired as described above using the MRM mode, incorporating the observed retention times and accurate masses of precursor and product ions, using a collision energy of 20 eV. The most intense product ion of the d19:4 LCB ( $m/z$  272.2378) was selected for target enhancement and the product ion of the h22:2 amino FA ( $m/z$  334.3110) was used for quantification. Peak areas above a signal-to-noise threshold of 10 (limit of quantification) were normalized to the internal standard and the filtered volume.

## Mesocosm experimental setup

A mesocosm experiment (AQUACOSM VIMS-Ehux) was carried out over 24 days (May 24 – June 17, 2018) in Raunefjorden at the University of Bergen's Marine Biological Station Espesgrend, Norway (60.38° N; 5.28° E), as previously described<sup>51,52</sup>. Briefly, the experiment consisted of seven enclosure bags made of transparent polyethylene (11 m<sup>3</sup>, 4 m deep and 2 m wide, 90% photosynthetically active radiation) mounted on floating frames and moored to a raft stationed in the fjord. Each bag was filled with surrounding fjord water and supplemented with nutrients. Samples for flow cytometric counts were taken twice a day, in the morning (7 am) and evening (8-9 pm) using 50 mL centrifugal tubes and following filtration using a 40 µm cell strainer. Calcified *E. huxleyi* cells were enumerated using an Eclipse iCyt flow cytometer (Sony Biotechnology).

## Enumeration of biomass-associated EhV in the environment by qPCR

Water samples (1-2 L) were sequentially filtered by vacuum through hydrophilic polycarbonate filters with a pore size of 20 µm (47 mm; Sterlitech, Kent, WA, US) and then 2 µm (Isopore, 47 mm; Merck Millipore, Cork, Ireland). Filters were immediately plunged into liquid nitrogen and stored at -80°C until further processing. DNA was extracted from the 2 µm filters using the DNeasy PowerWater kit (QIAGEN, Hilden, Germany) according to the manufacturer's instructions. Each DNA extract was diluted 100 times, and 1 µL was then used for qPCR analysis as described in<sup>52</sup>. Briefly, EhV abundance was determined for the major capsid protein (*mcp*) gene<sup>102</sup>: 5'-acgcaccctcaatgtatggaagg-3' (*mcp1Fw*<sup>47</sup>) and 5'-rtscrgccaactcagcagtcgt-3' (*mcp94Rv*<sup>52</sup>). Results were calibrated against serial dilutions of EhV201 DNA at known concentrations, enabling exact enumeration of viruses. Data is available in<sup>103</sup>.

## Sampling, extraction, and cellular lipid profiling of mesocosm samples

Water samples for cellular lipidomics analysis were collected daily from bags 1-4, as described previously<sup>52</sup>. Briefly, samples were collected daily at 7-8.30 am using 10 L carboys (pre-cleaned with 1% HCl for > 10 min and rinsed three times with tap water) using a peristaltic pump at a speed of ca. 5 L per min. The samples were pumped through a 200 µm pore-size Nitex nylon mesh screen to remove microzooplankton grazers and large particles. Carboys were kept at 10°C and processed < 1 h after collection.

Water samples of 1-6 L (depending on the biomass) were first gravity filtered through 25 µm pore-size stainless steel filters (47 mm in diameter, Sinun Tech) to remove large particles. Cells were then collected by gentle vacuum filtration of 1-2 L onto glass microfiber filters (grade GF/A, 47 mm in diameter, pre-combusted at 460°C for > 5 h, GE Healthcare Whatman). The filters were transferred to 2.0 mL centrifuge tubes (SafeLock, Eppendorf) using stainless steel tweezers (pre-combusted at 460°C for > 5 h), supplemented with 5 µL of glycosylceramide d18:2/C16:0 (3 µg per µL in chloroform:methanol, 1:1 v:v) and immediately plunged into liquid nitrogen. An extraction blank was taken by soaking a glass microfiber filter in FSW, after which it was transferred to a 2.0 mL centrifuge tube and immediately plunged into liquid nitrogen. The filters were kept at -80°C, freeze-dried (Gamma 2-16 LSCplus, Martin Christ) within 1.5 months after collection, and stored at -80°C until further processing. Lipid extraction was performed for bag samples in days 10-23 (56 biological samples in total) and for the



extraction blank as described for the laboratory samples, without the addition of a sphingolipid internal standard mixture and including two solvent blanks.

Untargeted profiling of lipids using UPLC-HRMS was performed as described above, with the following modifications: samples were randomized and divided into two batches with 30 samples in each batch, including extraction and solvent blanks. Randomization was performed automatically using an in-house R<sup>87</sup> script with the following constraints: every bag was equally represented in each analytical batch and each experimental sampling day was represented at least once. Per batch, samples were thawed, re-dissolved in 220  $\mu$ L mobile phase B containing d9-PC P-36:1 (0.5  $\mu$ g per mL) and d4-palmitic acid (0.7  $\mu$ g per mL) as injection standards, vortexed, sonicated for 10 min, and centrifuged at 20,800 $\times$ g for 10 min at 10°C. The supernatants were transferred to 200  $\mu$ L glass inserts in autosampler vials and directly used for LC-MS analysis. A pooled QC sample was generated by combining aliquots of 10  $\mu$ L from all biological samples. An aliquot of 1  $\mu$ L was analyzed using LC-HRMS as described above. The chromatographic separation was performed as described above for the Celtic Sea samples.

Identification of GSL species was performed as described above using LC-MS/MS analyses (see Fig. S31-S33 for fragmentation patterns of representative hGSL, sGSL and vGSL species). Absolute quantification of most GSL species was performed by extracting the peak area of the adduct ion with the highest intensity or an indicative fragment ion ( $[M+Na]^+$  for most GSL species,  $[M+H-(Sialic\ acid-H)-H_2O]^+$  for sGSL and  $[Amino\ FA+H-H_2O]^+$  for 374-GSL species) following collision-induced dissociation in MS<sup>E</sup> mode using QuanLynx. LC-MS/MS operating in MRM mode was used to quantify group B GSL species with increased sensitivity. Data was acquired as described above using the MRM mode, incorporating the observed retention times and accurate masses of precursor and product ions, using a collision energy of 20 eV. The most intense product ion of the LCB ( $m/z$  284.2953 for d18:0-based GSL species and  $m/z$  300.2903 for t18:0-based GSL species) was selected for target enhancement and used for quantification. Peak areas above a signal-to-noise threshold of 10 (limit of quantification) were normalized to the internal standard and the filtered volume.

### **GSL profiling of naïve and recovered cultures of the mesocosm-derived *E. huxleyi* isolates**

EhVM1 was added to cultures of *E. huxleyi* isolates RCC6912, RCC6918, RCC6936 and RCC6961 at a ratio of 1:1 viral particles to *E. huxleyi* cells, as described above. Of the three susceptible isolates, isolates RCC6912 and RCC6918 recovered about a week following infection (Fig. 6b and Fig. S24b). The recovered cultures were continuously refreshed in modified K/2 medium, until no EhV was detected using flow cytometry.

*E. huxleyi* cultures of mesocosm isolates were analyzed for cellular lipid content at the exponential phase in three biological replicates ( $1\times 10^6$  to  $2.5\times 10^6$  cells per mL, see Fig. S25c). The samples (100-150 mL of each culture, equivalent to  $\sim 2\times 10^8$  cells per sample) were collected by gentle vacuum filtration onto glass microfiber filters (grade GF/A, 47 mm in diameter, pre-combusted at 460°C for > 5 h, GE Healthcare Whatman), immediately plunged into liquid nitrogen, and stored at -80°C until extraction. In total, 18 biological samples were collected. Lipid extraction was performed as described for the laboratory strains, including three extractions blanks. Untargeted profiling of lipids using UPLC-HRMS was performed as described for the mesocosm samples, using 200  $\mu$ L mobile phase B for re-dissolving samples.

The samples were injected in one batch, including an extraction blank and a pooled QC sample. Absolute quantification of GSL species was performed as described for the laboratory strains, by normalizing the peak area of each GSL species to the extraction standard (glucosylceramide d18:1/c12:0) and to the total number of extracted cells. Heatmaps were generated using R<sup>87</sup> with column-wise (per GSL species) normalization and the ‘GnBu’ color panel of the package ‘RcolorBrewer’ (Fig. 6c,d and Fig. S25b).

**Acknowledgements:** We thank all team members of the AQUACOSM VIMS-Ehux project for setting up and conducting the mesocosm experiment, especially Jorun Egge, Aud Larsen, Tatiana Tsagaraki, Celia Marrasé and Rafel Simó. We thank Ian Probert and Martin Gachenot for isolating and maintaining the *E. huxleyi* strains during the mesocosm experiment. We are grateful to the Tara Ocean Foundation, led by Romain Troublé and Etienne Bourgois, for the sampling opportunity and facilities onboard Tara, and to all the scientific and logistic team involved in the Tara Breizh Bloom cruise, notably captain Martin Herteau and his crew, the chief scientist Christian Jeanthon, and Colombar de Vargas. We are grateful to Ilana Rogachev for technical support on the LC-MS instrument. We thank Roi Avraham, Noa Ben-Moshe and Ron Rotkopf for their help in data analysis. **Funding:** A.V. is The Bronfman Professorial Chair of Plant Science. This research was supported by the European Research Council CoG (VIROCELLSPHERE grant no. 681715), the Simons Foundation grant (no. 735079) ‘Untangling the infection outcome of host-virus dynamics in algal blooms in the ocean’, and a research grant from the Estate of Bernard Berkowitz awarded to A.V. The mesocosm experiment VIMS-Ehux was supported by EU Horizon2020-INFRAIA project AQUACOSM (grant no. 731065).

**Author contributions:** G.S., C.Z. and A.V. conceptualized the project. G.S., C.K. and A.V. wrote the manuscript. G.S., C.K., C.Z. and S.M. designed and performed the experiments. G.S., C.K. and C.Z. performed the LC-MS data analysis. S.B.-D and G.S. performed the bioinformatics analyses. D.S. collected the open ocean samples. All authors reviewed and edited the manuscript.

**Competing interests:** The authors declare that they have no competing interests.

**Data availability:** Data supporting the findings of this study are available in the paper and its Supplementary Materials. Flow cytometry, qPCR, nutrient and temperature data from the mesocosm experiment are available in Dryad (<https://doi.org/10.5061/dryad.q573n5tfr>). Mass spectral raw data was deposited to the EMBL-EBI MetaboLights repository with the identifier MTBLS3323 ([www.ebi.ac.uk/metabolights/MTBLS3323](http://www.ebi.ac.uk/metabolights/MTBLS3323)). Raw data files of biological samples from the laboratory, ‘Tara Breizh Bloom’ cruise and mesocosm experiments include full MS and MS/MS analyses in positive ionization mode. Nucleotide sequences were deposited in GenBank and given accession numbers: MZ152812-MZ152827. Full sequences, domain sequences and alignments used for the phylogenetic analysis are available on Figshare: 10.6084/m9.figshare.20448579.

### **Supplementary Materials:**

Figures S1 to S34

Tables S1 to S11

## References

- 1 Bergh, Ø., Børsheim, K. Y., Bratbak, G. & Heldal, M. High abundance of viruses found in aquatic environments. *Nature* **340**, 467-468 (1989).
- 2 Wommack, K. E. & Colwell, R. R. Virioplankton: Viruses in aquatic ecosystems. *Microbiol. Mol. Biol. Rev.* **64**, 69-114 (2000).
- 3 Weitz, J. S. *et al.* A multitrophic model to quantify the effects of marine viruses on microbial food webs and ecosystem processes. *ISME J.* **9**, 1352-1364 (2015).
- 4 Suttle, C. A. Marine viruses — major players in the global ecosystem. *Nat. Rev. Microbiol.* **5**, 801-812 (2007).
- 5 Fuhrman, J. A. Marine viruses and their biogeochemical and ecological effects. *Nature* **399**, 541-548 (1999).
- 6 Wilhelm, S. W. & Suttle, C. A. Viruses and nutrient cycles in the sea: Viruses play critical roles in the structure and function of aquatic food webs. *BioScience* **49**, 781-788 (1999).
- 7 Sullivan, M. B., Weitz, J. S. & Wilhelm, S. Viral ecology comes of age. *Environ. Microbiol. Rep.* **9**, 33-35 (2017).
- 8 Baran, N., Goldin, S., Maidanik, I. & Lindell, D. Quantification of diverse virus populations in the environment using the polony method. *Nat. Microbiol.* **3**, 62-72 (2018).
- 9 Pasulka, A. L. *et al.* Interrogating marine virus-host interactions and elemental transfer with BONCAT and nanoSIMS-based methods. *Environ. Microbiol.* **20**, 671-692 (2018).
- 10 Vincent, F., Sheyn, U., Porat, Z., Schatz, D. & Vardi, A. Visualizing active viral infection reveals diverse cell fates in synchronized algal bloom demise. *Proc. Natl. Acad. Sci. USA* **118**, e2021586118 (2021).
- 11 Allers, E. *et al.* Single-cell and population level viral infection dynamics revealed by phageFISH, a method to visualize intracellular and free viruses. *Environ. Microbiol.* **15**, 2306-2318 (2013).
- 12 Castillo, Y. M. *et al.* Visualization of viral infection dynamics in a unicellular eukaryote and quantification of viral production using virus fluorescence *in situ* hybridization. *Front. Microbiol.* **11**, 1559 (2020).
- 13 Ku, C. *et al.* A single-cell view on alga-virus interactions reveals sequential transcriptional programs and infection states. *Sci. Adv.* **6**, eaba4137 (2020).
- 14 Piel, D. *et al.* Phage–host coevolution in natural populations. *Nat. Microbiol.* **7**, 1075-1086 (2022).
- 15 Yau, S. *et al.* A viral immunity chromosome in the marine picoeukaryote, *Ostreococcus tauri*. *PLoS Path.* **12**, e1005965 (2016).
- 16 Frada, M., Probert, I., Allen, M. J., Wilson, W. H. & de Vargas, C. The “Cheshire Cat” escape strategy of the coccolithophore *Emiliana huxleyi* in response to viral infection. *Proc. Natl. Acad. Sci. USA* **105**, 15944-15949 (2008).
- 17 Jacobsen, A., Larsen, A., Martínez Martínez, J., Verity, P. G. & Frischer, M. E. Susceptibility of colonies and colonial cells of *Phaeocystis pouchetii* (Haptophyta) to viral infection. *Aquat. Microb. Ecol.* **48**, 105-112 (2007).
- 18 Martínez Martínez, J. *et al.* New lipid envelope-containing dsDNA virus isolates infecting *Micromonas pusilla* reveal a separate phylogenetic group. *Aquat. Microb. Ecol.* **74**, 17-28 (2015).
- 19 Tarutani, K., Nagasaki, K. & Yamaguchi, M. Viral impacts on total abundance and clonal composition of the harmful bloom-forming phytoplankton *Heterosigma akashiwo*. *Appl. Environ. Microbiol.* **66**, 4916-4920 (2000).

- 20 Tomaru, Y., Mizumoto, H. & Nagasaki, K. Virus resistance in the toxic bloom-forming dinoflagellate *Heterocapsa circularisquama* to single-stranded RNA virus infection. *Environ. Microbiol.* **11**, 2915-2923 (2009).
- 21 Thomas, R. *et al.* Acquisition and maintenance of resistance to viruses in eukaryotic phytoplankton populations. *Environ. Microbiol.* **13**, 1412-1420 (2011).
- 22 Schroeder, D. C., Oke, J., Malin, G. & Wilson, W. H. Coccolithovirus (*Phycodnaviridae*): Characterisation of a new large dsDNA algal virus that infects *Emiliana huxleyi*. *Arch. Virol.* **147**, 1685-1698 (2002).
- 23 Holligan, P. M. *et al.* A biogeochemical study of the coccolithophore, *Emiliana huxleyi*, in the North Atlantic. *Global Biogeochem. Cycles* **7**, 879-900 (1993).
- 24 Brown, C. W. & Yoder, J. A. Coccolithophorid blooms in the global ocean. *J. Geophys. Res.* **99**, 7467-7482 (1994).
- 25 Harris, R. P. Zooplankton grazing on the coccolithophore *Emiliana huxleyi* and its role in inorganic carbon flux. *Mar. Biol.* **119**, 431-439 (1994).
- 26 Stefels, J., Steinke, M., Turner, S., Malin, G. & Belviso, S. Environmental constraints on the production and removal of the climatically active gas dimethylsulphide (DMS) and implications for ecosystem modelling. *Biogeochemistry* **83**, 245-275 (2007).
- 27 Bratbak, G., Egge, J. K. & Heldal, M. Viral mortality of the marine alga *Emiliana huxleyi* (Haptophyceae) and termination of algal blooms. *Mar. Ecol. Prog. Ser.* **93**, 39-48 (1993).
- 28 Lehahn, Y. *et al.* Decoupling physical from biological processes to assess the impact of viruses on a mesoscale algal bloom. *Curr. Biol.* **24**, 2041-2046 (2014).
- 29 Laber, C. P. *et al.* Coccolithovirus facilitation of carbon export in the North Atlantic. *Nat. Microbiol.* **3**, 537-547 (2018).
- 30 Wilson, W. H. *et al.* Isolation of viruses responsible for the demise of an *Emiliana huxleyi* bloom in the English Channel. *J. Mar. Biol. Assoc. U.K.* **82**, 369-377 (2002).
- 31 Rosenwasser, S. *et al.* Rewiring host lipid metabolism by large viruses determines the fate of *Emiliana huxleyi*, a bloom-forming alga in the ocean. *Plant Cell* **26**, 2689-2707 (2014).
- 32 Malitsky, S. *et al.* Viral infection of the marine alga *Emiliana huxleyi* triggers lipidome remodeling and induces the production of highly saturated triacylglycerol. *New Phytol.* **210**, 88-96 (2016).
- 33 Schleyer, G. *et al.* In plaque-mass spectrometry imaging of a bloom-forming alga during viral infection reveals a metabolic shift towards odd-chain fatty acid lipids. *Nat. Microbiol.* **4**, 527-538 (2019).
- 34 Evans, C., Pond, D. W. & Wilson, W. H. Changes in *Emiliana huxleyi* fatty acid profiles during infection with *E. huxleyi* virus 86: Physiological and ecological implications. *Aquat. Microb. Ecol.* **55**, 219-228 (2009).
- 35 Wilson, W. H. *et al.* Complete genome sequence and lytic phase transcription profile of a *Coccolithovirus*. *Science* **309**, 1090-1092 (2005).
- 36 Ziv, C. *et al.* Viral serine palmitoyltransferase induces metabolic switch in sphingolipid biosynthesis and is required for infection of a marine alga. *Proc. Natl. Acad. Sci. USA* **113**, E1907-E1916 (2016).
- 37 Vardi, A. *et al.* Viral glycosphingolipids induce lytic infection and cell death in marine phytoplankton. *Science* **326**, 861-865 (2009).
- 38 Fulton, J. M. *et al.* Novel molecular determinants of viral susceptibility and resistance in the lipidome of *Emiliana huxleyi*. *Environ. Microbiol.* **16**, 1137-1149 (2014).
- 39 Vardi, A. *et al.* Host-virus dynamics and subcellular controls of cell fate in a natural coccolithophore population. *Proc. Natl. Acad. Sci. USA* **109**, 19327-19332 (2012).



- 40 Feldmesser, E., Ben-Dor, S. & Vardi, A. An *Emiliana huxleyi* pan-transcriptome reveals basal strain specificity in gene expression patterns. *Sci. Rep.* **11**, 20795-20795 (2021).
- 41 Bidle, K. D. & Kwityn, C. J. Assessing the role of caspase activity and metacaspase expression on viral susceptibility of the coccolithophore, *Emiliana huxleyi* (Haptophyta). *J. Phycol.* **48**, 1079-1089 (2012).
- 42 Frada, M. J. *et al.* Morphological switch to a resistant subpopulation in response to viral infection in the bloom-forming coccolithophore *Emiliana huxleyi*. *PLoS Path.* **13**, e1006775 (2017).
- 43 Nissimov, J. I. *et al.* Biochemical diversity of glycosphingolipid biosynthesis as a driver of *Coccolithovirus* competitive ecology. *Environ. Microbiol.* **21**, 2182-2197 (2019).
- 44 Sud, M. *et al.* LMSD: LIPID MAPS structure database. *Nucleic Acids Res.* **35**, D527-D532 (2007).
- 45 Hunter, J. E., Frada, M. J., Fredricks, H. F., Vardi, A. & Van Mooy, B. A. S. Targeted and untargeted lipidomics of *Emiliana huxleyi* viral infection and life cycle phases highlights molecular biomarkers of infection, susceptibility, and ploidy. *Front. Mar. Sci.* **2**, 81 (2015).
- 46 Sumner, L. W. *et al.* Proposed minimum reporting standards for chemical analysis Chemical Analysis Working Group (CAWG) Metabolomics Standards Initiative (MSI). *Metabolomics* **3**, 211-221 (2007).
- 47 Pagarete, A., Allen, M. J., Wilson, W. H., Kimmance, S. a. & de Vargas, C. Host-virus shift of the sphingolipid pathway along an *Emiliana huxleyi* bloom: Survival of the fittest. *Environ. Microbiol.* **11**, 2840-2848 (2009).
- 48 Keeling, P. J. *et al.* The Marine Microbial Eukaryote Transcriptome Sequencing Project (MMETSP): Illuminating the functional diversity of eukaryotic life in the oceans through transcriptome sequencing. *PLoS Biol.* **12**, e1001889 (2014).
- 49 Michaelson, L. V., Dunn, T. M. & Napier, J. A. Viral trans-dominant manipulation of algal sphingolipids. *Trends Plant Sci.* **15**, 651-655 (2010).
- 50 Câmara dos Reis, M. *et al.* Exploring the phycosphere of *Emiliana huxleyi*: From bloom dynamics to microbiome assembly experiments. *bioRxiv*, 2022.2002.2021.481256 (2022).
- 51 Vincent, F. *et al.* Viral infection switches the balance between bacterial and eukaryotic recyclers of organic matter during algal blooms. *bioRxiv* (2021).
- 52 Kuhlisch, C. *et al.* Viral infection of algal blooms leaves a unique metabolic footprint on the dissolved organic matter in the ocean. *Sci. Adv.* **7**, eabf4680 (2021).
- 53 Egge, J. K. & Heimdal, B. R. Blooms of phytoplankton including *Emiliana huxleyi* (Haptophyta). Effects of nutrient supply in different N : P ratios. *Sarsia* **79**, 333-348 (1994).
- 54 Fromm, A., Schatz, D., Ben-Dor, S., Feldmesser, E. & Vardi, A. Complete genome sequence of *Emiliana huxleyi* virus strain M1, isolated from an induced *E. huxleyi* bloom in Bergen, Norway. *Microbiol. Resour. Announc.* **11**, e00071-22 (2022).
- 55 Waterbury, J. B. & Valois, F. W. Resistance to co-occurring phages enables marine *Synechococcus* communities to coexist with cyanophages abundant in seawater. *Appl. Environ. Microbiol.* **59**, 3393-3399 (1993).
- 56 Avrani, S., Wurtzel, O., Sharon, I., Sorek, R. & Lindell, D. Genomic island variability facilitates *Prochlorococcus*-virus coexistence. *Nature* **474**, 604-608 (2011).
- 57 Kegel, J. U., John, U., Valentin, K. & Frickenhaus, S. Genome variations associated with viral susceptibility and calcification in *Emiliana huxleyi*. *PLoS ONE* **8**, e80684 (2013).



- 58 Li, Y. *et al.* Sphingolipids in marine microalgae: Development and application of a mass spectrometric method for global structural characterization of ceramides and glycosphingolipids in three major phyla. *Anal. Chim. Acta* **986**, 82-94 (2017).
- 59 Li, H. *et al.* Comparative lipid profile of four edible shellfishes by UPLC-Triple TOF-MS/MS. *Food Chem.* **310**, 125947 (2020).
- 60 Wang, R. *et al.* Identification of ceramide 2-aminoethylphosphonate molecular species from different aquatic products by NPLC/Q-Exactive-MS. *Food Chem.* **304**, 125425 (2020).
- 61 Kato, H. *et al.* Recognition of pathogen-derived sphingolipids in *Arabidopsis*. *Science* **376**, 857-860 (2022).
- 62 Marquês, J. T., Marinho, H. S. & de Almeida, R. F. M. Sphingolipid hydroxylation in mammals, yeast and plants – An integrated view. *Prog. Lipid Res.* **71**, 18-42 (2018).
- 63 Santos, T. C. B. *et al.* The long chain base unsaturation has a stronger impact on 1-deoxy(methyl)-sphingolipids biophysical properties than the structure of its C1 functional group. *Biochim. Biophys. Acta* **1863**, 183628 (2021).
- 64 Ali, U., Li, H., Wang, X. & Guo, L. Emerging roles of sphingolipid signaling in plant response to biotic and abiotic stresses. *Mol. Plant* **11**, 1328-1343 (2018).
- 65 Zhou, Y. *et al.* The sphingolipid biosynthetic enzyme *Sphingolipid delta8 desaturase* is important for chilling resistance of tomato. *Sci. Rep.* **6**, 38742-38742 (2016).
- 66 Mamode Cassim, A. *et al.* Sphingolipids in plants: A guidebook on their function in membrane architecture, cellular processes, and environmental or developmental responses. *FEBS Lett.* **594**, 3719-3738 (2020).
- 67 Schneider-Schaulies, J. & Schneider-Schaulies, S. Sphingolipids in viral infection. *Biol. Chem.* **396**, 585-595 (2015).
- 68 Orchard, R. C., Wilen, C. B. & Virgin, H. W. Sphingolipid biosynthesis induces a conformational change in the murine norovirus receptor and facilitates viral infection. *Nat. Microbiol.* **3**, 1109-1114 (2018).
- 69 Törnquist, K., Asghar, M. Y., Srinivasan, V., Korhonen, L. & Lindholm, D. Sphingolipids as modulators of SARS-CoV-2 infection. *Front. Cell Dev. Biol.* **9**, 689854 (2021).
- 70 Soudani, N., Hage-Sleiman, R., Karam, W., Dbaibo, G. & Zaraket, H. Ceramide suppresses influenza a virus replication *in vitro*. *J. Virol.* **93**, e00053-19 (2019).
- 71 Bukrinsky, M. I., Mukhamedova, N. & Sviridov, D. Lipid rafts and pathogens: The art of deception and exploitation. *J. Lipid Res.* **61**, 601-610 (2020).
- 72 Mackinder, L. C. M. *et al.* A unicellular algal virus, *Emiliania huxleyi* virus 86, exploits an animal-like infection strategy. *J. Gen. Virol.* **90**, 2306-2316 (2009).
- 73 Grossi, V., Raphel, D., Aubert, C. & Rontani, J.-F. The effect of growth temperature on the long-chain alkenes composition in the marine coccolithophorid *Emiliania huxleyi*. *Phytochemistry* **54**, 393-399 (2000).
- 74 Wördenweber, R. *et al.* Phosphorus and nitrogen starvation reveal life-cycle specific responses in the metabolome of *Emiliania huxleyi* (Haptophyta). *Limnol. Oceanogr.* **63**, 203-226 (2017).
- 75 Lowenstein, D. P., Mayers, K., Fredricks, H. F. & Van Mooy, B. A. S. Targeted and untargeted lipidomic analysis of haptophyte cultures reveals novel and divergent nutrient-stress adaptations. *Org. Geochem.* **161**, 104315 (2021).
- 76 Del Poeta, M., Nimrichter, L., Rodrigues, M. L. & Luberto, C. Synthesis and biological properties of fungal glucosylceramide. *PLoS Path.* **10**, e1003832 (2014).
- 77 Mashima, R., Okuyama, T. & Ohira, M. Biosynthesis of long chain base in sphingolipids in animals, plants and fungi. *Future Sci. OA* **6**, FSO434 (2019).

- 78 Ruiz, E., Oosterhof, M., Sandaa, R.-A. A., Larsen, A. & Pagarete, A. Emerging  
interaction patterns in the *Emiliana huxleyi*-EhV system. *Viruses* **9**, 61 (2017).
- 79 Thyrhaug, R., Larsen, A., Thingstad, T. F. & Bratbak, G. Stable coexistence in marine  
algal host-virus systems. *Mar. Ecol. Prog. Ser.* **254**, 27-35 (2003).
- 80 Baumeister, T. U. H., Vallet, M., Kaftan, F., Svatoš, A. & Pohnert, G. Live single-cell  
metabolomics with matrix-free laser/desorption ionization mass spectrometry to  
address microalgal physiology. *Front. Plant Sci.* **10**, 172 (2019).
- 81 Li, Z. *et al.* Single-cell lipidomics with high structural specificity by mass spectrometry.  
*Nat. Commun.* **12**, 2869 (2021).
- 82 Read, B. A. *et al.* Pan genome of the phytoplankton *Emiliana* underpins its global  
distribution. *Nature* **499**, 209-213 (2013).
- 83 Nissimov, J. I. *et al.* Draft genome sequence of four coccolithoviruses: *Emiliana*  
*huxleyi* virus EhV-88, EhV-201, EhV-207, and EhV-208. *J. Virol.* **86**, 2896-2897  
(2012).
- 84 Gerecht, A. C., Šupraha, L., Edvardsen, B., Probert, I. & Henderiks, J. High  
temperature decreases the PIC / POC ratio and increases phosphorus requirements in  
*Coccolithus pelagicus* (Haptophyta). *Biogeosciences* **11**, 3531-3545 (2014).
- 85 Barak-Gavish, N. *et al.* Bacterial virulence against an oceanic bloom-forming  
phytoplankter is mediated by algal DMSP. *Sci. Adv.* **4**, eaau5716 (2018).
- 86 Hummel, J. *et al.* Ultra performance liquid chromatography and high resolution mass  
spectrometry for the analysis of plant lipids. *Front. Plant Sci.* **2**, 54 (2011).
- 87 R Core Team. R: A language and environment for statistical computing R foundation  
for statistical computing. <https://r-project.org>. (2020).
- 88 Smith, C. A., Want, E. J., O'Maille, G., Abagyan, R. & Siuzdak, G. XCMS: Processing  
mass spectrometry data for metabolite profiling using nonlinear peak alignment,  
matching, and identification. *Anal. Chem.* **78**, 779-787 (2006).
- 89 Kuhl, C., Tautenhahn, R., Böttcher, C., Larson, T. R. & Neumann, S. CAMERA: An  
integrated strategy for compound spectra extraction and annotation of liquid  
chromatography/mass spectrometry data sets. *Anal. Chem.* **84**, 283-289 (2012).
- 90 Alboukadel, K. & Mundt, F. factoextra: Extract and visualize the results of multivariate  
data analyses. R package version 1.0.5. (2017).
- 91 Storey, J. D., Bass, A. J., Dabney, A. & Robinson, D. qvalue: Q-value estimation for  
false discovery rate control. R package version 2.14.1. (2019).
- 92 Feldmesser, E., Rosenwasser, S., Vardi, A. & Ben-Dor, S. Improving transcriptome  
construction in non-model organisms: Integrating manual and automated gene  
definition in *Emiliana huxleyi*. *BMC Genomics* **15**, 148 (2014).
- 93 Altschul, S. F. *et al.* Gapped BLAST and PSI-BLAST: A new generation of protein  
database search programs. *Nucleic Acids Res.* **25**, 3389-3402 (1997).
- 94 Finn, R. D. *et al.* Pfam: The protein families database. *Nucleic Acids Res.* **42**, D222–  
D230 (2014).
- 95 Lu, S. *et al.* CDD/SPARCLE: The conserved domain database in 2020. *Nucleic Acids*  
*Res.* **48**, D265-D268 (2020).
- 96 Larkin, M. A. *et al.* Clustal W and Clustal X version 2.0. *Bioinformatics* **23**, 2947-2948  
(2007).
- 97 Edgar, R. C. MUSCLE: Multiple sequence alignment with high accuracy and high  
throughput. *Nucleic Acids Res.* **32**, 1792-1797 (2004).
- 98 Katoh, K., Rozewicki, J. & Yamada, K. D. MAFFT online service: Multiple sequence  
alignment, interactive sequence choice and visualization. *Brief. Bioinform.* **20**, 1160-  
1166 (2019).

- 99 Felsenstein, J. PHYLIP (Phylogeny Inference Package) version 3.6. Distributed by the  
author. Department of Genome Sciences, University of Washington. (2004).
- 100 Guindon, S. *et al.* New algorithms and methods to estimate maximum-likelihood  
phylogenies: Assessing the performance of PhyML 3.0. *Syst. Biol.* **59**, 307-321 (2010).
- 101 Letunic, I. & Bork, P. Interactive Tree Of Life (iTOL) v5: An online tool for  
phylogenetic tree display and annotation. *Nucleic Acids Res.* **49**, W293-W296 (2021).
- 102 Sheyn, U. *et al.* Expression profiling of host and virus during a coccolithophore bloom  
provides insights into the role of viral infection in promoting carbon export. *ISME J.*  
**12**, 704-713 (2018).
- 103 Vincent, F. *et al.* AQUACOSM VIMS-Ehux – Core data. Dryad (2020).

## Supplementary Information

### Novel lipid biomarkers for algal resistance to viral infection in the ocean

Guy Schleyer<sup>1</sup>, Constanze Kuhlisch<sup>1</sup>, Carmit Ziv<sup>1,2</sup>, Shifra Ben-Dor<sup>3</sup>, Sergey Malitsky<sup>1,3</sup>,  
Daniella Schatz<sup>1</sup>, Assaf Vardi<sup>1\*</sup>

<sup>1</sup>Department of Plant and Environmental Sciences, Weizmann Institute of Science, Rehovot  
7610001, Israel

<sup>2</sup>Current: Department of Postharvest Science, Agricultural Research Organization, Volcani  
Center, Rishon LeZion 7505101, Israel

<sup>3</sup>Department of Life Sciences Core Facilities, Weizmann Institute of Science, Rehovot  
7610001, Israel

\*Corresponding author: [assaf.vardi@weizmann.ac.il](mailto:assaf.vardi@weizmann.ac.il)

This PDF file includes:

Figures S1 to S34

Tables S1 to S11

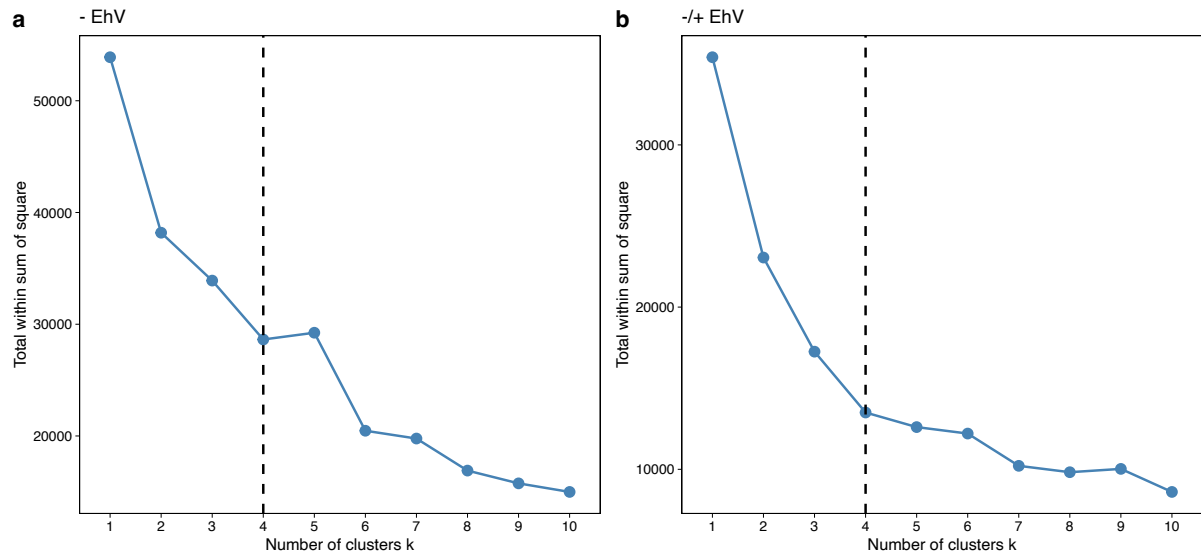

**Figure S8: Elbow method for determining the best number of clusters.** The method was applied on untargeted LC-MS-based lipidomics data (using 12,190 mass features) derived from cultures of two resistant and two susceptible *E. huxleyi* strains (a) without addition of EhV and (b) with and without addition of EhV. In both cases,  $k = 4$  was chosen as the best number of clusters.





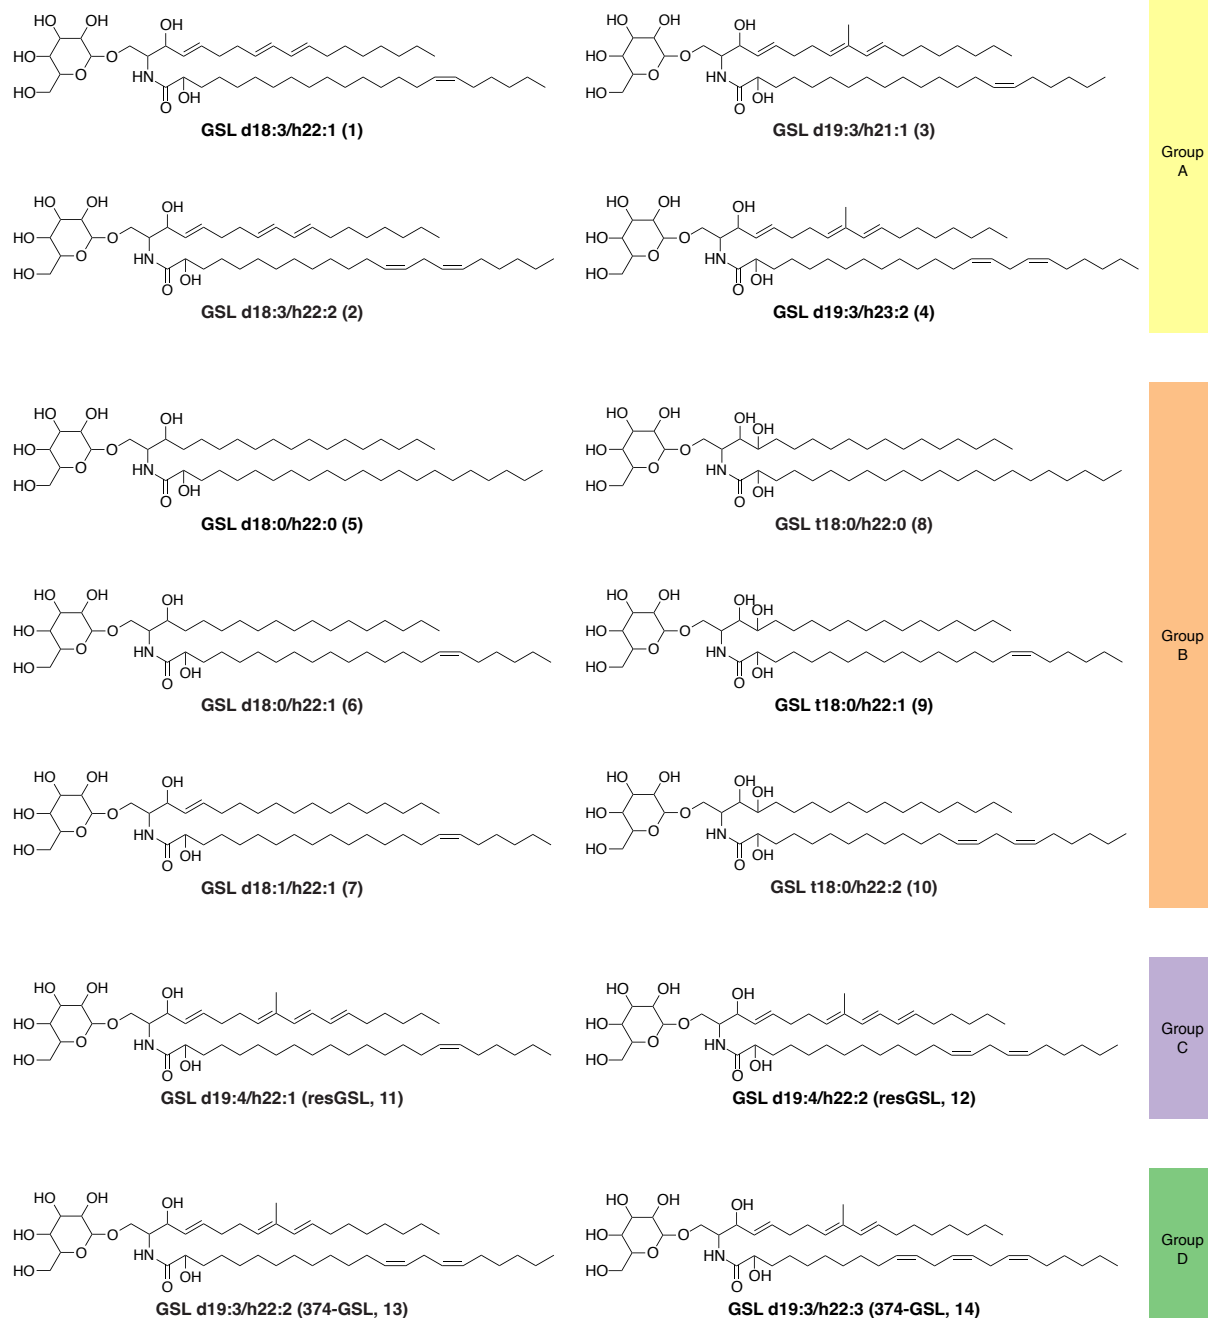

**Figure S10: Structures of GSL species that differ between resistant and susceptible *E. huxleyi* strains and were identified in this study.** Putative structures of previously undescribed GSL species within the *E. huxleyi*-EhV model system, which are differential between resistant and susceptible *E. huxleyi* strains (Table 1). The structures, including LCB and FA composition, were determined based on LC-MS/MS analysis (Fig. S4-S17). LCB composition, which varies in the amount of double bonds, hydroxyl groups and the alkyl chain branching, seems to be the main factor that differentiates between the various groups of GSLs, and, consequently, between the cell types. The positions of double bonds and functional groups were assigned based on the most common structures in the Lipid Maps Structure Database (LMSD) <sup>1</sup>.

### GSL d18:3/h22:1 (1)

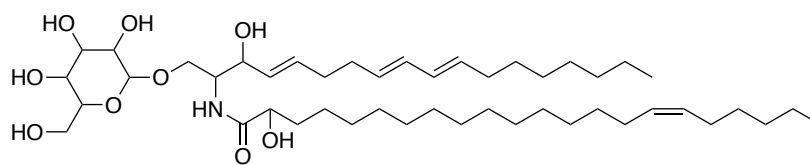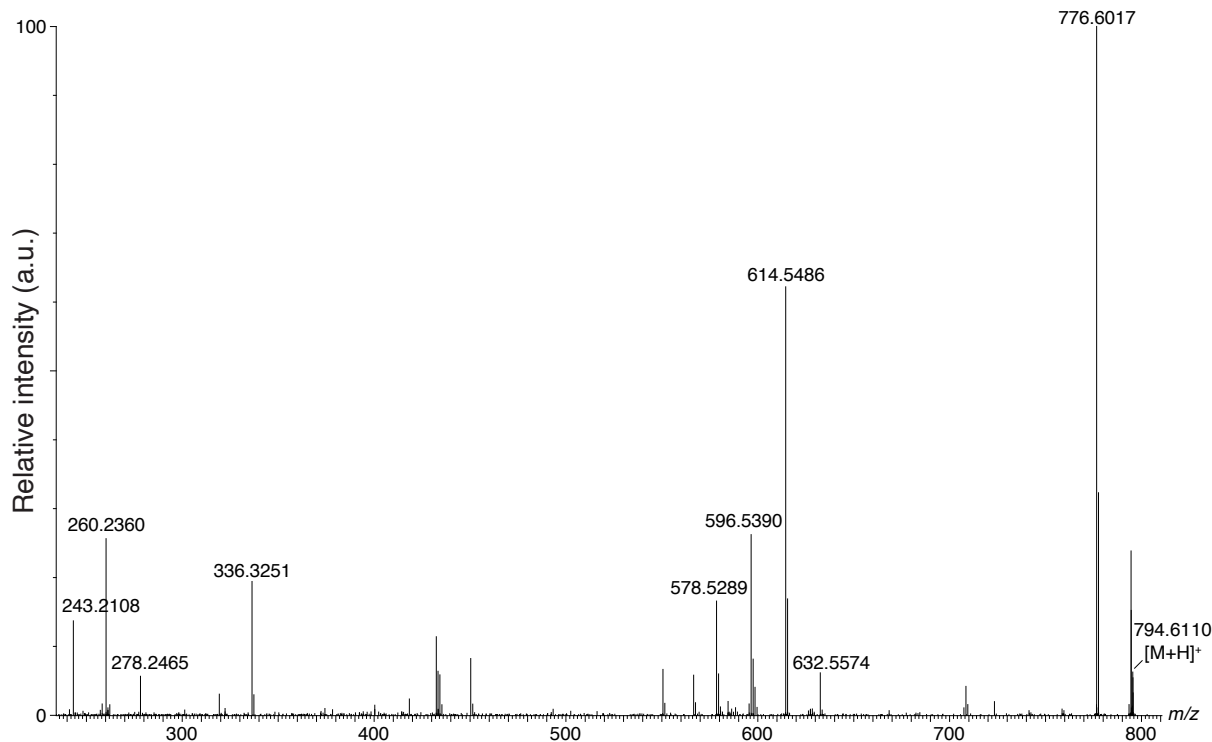

| Observed $m/z$ | Predicted ion                        | Chemical formula     | Theoretical $m/z$ | Mass error (ppm) |
|----------------|--------------------------------------|----------------------|-------------------|------------------|
| 794.6110       | $[M+H]^+$                            | $C_{46}H_{84}NO_9^+$ | 794.6146          | -4.5             |
| 776.6017       | $[M+H-H_2O]^+$                       | $C_{46}H_{82}NO_8^+$ | 776.6040          | -3.0             |
| 632.5574       | $[M+H-(Hexose-H_2O)]^+$              | $C_{40}H_{74}NO_4^+$ | 632.5618          | -6.9             |
| 614.5486       | $[M+H-Hexose]^+$                     | $C_{40}H_{72}NO_3^+$ | 614.5512          | -4.3             |
| 596.5390       | $[M+H-Hexose-H_2O]^+$                | $C_{40}H_{70}NO_2^+$ | 596.5407          | -2.8             |
| 578.5289       | $[M+H-Hexose-2 \cdot H_2O]^+$        | $C_{40}H_{68}NO^+$   | 578.5301          | -2.1             |
| 278.2465       | $[LCB\ d18:3+H-H_2O]^+$              | $C_{18}H_{32}NO^+$   | 278.2484          | -6.8             |
| 260.2360       | $[LCB\ d18:3+H-2 \cdot H_2O]^+$      | $C_{18}H_{30}N^+$    | 260.2378          | -7.0             |
| 243.2108       | $[LCB\ d18:3+H-NH_3-2 \cdot H_2O]^+$ | $C_{18}H_{27}^+$     | 243.2113          | -2.0             |
| 336.3251       | $[Amino\ FA\ h22:1+H-H_2O]^+$        | $C_{22}H_{42}NO^+$   | 336.3266          | -4.6             |

**Figure S11: LC-MS/MS analysis of GSL d18:3/h22:1 (1).** A putative structure is presented, supported by a list of fragments detected in MS/MS mode (Metabolomics Standards Initiative level 2 annotation<sup>2</sup>). Fragments were detected in positive ionization MS/MS mode using  $[M+H]^+ = 794.6107$  as the precursor ion (Table 1). The positions of the double bonds and functional groups were assigned based on the most common structures in the Lipid Maps Structure Database (LMSD)<sup>1</sup>.

### GSL d18:3/h22:2 (2)

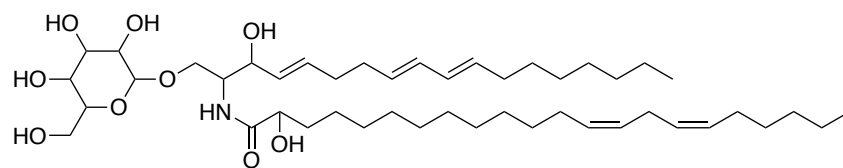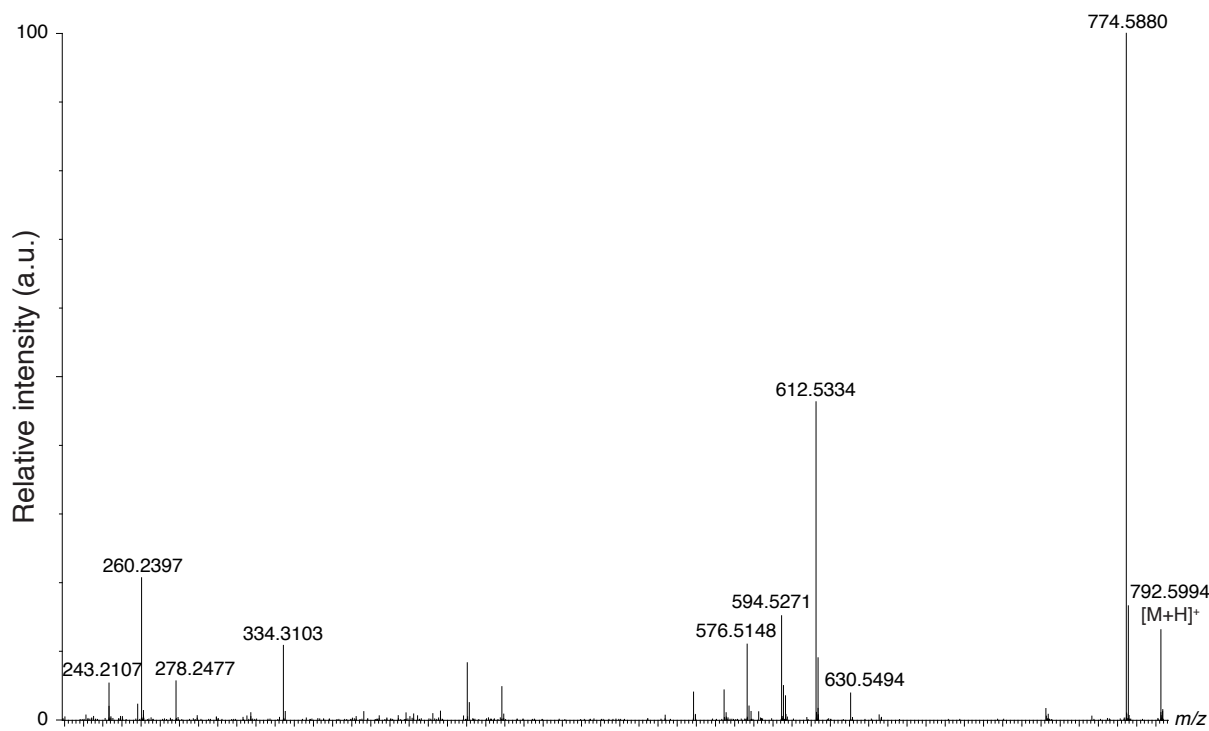

| Observed $m/z$ | Predicted ion                        | Chemical formula     | Theoretical $m/z$ | Mass error (ppm) |
|----------------|--------------------------------------|----------------------|-------------------|------------------|
| 792.5994       | $[M+H]^+$                            | $C_{46}H_{82}NO_9^+$ | 792.5990          | 0.5              |
| 774.5880       | $[M+H-H_2O]^+$                       | $C_{46}H_{80}NO_8^+$ | 774.5884          | -0.5             |
| 630.5494       | $[M+H-(Hexose-H_2O)]^+$              | $C_{40}H_{72}NO_4^+$ | 630.5461          | 5.2              |
| 612.5334       | $[M+H-Hexose]^+$                     | $C_{40}H_{70}NO_3^+$ | 612.5356          | -3.6             |
| 594.5271       | $[M+H-Hexose-H_2O]^+$                | $C_{40}H_{68}NO_2^+$ | 594.5250          | 3.5              |
| 576.5148       | $[M+H-Hexose-2 \cdot H_2O]^+$        | $C_{40}H_{66}NO^+$   | 576.5144          | 0.7              |
| 278.2477       | $[LCB\ d18:3+H-H_2O]^+$              | $C_{18}H_{32}NO^+$   | 278.2484          | -2.5             |
| 260.2397       | $[LCB\ d18:3+H-2 \cdot H_2O]^+$      | $C_{18}H_{30}N^+$    | 260.2378          | 7.3              |
| 243.2107       | $[LCB\ d18:3+H-NH_3-2 \cdot H_2O]^+$ | $C_{18}H_{27}^+$     | 243.2113          | -2.5             |
| 334.3103       | $[Amino\ FA\ h22:2+H-H_2O]^+$        | $C_{22}H_{40}NO^+$   | 334.3110          | -2.1             |

**Figure S12: LC-MS/MS analysis of GSL d18:3/h22:2 (2).** A putative structure is presented, supported by a list of fragments detected in MS/MS mode (Metabolomics Standards Initiative level 2<sup>2</sup>). Fragments were detected in positive ionization MS/MS mode using  $[M+H]^+ = 792.5980$  as the precursor ion (Table 1). The positions of the double bonds and functional groups were assigned based on the most common structures in the Lipid Maps Structure Database (LMSD)<sup>1</sup>.

GSL d19:3/h21:1 (3)

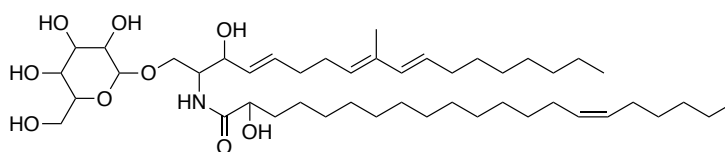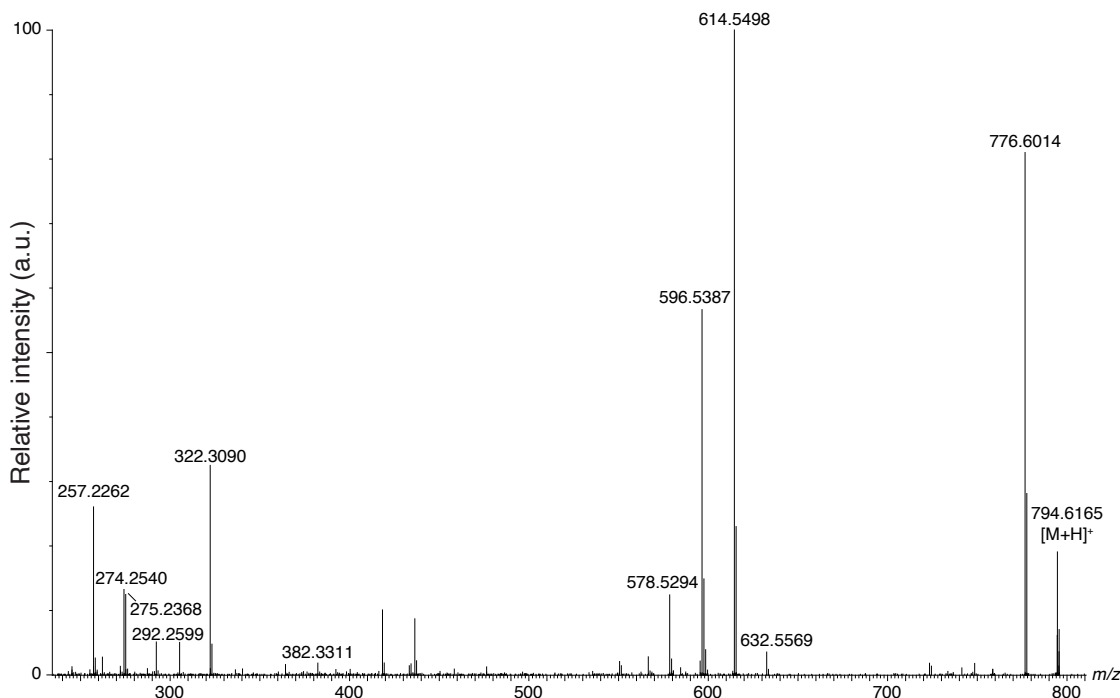

| Observed <i>m/z</i> | Predicted ion                                                   | Chemical formula                                             | Theoretical <i>m/z</i> | Mass error (ppm) |
|---------------------|-----------------------------------------------------------------|--------------------------------------------------------------|------------------------|------------------|
| 794.6165            | [M+H] <sup>+</sup>                                              | C <sub>46</sub> H <sub>84</sub> NO <sub>9</sub> <sup>+</sup> | 794.6146               | 2.4              |
| 776.6014            | [M+H-H <sub>2</sub> O] <sup>+</sup>                             | C <sub>46</sub> H <sub>82</sub> NO <sub>8</sub> <sup>+</sup> | 776.6040               | -3.3             |
| 632.5569            | [M+H-(Hexose-H <sub>2</sub> O)] <sup>+</sup>                    | C <sub>40</sub> H <sub>74</sub> NO <sub>4</sub> <sup>+</sup> | 632.5618               | -7.7             |
| 614.5498            | [M+H-Hexose] <sup>+</sup>                                       | C <sub>40</sub> H <sub>72</sub> NO <sub>3</sub> <sup>+</sup> | 614.5512               | -2.3             |
| 596.5387            | [M+H-Hexose-H <sub>2</sub> O] <sup>+</sup>                      | C <sub>40</sub> H <sub>70</sub> NO <sub>2</sub> <sup>+</sup> | 596.5407               | -3.4             |
| 578.5294            | [M+H-Hexose-2·H <sub>2</sub> O] <sup>+</sup>                    | C <sub>40</sub> H <sub>68</sub> NO <sup>+</sup>              | 578.5301               | -1.2             |
| 292.2599            | [LCB d19:3+H-H <sub>2</sub> O] <sup>+</sup>                     | C <sub>19</sub> H <sub>34</sub> NO <sup>+</sup>              | 292.2640               | -14.2            |
| 274.2540            | [LCB d19:3+H-2·H <sub>2</sub> O] <sup>+</sup>                   | C <sub>19</sub> H <sub>32</sub> N <sup>+</sup>               | 274.2535               | 1.9              |
| 275.2368            | [LCB d19:3+H-NH <sub>3</sub> -H <sub>2</sub> O] <sup>+</sup>    | C <sub>19</sub> H <sub>31</sub> O <sup>+</sup>               | 275.2375               | -2.5             |
| 257.2262            | [LCB d19:3+H-NH <sub>3</sub> -2·H <sub>2</sub> O] <sup>+</sup>  | C <sub>19</sub> H <sub>29</sub> <sup>+</sup>                 | 257.2269               | -2.8             |
| 382.3311            | [Amino FA h21:1+H+C <sub>2</sub> H <sub>3</sub> O] <sup>+</sup> | C <sub>23</sub> H <sub>44</sub> NO <sub>3</sub> <sup>+</sup> | 382.3321               | -2.7             |
| 322.3090            | [Amino FA h21:1+H-H <sub>2</sub> O] <sup>+</sup>                | C <sub>21</sub> H <sub>40</sub> NO <sup>+</sup>              | 322.3110               | -6.2             |

**Figure S13: LC-MS/MS analysis of GSL d19:3/h21:1 (3).** A putative structure is presented, supported by a list of fragments detected in MS/MS mode (Metabolomics Standards Initiative level 2 annotation<sup>2</sup>). Fragments were detected in positive ionization MS/MS mode using [M+H]<sup>+</sup> = 794.6107 as the precursor ion (Table 1). The positions of the double bonds and functional groups were assigned based on the most common structures in the Lipid Maps Structure Database (LMSD)<sup>1</sup>.



GSL d19:3/h23:2 (4)

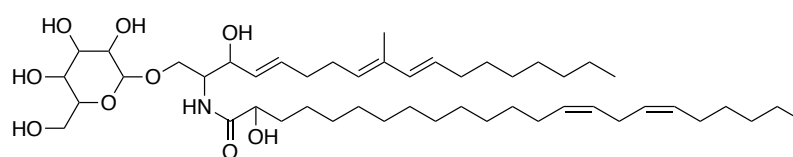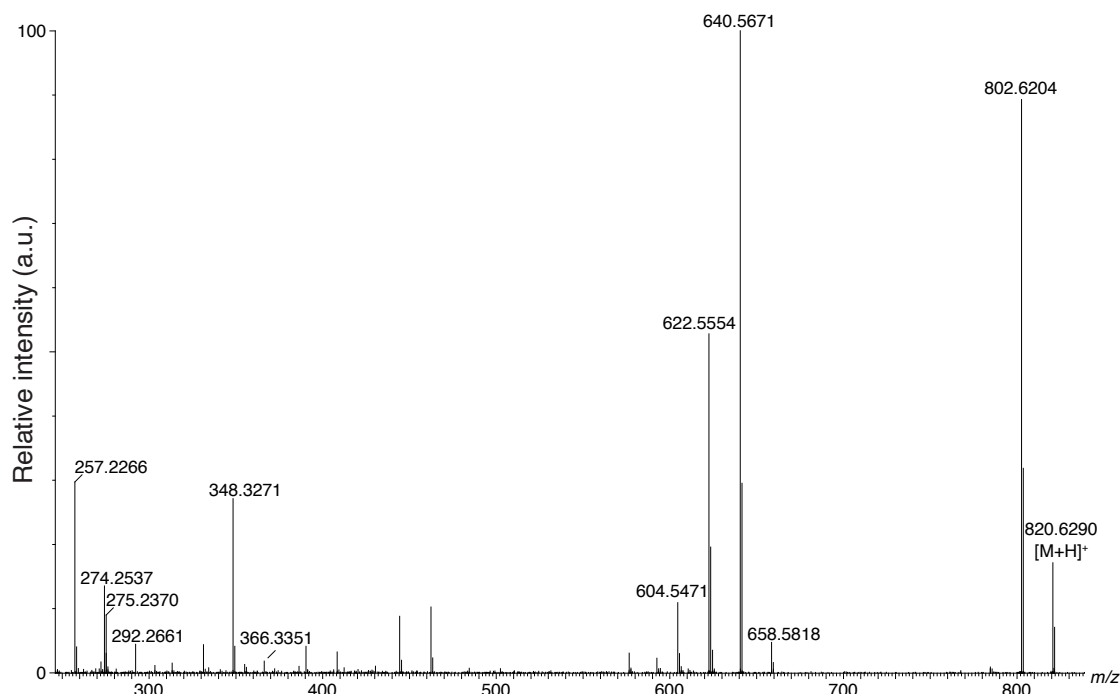

| Observed <i>m/z</i> | Predicted ion                                                  | Chemical formula                                             | Theoretical <i>m/z</i> | Mass error (ppm) |
|---------------------|----------------------------------------------------------------|--------------------------------------------------------------|------------------------|------------------|
| 820.6290            | [M+H] <sup>+</sup>                                             | C <sub>48</sub> H <sub>86</sub> NO <sub>9</sub> <sup>+</sup> | 820.6303               | -1.6             |
| 820.6204            | [M+H-H <sub>2</sub> O] <sup>+</sup>                            | C <sub>48</sub> H <sub>84</sub> NO <sub>8</sub> <sup>+</sup> | 802.6197               | 0.9              |
| 658.5818            | [M+H-(Hexose-H <sub>2</sub> O)] <sup>+</sup>                   | C <sub>42</sub> H <sub>76</sub> NO <sub>4</sub> <sup>+</sup> | 658.5774               | 6.6              |
| 640.5671            | [M+H-Hexose] <sup>+</sup>                                      | C <sub>42</sub> H <sub>74</sub> NO <sub>3</sub> <sup>+</sup> | 640.5669               | 0.4              |
| 622.5554            | [M+H-Hexose-H <sub>2</sub> O] <sup>+</sup>                     | C <sub>42</sub> H <sub>72</sub> NO <sub>2</sub> <sup>+</sup> | 622.5563               | -1.5             |
| 604.5471            | [M+H-Hexose-2·H <sub>2</sub> O] <sup>+</sup>                   | C <sub>42</sub> H <sub>70</sub> NO <sup>+</sup>              | 604.5457               | 2.2              |
| 292.2661            | [LCB d19:3+H-H <sub>2</sub> O] <sup>+</sup>                    | C <sub>19</sub> H <sub>34</sub> NO <sup>+</sup>              | 292.2640               | 7.0              |
| 274.2537            | [LCB d19:3+H-2·H <sub>2</sub> O] <sup>+</sup>                  | C <sub>19</sub> H <sub>32</sub> N <sup>+</sup>               | 274.2535               | 0.8              |
| 275.2370            | [LCB d19:3+H-NH <sub>3</sub> -H <sub>2</sub> O] <sup>+</sup>   | C <sub>19</sub> H <sub>31</sub> O <sup>+</sup>               | 275.2375               | -1.8             |
| 257.2266            | [LCB d19:3+H-NH <sub>3</sub> -2·H <sub>2</sub> O] <sup>+</sup> | C <sub>19</sub> H <sub>29</sub> <sup>+</sup>                 | 257.2269               | -1.3             |
| 366.3351            | [Amino FA h23:2+H] <sup>+</sup>                                | C <sub>23</sub> H <sub>44</sub> NO <sub>2</sub> <sup>+</sup> | 366.3372               | -5.7             |
| 348.3271            | [Amino FA h23:2+H-H <sub>2</sub> O] <sup>+</sup>               | C <sub>23</sub> H <sub>42</sub> NO <sup>+</sup>              | 348.32664              | 1.3              |

**Figure S14: LC-MS/MS analysis of GSL d19:3/h23:2 (4).** A putative structure is presented, supported by a list of fragments detected in MS/MS mode (Metabolomics Standards Initiative level 2 annotation<sup>2</sup>). Fragments were detected in positive ionization MS/MS mode using [M+H]<sup>+</sup> = 820.6278 as the precursor ion (Table 1). The positions of the double bonds and functional groups were assigned based on the most common structures in the Lipid Maps Structure Database (LMSD)<sup>1</sup>.

### GSL d18:0/h22:0 (5)

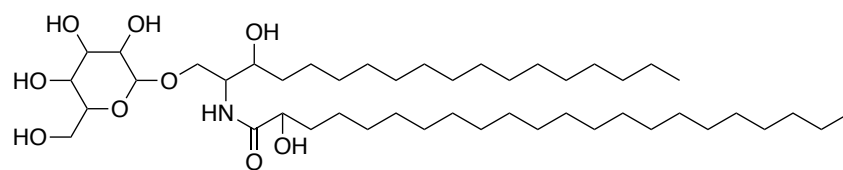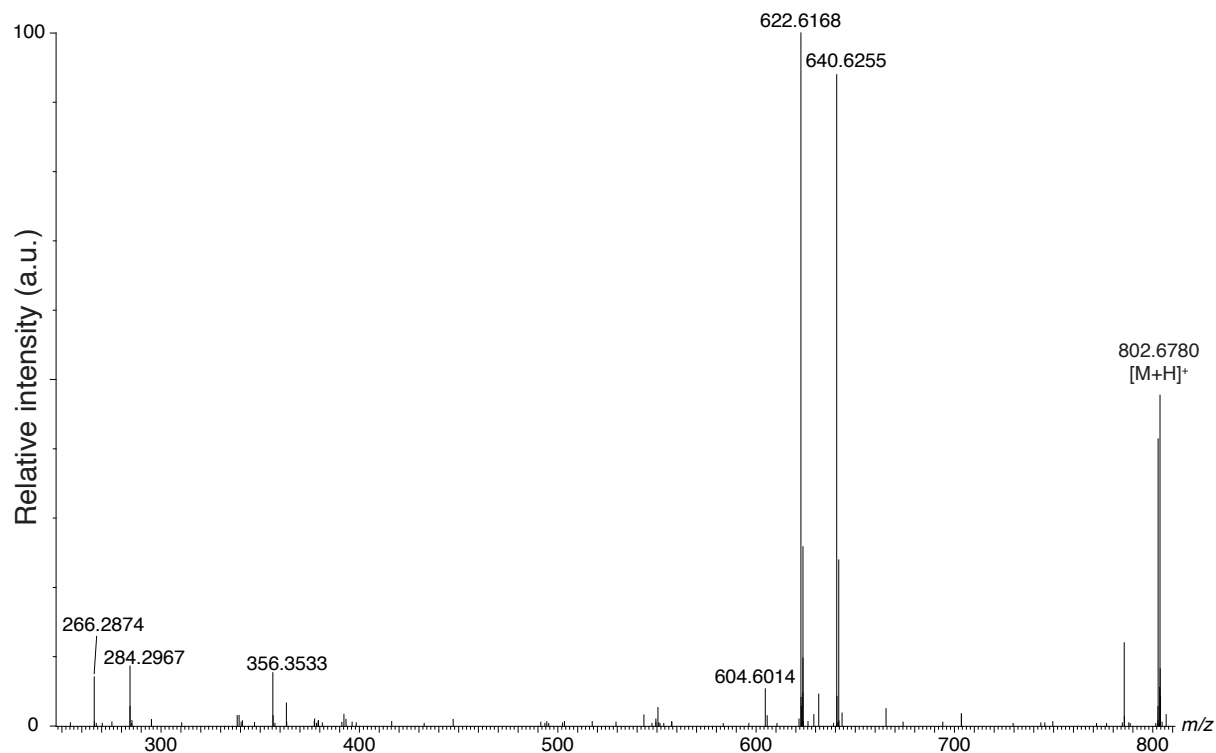

| Observed $m/z$ | Predicted ion                  | Chemical formula     | Theoretical $m/z$ | Mass error (ppm) |
|----------------|--------------------------------|----------------------|-------------------|------------------|
| 802.6780       | $[M+H]^+$                      | $C_{46}H_{92}NO_9^+$ | 802.6772          | 1.0              |
| 640.6255       | $[M+H-(Hexose-H_2O)]^+$        | $C_{40}H_{82}NO_4^+$ | 640.6244          | 1.7              |
| 622.6168       | $[M+H-Hexose]^+$               | $C_{40}H_{80}NO_3^+$ | 622.6138          | 4.8              |
| 604.6014       | $[M+H-Hexose-H_2O]^+$          | $C_{40}H_{78}NO_2^+$ | 604.6033          | -3.1             |
| 284.2967       | $[LCB\ d18:0+H-H_2O]^+$        | $C_{18}H_{38}NO^+$   | 284.2953          | 4.9              |
| 266.2874       | $[LCB\ d18:0+H-2\cdot H_2O]^+$ | $C_{18}H_{36}N^+$    | 266.2848          | 9.8              |
| 356.3533       | $[Amino\ FA\ h22:0+H]^+$       | $C_{22}H_{46}NO_2^+$ | 356.3529          | 1.1              |

**Figure S15: LC-MS/MS analysis of GSL d18:0/h22:0 (5).** A putative structure is presented, supported by a list of fragments detected in MS/MS mode (Metabolomics Standards Initiative level 2 annotation<sup>2</sup>). Fragments were detected in positive ionization MS/MS mode using  $[M+H]^+ = 802.6722$  as the precursor ion (Table 1). The positions of the functional groups were assigned based on the most common structures in the Lipid Maps Structure Database (LMSD)<sup>1</sup>.

### GSL t18:0/h22:1 (9)

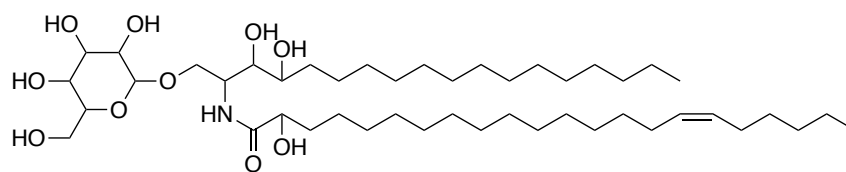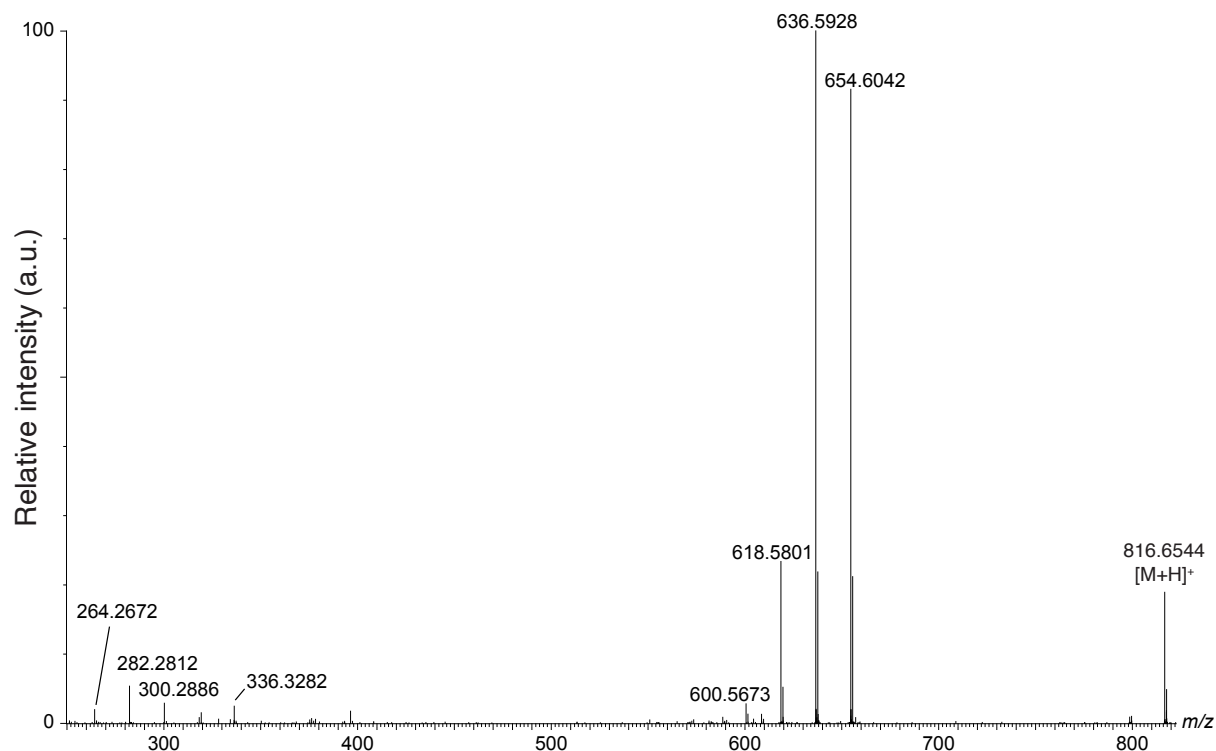

| Observed $m/z$ | Predicted ion                   | Chemical formula        | Theoretical $m/z$ | Mass error (ppm) |
|----------------|---------------------------------|-------------------------|-------------------|------------------|
| 816.6544       | $[M+H]^+$                       | $C_{46}H_{90}NO_{10}^+$ | 816.6565          | -2.6             |
| 654.6042       | $[M+H-(Hexose-H_2O)]^+$         | $C_{40}H_{80}NO_5^+$    | 654.6037          | 0.8              |
| 636.5928       | $[M+H-Hexose]^+$                | $C_{40}H_{78}NO_4^+$    | 636.5931          | -0.4             |
| 618.5801       | $[M+H-Hexose-H_2O]^+$           | $C_{40}H_{76}NO_3^+$    | 618.5825          | -3.9             |
| 600.5673       | $[M+H-Hexose-2 \cdot H_2O]^+$   | $C_{40}H_{74}NO_2^+$    | 600.5720          | -7.8             |
| 582.5620       | $[M+H-Hexose-3 \cdot H_2O]^+$   | $C_{40}H_{72}NO^+$      | 582.5614          | 1.0              |
| 300.2886       | $[LCB\ t18:0+H-H_2O]^+$         | $C_{18}H_{38}NO_2^+$    | 300.2903          | -5.5             |
| 282.2812       | $[LCB\ t18:0+H-2 \cdot H_2O]^+$ | $C_{18}H_{36}NO^+$      | 282.2797          | 5.4              |
| 264.2672       | $[LCB\ t18:0+H-3 \cdot H_2O]^+$ | $C_{18}H_{34}N^+$       | 264.2691          | -7.3             |
| 336.3282       | $[Amino\ FA\ h22:1+H-H_2O]^+$   | $C_{22}H_{42}NO^+$      | 336.3266          | 4.8              |

**Figure S16: LC-MS/MS analysis of GSL t18:0/h22:1 (9).** A putative structure is presented, supported by a list of fragments detected in MS/MS mode (Metabolomics Standards Initiative level 2 annotation<sup>2</sup>). Fragments were detected in positive ionization MS/MS mode using  $[M+H]^+ = 816.6531$  as the precursor ion (Table 1). The positions of the double bonds and functional groups were assigned based on the most common structures in the Lipid Maps Structure Database (LMSD)<sup>1</sup>.

GSL d19:4/h22:2 (resGSL, 12)

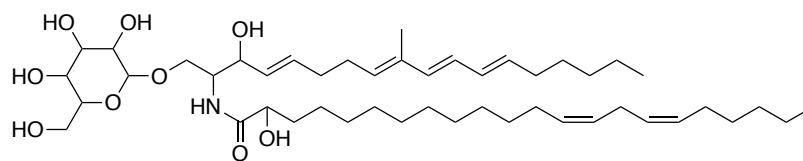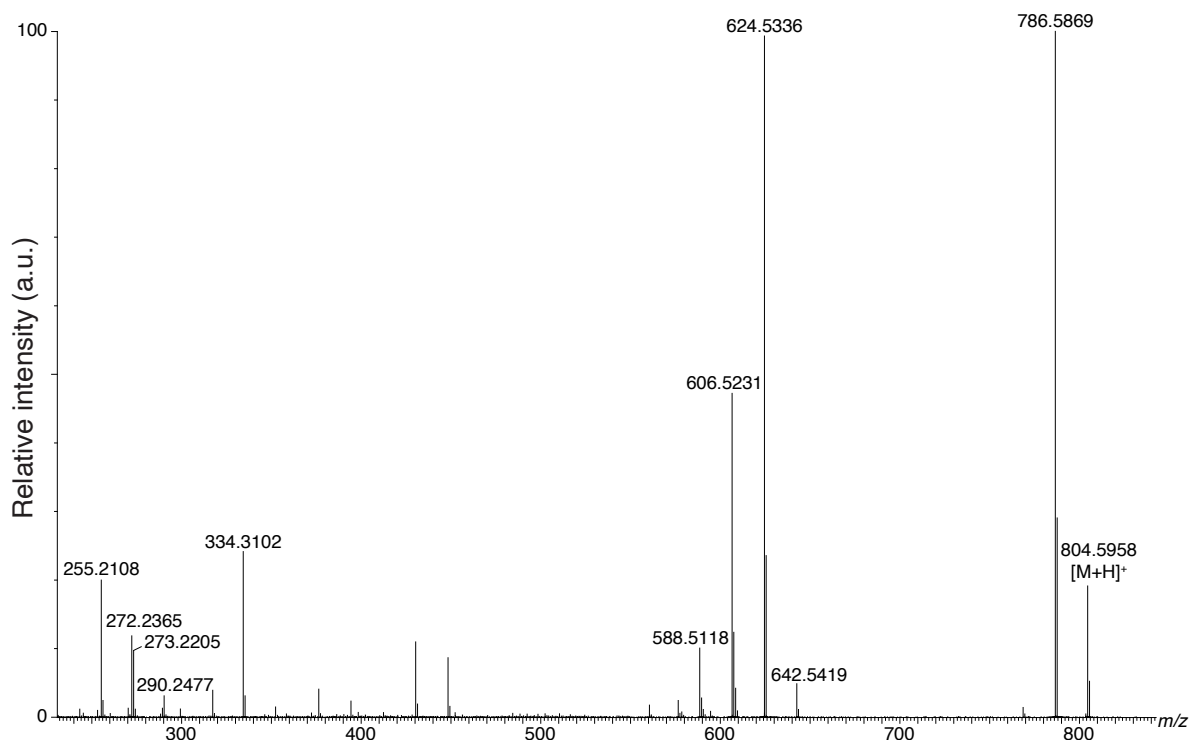

| Observed $m/z$ | Predicted ion                              | Chemical formula     | Theoretical $m/z$ | Mass error (ppm) |
|----------------|--------------------------------------------|----------------------|-------------------|------------------|
| 804.5958       | $[M+H]^+$                                  | $C_{47}H_{82}NO_9^+$ | 804.5990          | -4.0             |
| 786.5869       | $[M+H-H_2O]^+$                             | $C_{47}H_{80}NO_8^+$ | 786.5884          | -1.9             |
| 642.5419       | $[M+H-(\text{Hexose}-H_2O)]^+$             | $C_{41}H_{72}NO_4^+$ | 642.5461          | -6.6             |
| 624.5336       | $[M+H-\text{Hexose}]^+$                    | $C_{41}H_{70}NO_3^+$ | 624.5356          | -3.2             |
| 606.5231       | $[M+H-\text{Hexose}-H_2O]^+$               | $C_{41}H_{68}NO_2^+$ | 606.5250          | -3.1             |
| 588.5118       | $[M+H-\text{Hexose}-2 \cdot H_2O]^+$       | $C_{41}H_{66}NO^+$   | 588.5144          | -4.5             |
| 290.2477       | $[\text{LCB d19:4}+H-H_2O]^+$              | $C_{19}H_{32}NO^+$   | 290.2484          | -2.4             |
| 272.2365       | $[\text{LCB d19:4}+H-2 \cdot H_2O]^+$      | $C_{19}H_{30}N^+$    | 272.2378          | -4.9             |
| 273.2205       | $[\text{LCB d19:4}+H-NH_3-H_2O]^+$         | $C_{19}H_{29}O^+$    | 273.2218          | -4.9             |
| 255.2108       | $[\text{LCB d19:4}+H-NH_3-2 \cdot H_2O]^+$ | $C_{19}H_{27}^+$     | 255.2113          | -1.9             |
| 334.3102       | $[\text{Amino FA h22:2}+H-H_2O]^+$         | $C_{22}H_{40}NO^+$   | 334.3110          | -2.4             |

**Figure S17: LC-MS/MS analysis of GSL d19:4/h22:2 (resGSL, 12).** A putative structure is presented, supported by a list of fragments detected in MS/MS mode (Metabolomics Standards Initiative level 2 annotation<sup>2</sup>). Fragments were detected in positive ionization MS/MS mode using  $[M+H]^+ = 804.5975$  as the precursor ion (Table 1). The positions of the double bonds and functional groups were assigned based on the most common structures in the Lipid Maps Structure Database (LMSD)<sup>1</sup>.

GSL d19:3/h22:2 (374-GSL, 13)

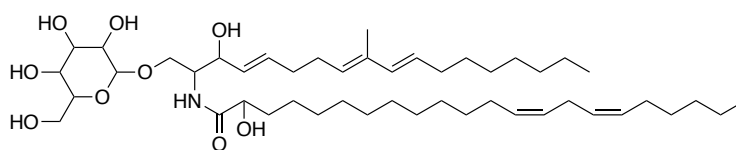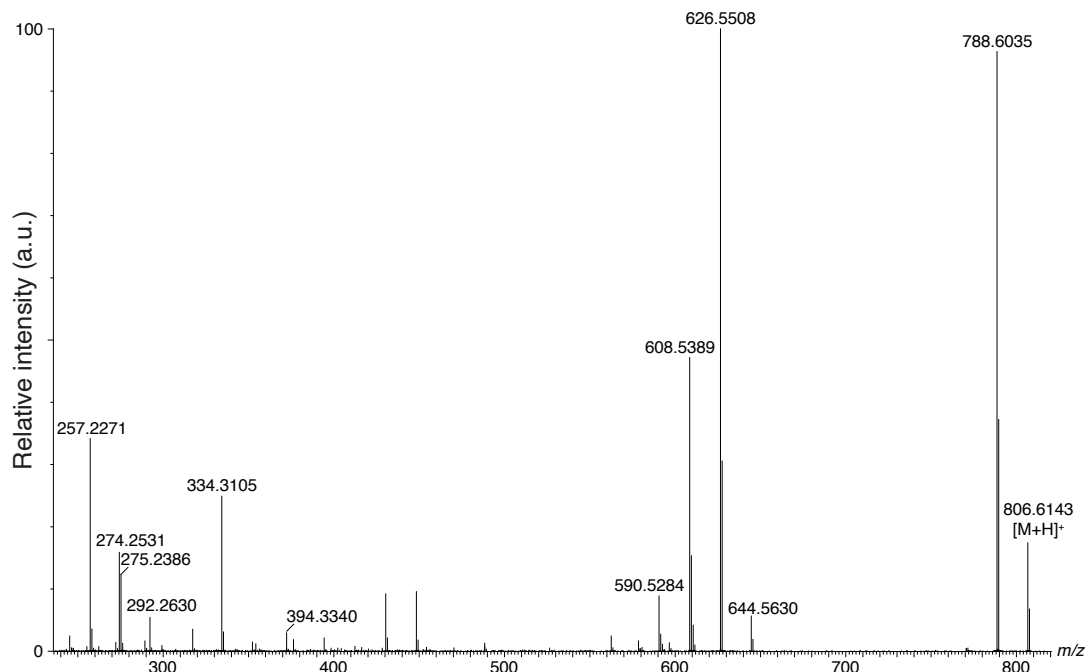

| Observed <i>m/z</i> | Predicted ion                                                   | Chemical formula                                             | Theoretical <i>m/z</i> | Mass error (ppm) |
|---------------------|-----------------------------------------------------------------|--------------------------------------------------------------|------------------------|------------------|
| 806.6143            | [M+H] <sup>+</sup>                                              | C <sub>47</sub> H <sub>84</sub> NO <sub>9</sub> <sup>+</sup> | 806.6146               | -0.4             |
| 788.6035            | [M+H-H <sub>2</sub> O] <sup>+</sup>                             | C <sub>47</sub> H <sub>82</sub> NO <sub>8</sub> <sup>+</sup> | 788.6040               | -0.6             |
| 644.5630            | [M+H-(Hexose-H <sub>2</sub> O)] <sup>+</sup>                    | C <sub>41</sub> H <sub>74</sub> NO <sub>4</sub> <sup>+</sup> | 644.5618               | 1.9              |
| 626.5508            | [M+H-(Hexosyl)] <sup>+</sup>                                    | C <sub>41</sub> H <sub>72</sub> NO <sub>3</sub> <sup>+</sup> | 626.5512               | -0.7             |
| 608.5389            | [M+H-Hexosyl-H <sub>2</sub> O] <sup>+</sup>                     | C <sub>41</sub> H <sub>70</sub> NO <sub>2</sub> <sup>+</sup> | 608.5407               | -2.9             |
| 590.5284            | [M+H-Hexosyl-2·H <sub>2</sub> O] <sup>+</sup>                   | C <sub>41</sub> H <sub>68</sub> NO <sub>2</sub> <sup>+</sup> | 590.5301               | -2.9             |
| 292.2630            | [LCB d19:3+H-H <sub>2</sub> O] <sup>+</sup>                     | C <sub>19</sub> H <sub>34</sub> NO <sup>+</sup>              | 292.2640               | -3.6             |
| 274.2531            | [LCB d19:3+H-2·H <sub>2</sub> O] <sup>+</sup>                   | C <sub>19</sub> H <sub>32</sub> N <sup>+</sup>               | 274.2535               | -1.4             |
| 275.2386            | [LCB d19:3+H-NH <sub>3</sub> -H <sub>2</sub> O] <sup>+</sup>    | C <sub>19</sub> H <sub>31</sub> O <sup>+</sup>               | 275.2375               | 4.0              |
| 257.2271            | [LCB d19:3+H-NH <sub>3</sub> -2·H <sub>2</sub> O] <sup>+</sup>  | C <sub>19</sub> H <sub>29</sub> <sup>+</sup>                 | 257.2269               | 0.7              |
| 394.3340            | [Amino FA h22:2+H+C <sub>2</sub> H <sub>3</sub> O] <sup>+</sup> | C <sub>24</sub> H <sub>44</sub> NO <sub>3</sub> <sup>+</sup> | 394.3321               | 4.8              |
| 334.3105            | [Amino FA h22:2+H-H <sub>2</sub> O] <sup>+</sup>                | C <sub>22</sub> H <sub>40</sub> NO <sup>+</sup>              | 334.3110               | -1.5             |

**Figure S18: LC-MS/MS analysis of GSL d19:3/h22:2 (374-GSL, 13).** A putative structure is presented, supported by a list of fragments detected in MS/MS mode (Metabolomics Standards Initiative level 2 annotation<sup>2</sup>). Fragments were detected in positive ionization MS/MS mode using [M+H]<sup>+</sup> = 806.6143 as the precursor ion (Table 1). The positions of the double bonds and functional groups were assigned based on the most common structures in the Lipid Maps Structure Database (LMSD)<sup>1</sup>.



GSL d19:3/h22:3 (374-GSL, 14)

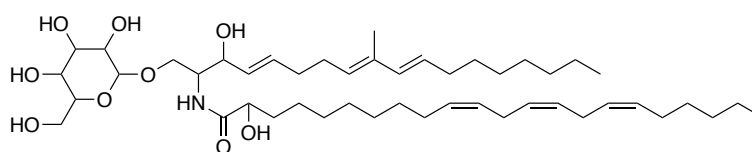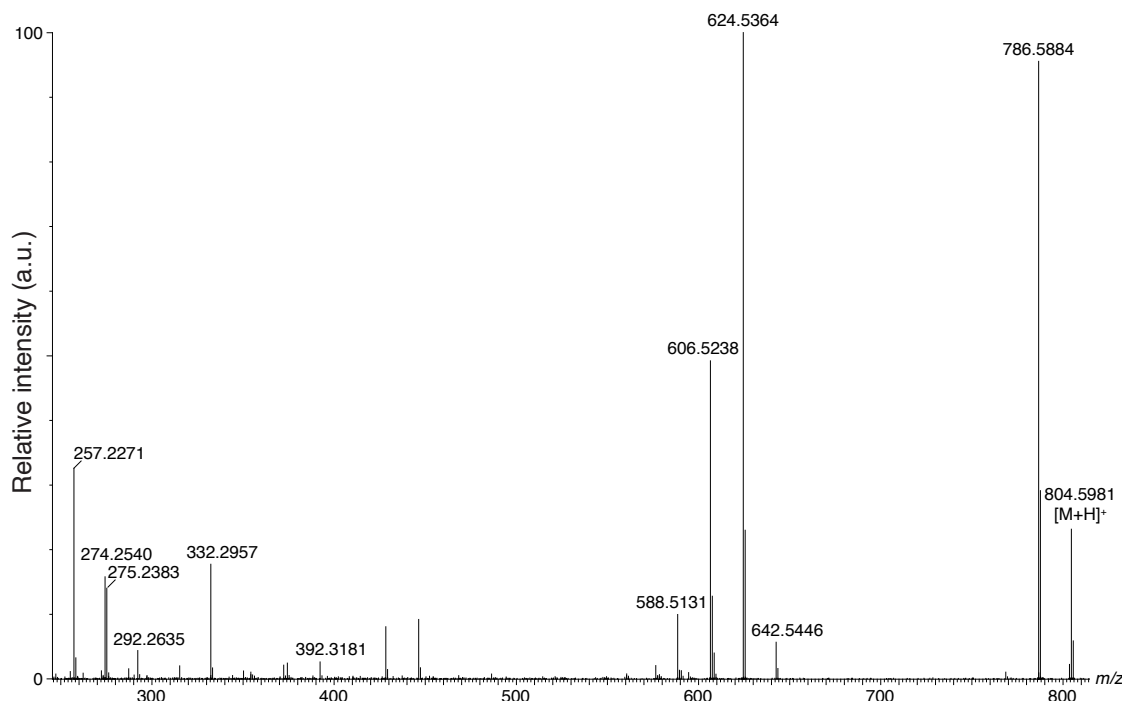

| Observed <i>m/z</i> | Predicted ion                                                   | Chemical formula                                             | Theoretical <i>m/z</i> | Mass error (ppm) |
|---------------------|-----------------------------------------------------------------|--------------------------------------------------------------|------------------------|------------------|
| 804.5981            | [M+H] <sup>+</sup>                                              | C <sub>47</sub> H <sub>82</sub> NO <sub>9</sub> <sup>+</sup> | 804.5990               | -1.1             |
| 786.5884            | [M+H-H <sub>2</sub> O] <sup>+</sup>                             | C <sub>47</sub> H <sub>80</sub> NO <sub>8</sub> <sup>+</sup> | 786.5884               | 0.0              |
| 642.5446            | [M+H-(Hexose-H <sub>2</sub> O)] <sup>+</sup>                    | C <sub>41</sub> H <sub>72</sub> NO <sub>4</sub> <sup>+</sup> | 642.5461               | -2.4             |
| 624.5364            | [M+H-Hexose] <sup>+</sup>                                       | C <sub>41</sub> H <sub>70</sub> NO <sub>3</sub> <sup>+</sup> | 624.5356               | 1.3              |
| 606.5238            | [M+H-Hexose-H <sub>2</sub> O] <sup>+</sup>                      | C <sub>41</sub> H <sub>68</sub> NO <sub>2</sub> <sup>+</sup> | 606.5250               | -2.0             |
| 588.5131            | [M+H-Hexose-2·H <sub>2</sub> O] <sup>+</sup>                    | C <sub>41</sub> H <sub>66</sub> NO <sup>+</sup>              | 588.5144               | -2.3             |
| 292.2635            | [LCB d19:3+H-H <sub>2</sub> O] <sup>+</sup>                     | C <sub>19</sub> H <sub>34</sub> NO <sup>+</sup>              | 292.2640               | -1.8             |
| 274.2540            | [LCB d19:3+H-2·H <sub>2</sub> O] <sup>+</sup>                   | C <sub>19</sub> H <sub>32</sub> N <sup>+</sup>               | 274.2535               | 1.9              |
| 275.2383            | [LCB d19:3+H-NH <sub>3</sub> -H <sub>2</sub> O] <sup>+</sup>    | C <sub>19</sub> H <sub>31</sub> O <sup>+</sup>               | 275.2375               | 2.9              |
| 257.2271            | [LCB d19:3+H-NH <sub>3</sub> -2·H <sub>2</sub> O] <sup>+</sup>  | C <sub>19</sub> H <sub>29</sub> <sup>+</sup>                 | 257.2269               | 0.7              |
| 392.3181            | [Amino FA h22:3+H+C <sub>2</sub> H <sub>3</sub> O] <sup>+</sup> | C <sub>24</sub> H <sub>42</sub> NO <sub>3</sub> <sup>+</sup> | 392.3165               | 4.2              |
| 332.2957            | [Amino FA h22:3+H-H <sub>2</sub> O] <sup>+</sup>                | C <sub>22</sub> H <sub>38</sub> NO <sup>+</sup>              | 332.29534              | 1.1              |

**Figure S19: LC-MS/MS analysis of GSL d19:3/h22:3 (374-GSL, 14).** A putative structure is presented, supported by a list of fragments detected in MS/MS mode (Metabolomics Standards Initiative level 2 annotation<sup>2</sup>). Fragments were detected in positive ionization MS/MS mode using [M+H]<sup>+</sup> = 804.5981 as the precursor ion (Table 1). The positions of the double bonds and functional groups were assigned based on the most common structures in the Lipid Maps Structure Database (LMSD)<sup>1</sup>.

### GSL d18:0/h22:1 (6)

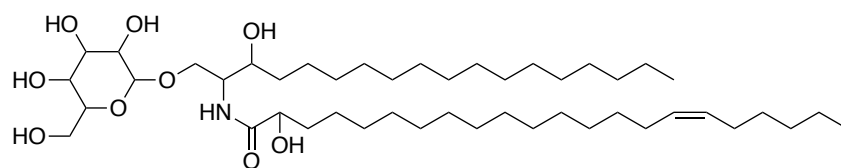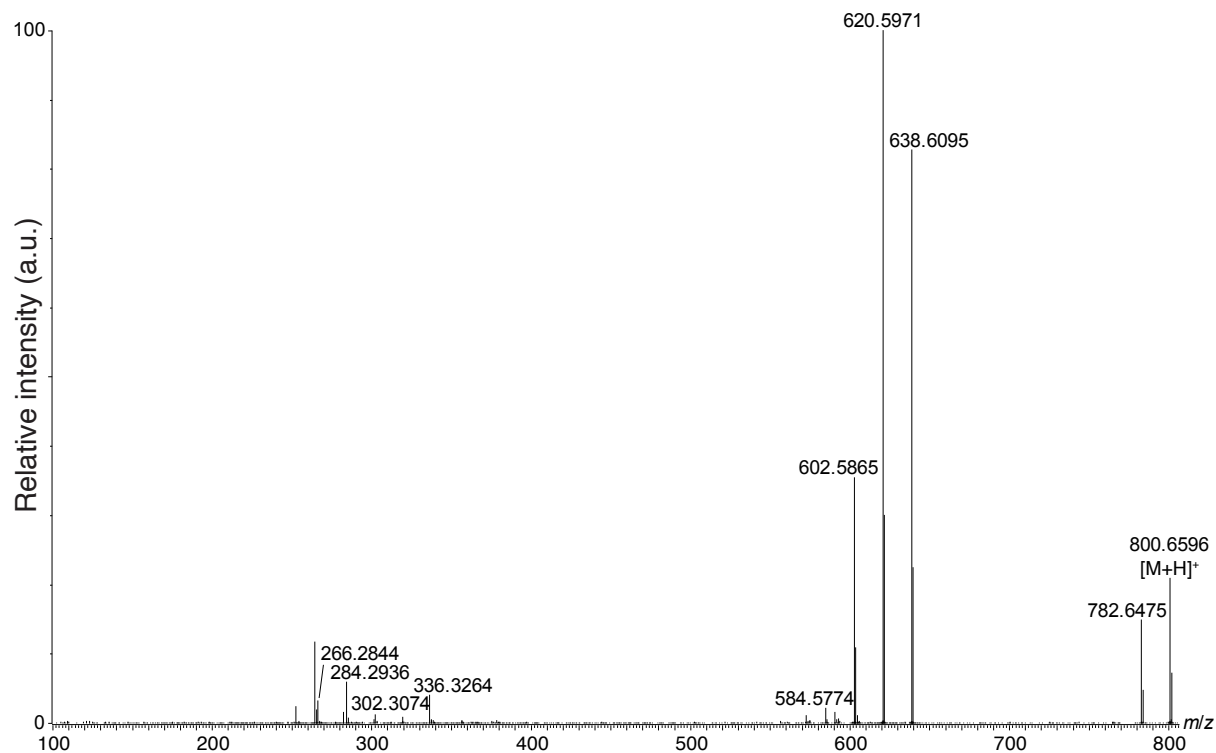

| Observed <i>m/z</i> | Predicted ion                                    | Chemical formula                                             | Theoretical <i>m/z</i> | Mass error (ppm) |
|---------------------|--------------------------------------------------|--------------------------------------------------------------|------------------------|------------------|
| 800.6596            | [M+H] <sup>+</sup>                               | C <sub>46</sub> H <sub>90</sub> NO <sub>9</sub> <sup>+</sup> | 800.6616               | -2.5             |
| 782.6475            | [M+H-H <sub>2</sub> O] <sup>+</sup>              | C <sub>46</sub> H <sub>88</sub> NO <sub>8</sub> <sup>+</sup> | 782.6510               | -4.5             |
| 638.6095            | [M+H-(Hexose-H <sub>2</sub> O)] <sup>+</sup>     | C <sub>40</sub> H <sub>80</sub> NO <sub>4</sub> <sup>+</sup> | 638.6087               | 1.3              |
| 620.5971            | [M+H-Hexose] <sup>+</sup>                        | C <sub>40</sub> H <sub>78</sub> NO <sub>3</sub> <sup>+</sup> | 620.5982               | -1.8             |
| 602.5865            | [M+H-Hexose-H <sub>2</sub> O] <sup>+</sup>       | C <sub>40</sub> H <sub>76</sub> NO <sub>2</sub> <sup>+</sup> | 602.5876               | -1.8             |
| 584.5774            | [M+H-Hexose-2·H <sub>2</sub> O] <sup>+</sup>     | C <sub>40</sub> H <sub>74</sub> NO <sup>+</sup>              | 584.5770               | 0.7              |
| 302.3074            | [LCB d18:0+H] <sup>+</sup>                       | C <sub>18</sub> H <sub>40</sub> NO <sub>2</sub> <sup>+</sup> | 302.3059               | 5.0              |
| 284.2936            | [LCB d18:0+H-H <sub>2</sub> O] <sup>+</sup>      | C <sub>18</sub> H <sub>38</sub> NO <sup>+</sup>              | 284.2953               | -6.0             |
| 266.2844            | [LCB d18:0+H-2·H <sub>2</sub> O] <sup>+</sup>    | C <sub>18</sub> H <sub>36</sub> N <sup>+</sup>               | 266.2848               | -1.5             |
| 336.3264            | [Amino FA h22:1+H-H <sub>2</sub> O] <sup>+</sup> | C <sub>22</sub> H <sub>42</sub> NO <sup>+</sup>              | 336.3266               | -0.6             |

**Figure S20: LC-MS/MS analysis of GSL d18:0/h22:1 (6).** A putative structure is presented, supported by a list of fragments detected in MS/MS mode (Metabolomics Standards Initiative level 2 annotation<sup>2</sup>). Fragments were detected in positive ionization MS/MS mode using [M+H]<sup>+</sup> = 800.6600 as the precursor ion (Table 1). The positions of the double bond and functional groups were assigned based on the most common structures in the Lipid Maps Structure Database (LMSD)<sup>1</sup>.

### GSL d18:1/h22:1 (7)

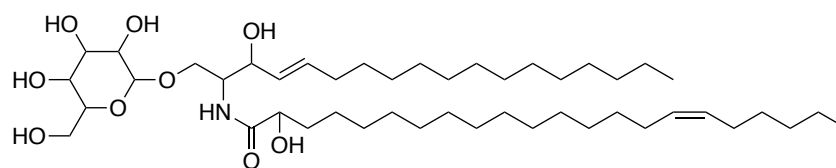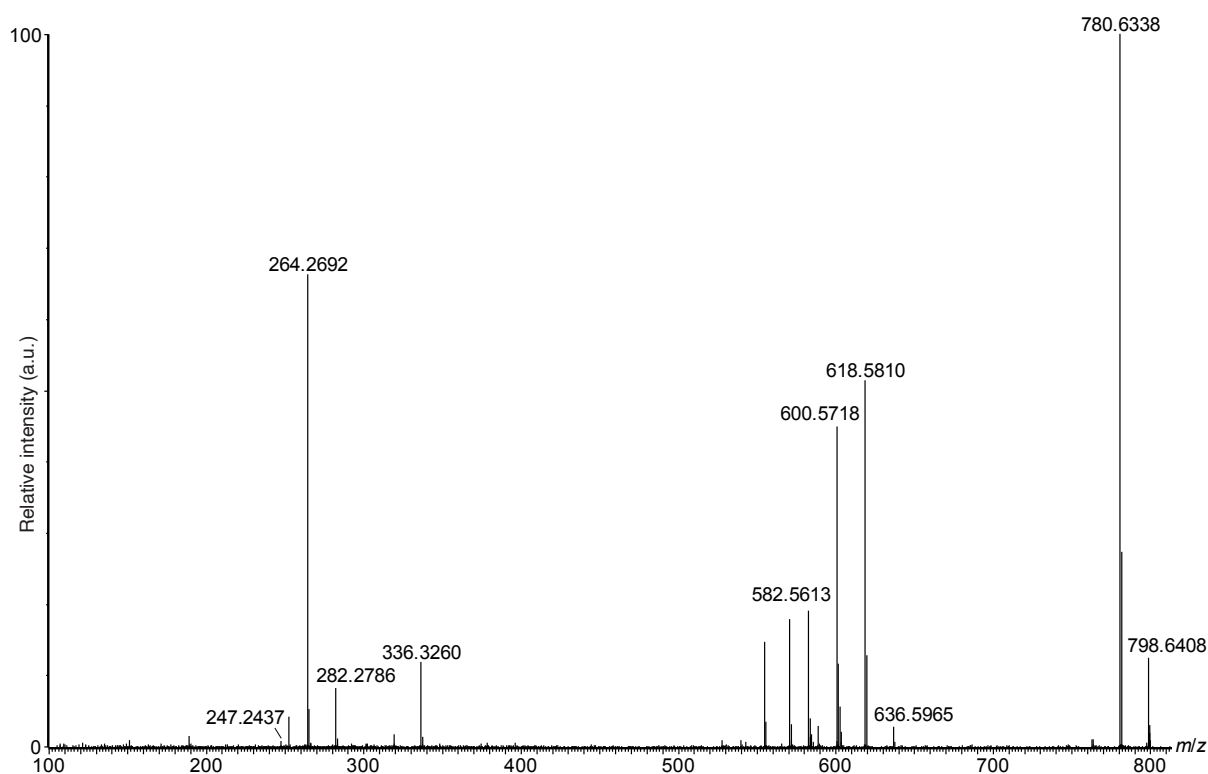

| Observed <i>m/z</i> | Predicted ion                                                  | Chemical formula                                             | Theoretical <i>m/z</i> | Mass error (ppm) |
|---------------------|----------------------------------------------------------------|--------------------------------------------------------------|------------------------|------------------|
| 798.6408            | [M+H] <sup>+</sup>                                             | C <sub>46</sub> H <sub>88</sub> NO <sub>9</sub> <sup>+</sup> | 798.6459               | -6.4             |
| 780.6338            | [M+H-H <sub>2</sub> O] <sup>+</sup>                            | C <sub>46</sub> H <sub>86</sub> NO <sub>8</sub> <sup>+</sup> | 780.6353               | -1.9             |
| 636.5965            | [M+H-(Hexose-H <sub>2</sub> O)] <sup>+</sup>                   | C <sub>40</sub> H <sub>78</sub> NO <sub>4</sub> <sup>+</sup> | 636.5931               | 5.3              |
| 618.5810            | [M+H-Hexose] <sup>+</sup>                                      | C <sub>40</sub> H <sub>76</sub> NO <sub>3</sub> <sup>+</sup> | 618.5825               | -2.4             |
| 600.5718            | [M+H-Hexose-H <sub>2</sub> O] <sup>+</sup>                     | C <sub>40</sub> H <sub>74</sub> NO <sub>2</sub> <sup>+</sup> | 600.5720               | -0.3             |
| 582.5613            | [M+H-Hexose-2·H <sub>2</sub> O] <sup>+</sup>                   | C <sub>40</sub> H <sub>72</sub> NO <sup>+</sup>              | 582.5614               | -0.2             |
| 282.2786            | [LCB d18:1+H-H <sub>2</sub> O] <sup>+</sup>                    | C <sub>18</sub> H <sub>36</sub> NO <sup>+</sup>              | 282.2797               | -3.9             |
| 264.2692            | [LCB d18:1+H-2·H <sub>2</sub> O] <sup>+</sup>                  | C <sub>18</sub> H <sub>34</sub> N <sup>+</sup>               | 264.2691               | 0.4              |
| 247.2437            | [LCB d18:1+H-NH <sub>3</sub> -2·H <sub>2</sub> O] <sup>+</sup> | C <sub>18</sub> H <sub>31</sub> <sup>+</sup>                 | 247.2426               | 4.4              |
| 336.3260            | [Amino FA h22:1+H-H <sub>2</sub> O] <sup>+</sup>               | C <sub>22</sub> H <sub>42</sub> NO <sup>+</sup>              | 336.3266               | -1.8             |

**Figure S21: LC-MS/MS analysis of GSL d18:1/h22:1 (7).** A putative structure is presented, supported by a list of fragments detected in MS/MS mode (Metabolomics Standards Initiative level 2 annotation<sup>2</sup>). Fragments were detected in positive ionization MS/MS mode using [M+H]<sup>+</sup> = 798.6440 as the precursor ion (Table 1). The positions of the double bonds and functional groups were assigned based on the most common structures in the Lipid Maps Structure Database (LMSD)<sup>1</sup>.

GSL t18:0/h22:0 (8)

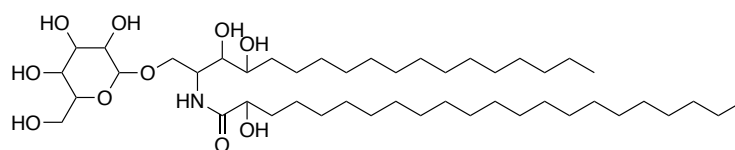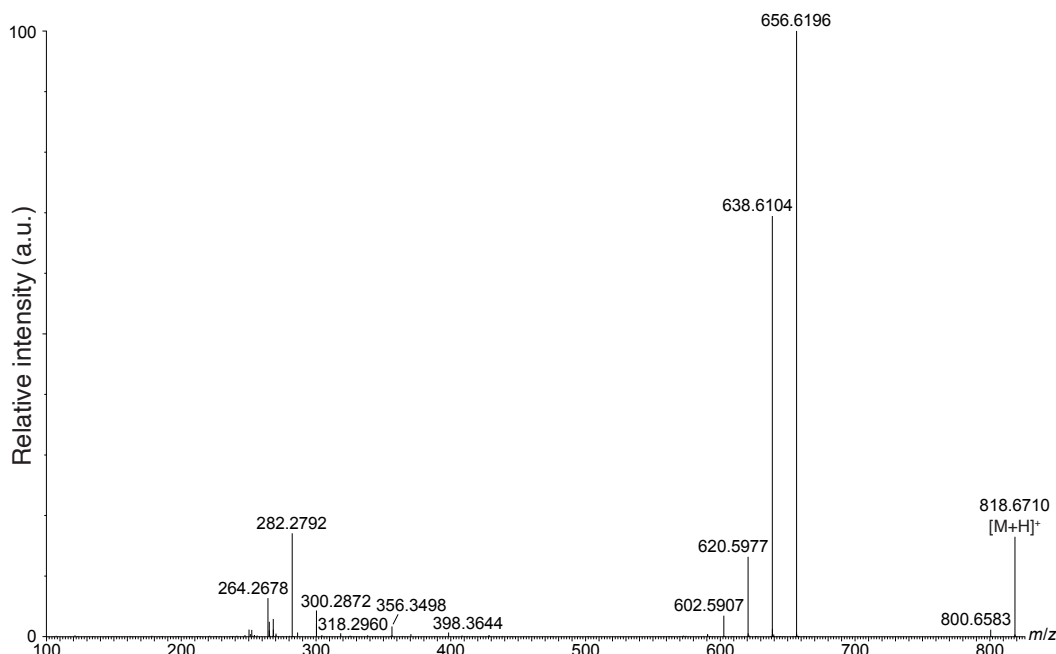

| Observed $m/z$ | Predicted ion                    | Chemical formula        | Theoretical $m/z$ | Mass error (ppm) |
|----------------|----------------------------------|-------------------------|-------------------|------------------|
| 818.6710       | $[M+H]^+$                        | $C_{46}H_{92}NO_{10}^+$ | 818.6721          | -1.3             |
| 800.6583       | $[M+H-H_2O]^+$                   | $C_{46}H_{90}NO_9^+$    | 800.6616          | -4.1             |
| 656.6196       | $[M+H-(Hexose-H_2O)]^+$          | $C_{40}H_{82}NO_5^+$    | 656.6193          | 0.5              |
| 638.6104       | $[M+H-Hexose]^+$                 | $C_{40}H_{80}NO_4^+$    | 638.6087          | 2.7              |
| 620.5977       | $[M+H-Hexose-H_2O]^+$            | $C_{40}H_{78}NO_3^+$    | 620.5982          | -0.8             |
| 602.5907       | $[M+H-Hexose-2 \cdot H_2O]^+$    | $C_{40}H_{76}NO_2^+$    | 602.5876          | 5.1              |
| 318.2960       | $[LCB\ t18:0+H]^+$               | $C_{18}H_{40}NO_3^+$    | 318.3008          | -15.1            |
| 300.2872       | $[LCB\ t18:0+H-H_2O]^+$          | $C_{18}H_{38}NO_2^+$    | 300.2903          | -10.3            |
| 282.2792       | $[LCB\ t18:0+H-2 \cdot H_2O]^+$  | $C_{18}H_{36}NO^+$      | 282.2797          | -1.8             |
| 264.2678       | $[LCB\ t18:0+H-3 \cdot H_2O]^+$  | $C_{18}H_{34}N^+$       | 264.2691          | -4.9             |
| 398.3644       | $[Amino\ FA\ h22:0+H+C_2H_3O]^+$ | $C_{24}H_{48}NO_3^+$    | 398.3634          | 2.5              |
| 356.3498       | $[Amino\ FA\ h22:0+H]^+$         | $C_{22}H_{46}NO_2^+$    | 356.3529          | -8.7             |

**Figure S22: LC-MS/MS analysis of GSL t18:0/h22:0 (8).** A putative structure is presented, supported by a list of fragments detected in MS/MS mode (Metabolomics Standards Initiative level 2 annotation<sup>2</sup>). Fragments were detected in positive ionization MS/MS mode using  $[M+H]^+ = 818.6702$  as the precursor ion (Table 1). The positions of the functional groups were assigned based on the most common structures in the Lipid Maps Structure Database (LMSD)<sup>1</sup>.

GSL t18:0/h22:2 (10)

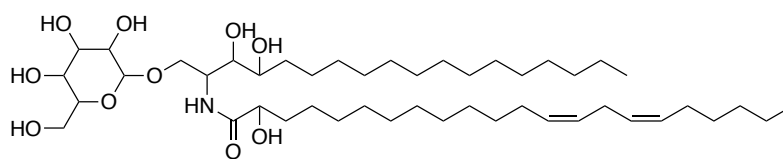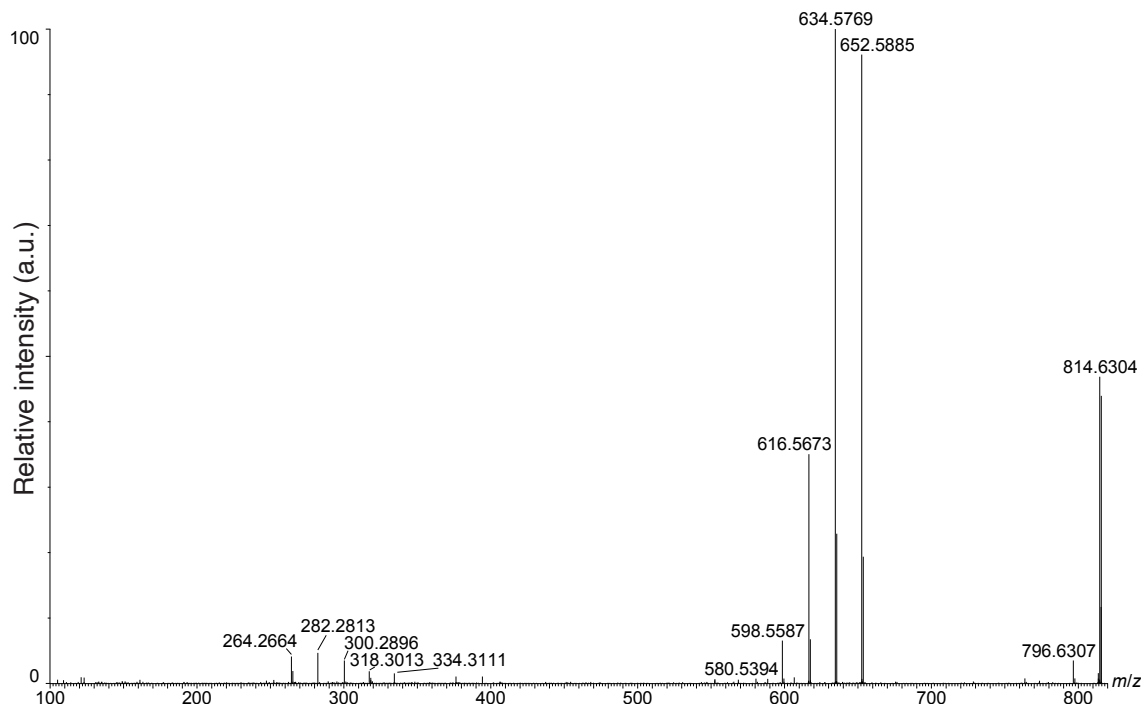

| Observed <i>m/z</i> | Predicted ion                                    | Chemical formula                                              | Theoretical <i>m/z</i> | Mass error (ppm) |
|---------------------|--------------------------------------------------|---------------------------------------------------------------|------------------------|------------------|
| 814.6304            | [M+H] <sup>+</sup>                               | C <sub>46</sub> H <sub>88</sub> NO <sub>10</sub> <sup>+</sup> | 814.6408               | -12.8            |
| 796.6307            | [M+H-H <sub>2</sub> O] <sup>+</sup>              | C <sub>46</sub> H <sub>86</sub> NO <sub>9</sub> <sup>+</sup>  | 796.6303               | 0.5              |
| 652.5885            | [M+H-(Hexose-H <sub>2</sub> O)] <sup>+</sup>     | C <sub>40</sub> H <sub>78</sub> NO <sub>5</sub> <sup>+</sup>  | 652.5880               | 0.8              |
| 634.5769            | [M+H-Hexose] <sup>+</sup>                        | C <sub>40</sub> H <sub>76</sub> NO <sub>4</sub> <sup>+</sup>  | 634.5774               | -0.8             |
| 616.5673            | [M+H-Hexose-H <sub>2</sub> O] <sup>+</sup>       | C <sub>40</sub> H <sub>74</sub> NO <sub>3</sub> <sup>+</sup>  | 616.5669               | 0.6              |
| 598.5587            | [M+H-Hexose-2·H <sub>2</sub> O] <sup>+</sup>     | C <sub>40</sub> H <sub>72</sub> NO <sub>2</sub> <sup>+</sup>  | 598.5563               | 4.0              |
| 580.5394            | [M+H-Hexose-3·H <sub>2</sub> O] <sup>+</sup>     | C <sub>40</sub> H <sub>70</sub> NO <sup>+</sup>               | 580.5457               | -10.9            |
| 318.3013            | [LCB t18:0+H] <sup>+</sup>                       | C <sub>18</sub> H <sub>40</sub> NO <sub>3</sub> <sup>+</sup>  | 318.3008               | 1.6              |
| 300.2896            | [LCB t18:0+H-H <sub>2</sub> O] <sup>+</sup>      | C <sub>18</sub> H <sub>38</sub> NO <sub>2</sub> <sup>+</sup>  | 300.2903               | -2.3             |
| 282.2813            | [LCB t18:0+H-2·H <sub>2</sub> O] <sup>+</sup>    | C <sub>18</sub> H <sub>36</sub> NO <sup>+</sup>               | 282.2797               | 5.7              |
| 264.2664            | [LCB t18:0+H-3·H <sub>2</sub> O] <sup>+</sup>    | C <sub>18</sub> H <sub>34</sub> N <sup>+</sup>                | 264.2691               | -10.2            |
| 334.3111            | [Amino FA h22:1+H-H <sub>2</sub> O] <sup>+</sup> | C <sub>22</sub> H <sub>40</sub> NO <sup>+</sup>               | 334.3110               | 0.3              |

**Figure S23: LC-MS/MS analysis of GSL t18:0/h22:2 (10).** A putative structure is presented, supported by a list of fragments detected in MS/MS mode (Metabolomics Standards Initiative level 2 annotation<sup>2</sup>). Fragments were detected in positive ionization MS/MS mode using [M+H]<sup>+</sup> = 814.6346 as the precursor ion (Table 1). The positions of the double bonds and functional groups were assigned based on the most common structures in the Lipid Maps Structure Database (LMSD)<sup>1</sup>.

GSL d19:4/h22:1 (resGSL, 11)

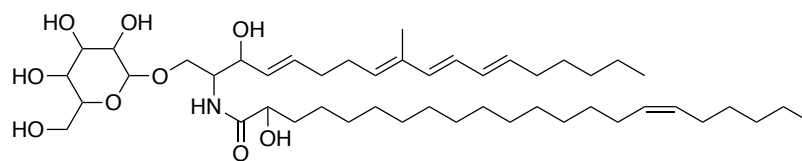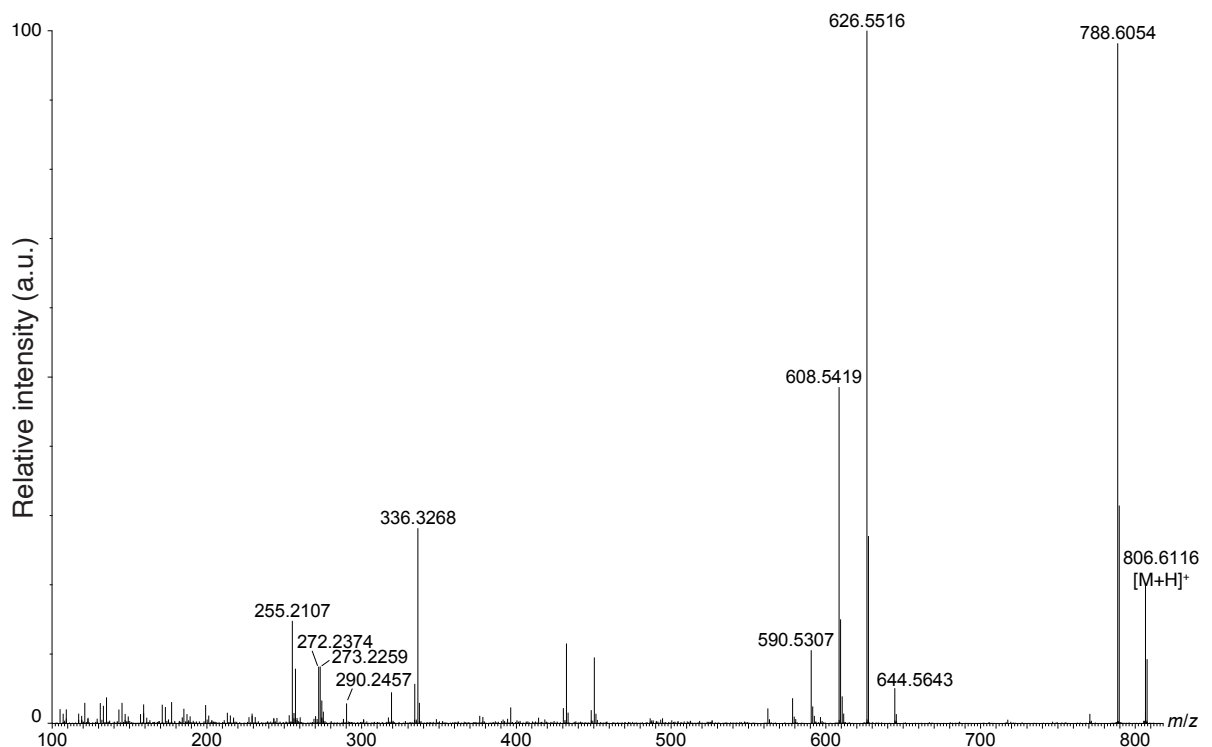

| Observed <i>m/z</i> | Predicted ion                                                  | Chemical formula                                             | Theoretical <i>m/z</i> | Mass error (ppm) |
|---------------------|----------------------------------------------------------------|--------------------------------------------------------------|------------------------|------------------|
| 806.6116            | [M+H] <sup>+</sup>                                             | C <sub>47</sub> H <sub>84</sub> NO <sub>9</sub> <sup>+</sup> | 806.6146               | -3.7             |
| 788.6054            | [M+H-H <sub>2</sub> O] <sup>+</sup>                            | C <sub>47</sub> H <sub>82</sub> NO <sub>8</sub> <sup>+</sup> | 788.6040               | 1.8              |
| 644.5643            | [M+H-(Hexose-H <sub>2</sub> O)] <sup>+</sup>                   | C <sub>41</sub> H <sub>74</sub> NO <sub>4</sub> <sup>+</sup> | 644.5618               | 3.9              |
| 626.5516            | [M+H-Hexose] <sup>+</sup>                                      | C <sub>41</sub> H <sub>72</sub> NO <sub>3</sub> <sup>+</sup> | 626.5512               | 0.6              |
| 608.5419            | [M+H-Hexose-H <sub>2</sub> O] <sup>+</sup>                     | C <sub>41</sub> H <sub>70</sub> NO <sub>2</sub> <sup>+</sup> | 608.5407               | 2.0              |
| 590.5307            | [M+H-Hexose-2·H <sub>2</sub> O] <sup>+</sup>                   | C <sub>41</sub> H <sub>68</sub> NO <sup>+</sup>              | 590.5301               | 1.0              |
| 290.2457            | [LCB d19:4+H-H <sub>2</sub> O] <sup>+</sup>                    | C <sub>19</sub> H <sub>32</sub> NO <sup>+</sup>              | 290.2484               | -9.3             |
| 272.2374            | [LCB d19:4+H-2·H <sub>2</sub> O] <sup>+</sup>                  | C <sub>19</sub> H <sub>30</sub> N <sup>+</sup>               | 272.2378               | -1.5             |
| 273.2259            | [LCB d19:4+H-NH <sub>3</sub> -H <sub>2</sub> O] <sup>+</sup>   | C <sub>19</sub> H <sub>29</sub> O <sup>+</sup>               | 273.2218               | 15.0             |
| 255.2107            | [LCB d19:4+H-NH <sub>3</sub> -2·H <sub>2</sub> O] <sup>+</sup> | C <sub>19</sub> H <sub>27</sub> <sup>+</sup>                 | 255.2113               | -2.4             |
| 336.3268            | [Amino FA h22:1+H-H <sub>2</sub> O] <sup>+</sup>               | C <sub>22</sub> H <sub>42</sub> NO <sup>+</sup>              | 336.3266               | 0.6              |

**Figure S24: LC-MS/MS analysis of GSL d19:4/h22:1 (resGSL, 11).** A putative structure is presented, supported by a list of fragments detected in MS/MS mode (Metabolomics Standards Initiative level 2 annotation<sup>2</sup>). Fragments were detected in positive ionization MS/MS mode using [M+H]<sup>+</sup> = 806.6127 as the precursor ion (Table 1). The positions of the double bonds and functional groups were assigned based on the most common structures in the Lipid Maps Structure Database (LMSD)<sup>1</sup>.



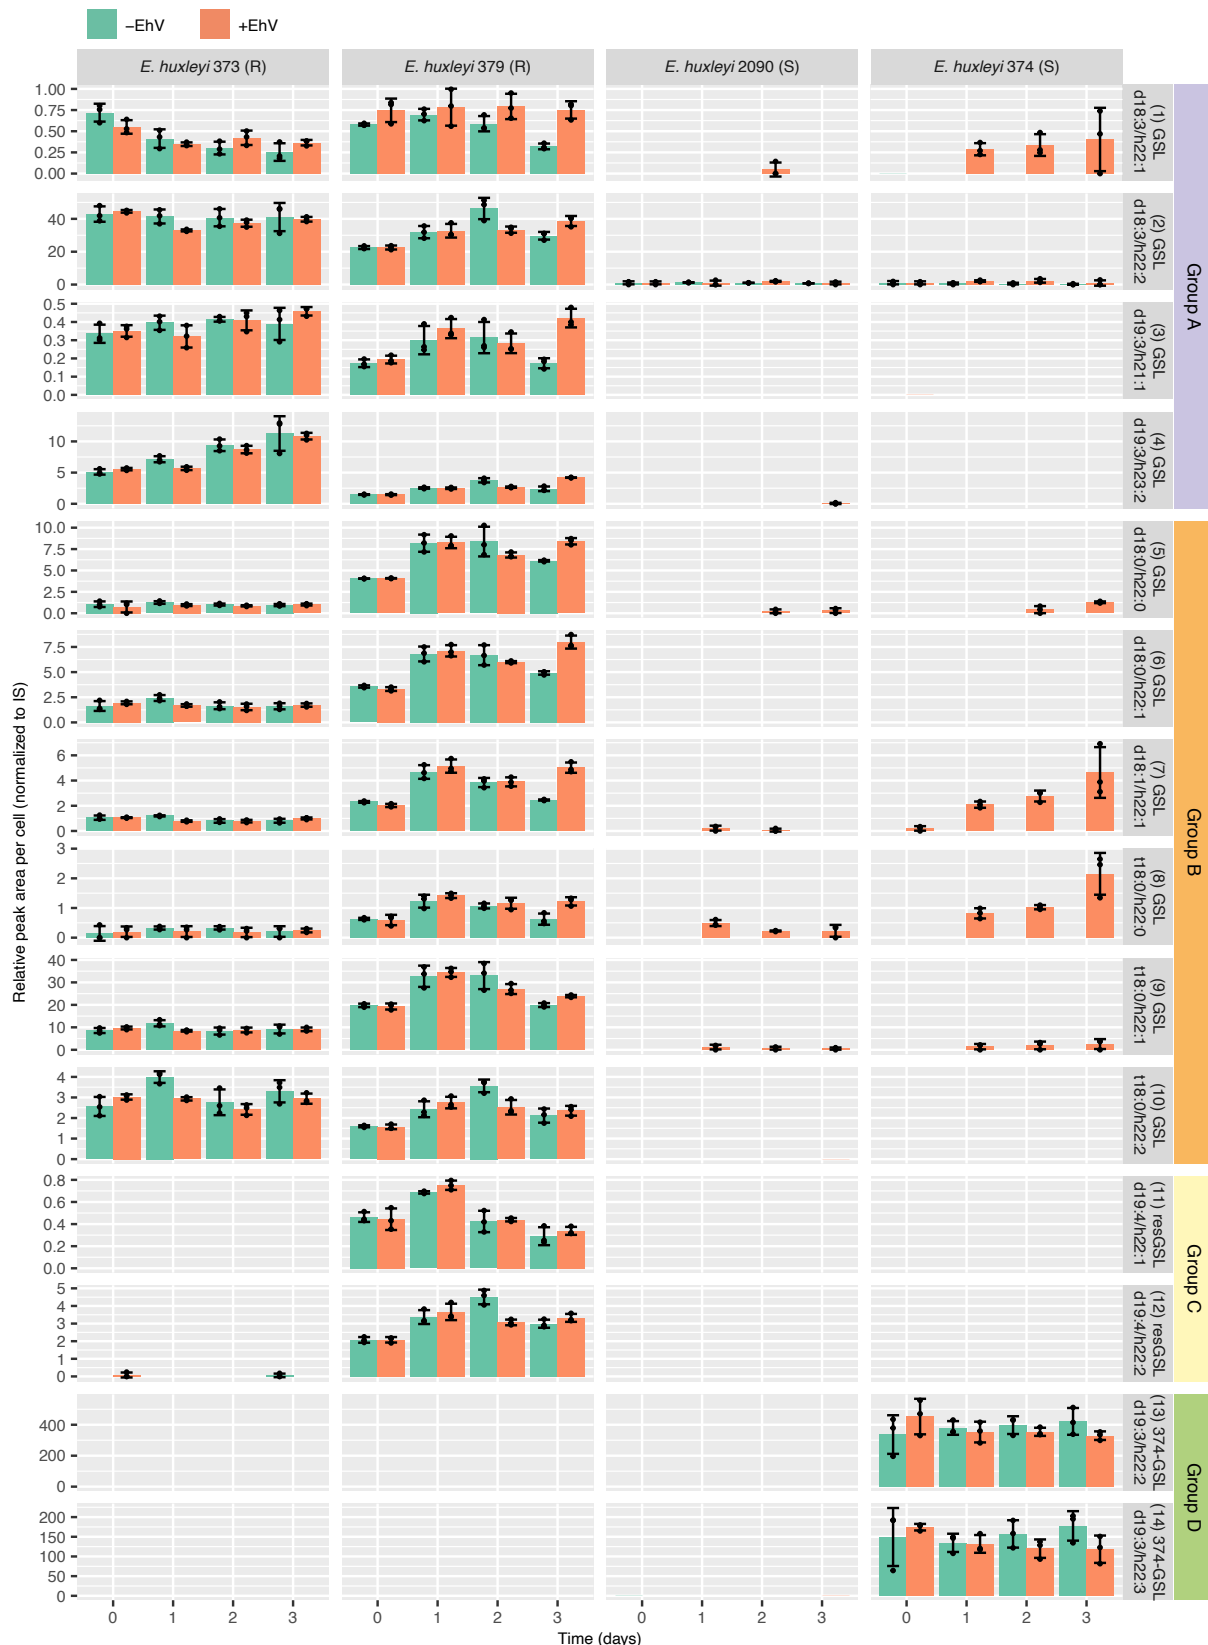

**Figure S25: Temporal profiles of differential GSL species in two resistant (R) and two susceptible (S) *E. huxleyi* strains, with and without addition of EhV.** The bar graphs show the mean relative peak area per cell  $\pm$  SD ( $n = 3$ ) of cultures without addition of EhV (-EhV) and with addition of EhV (+EhV). Peak areas were normalized to the internal standard (IS) glucosylceramide d18:1/c12:0. GSL species are numbered and ordered based on Table 1. An additional analysis with higher sensitivity was performed for some GSLs species, as shown in Fig. S19.

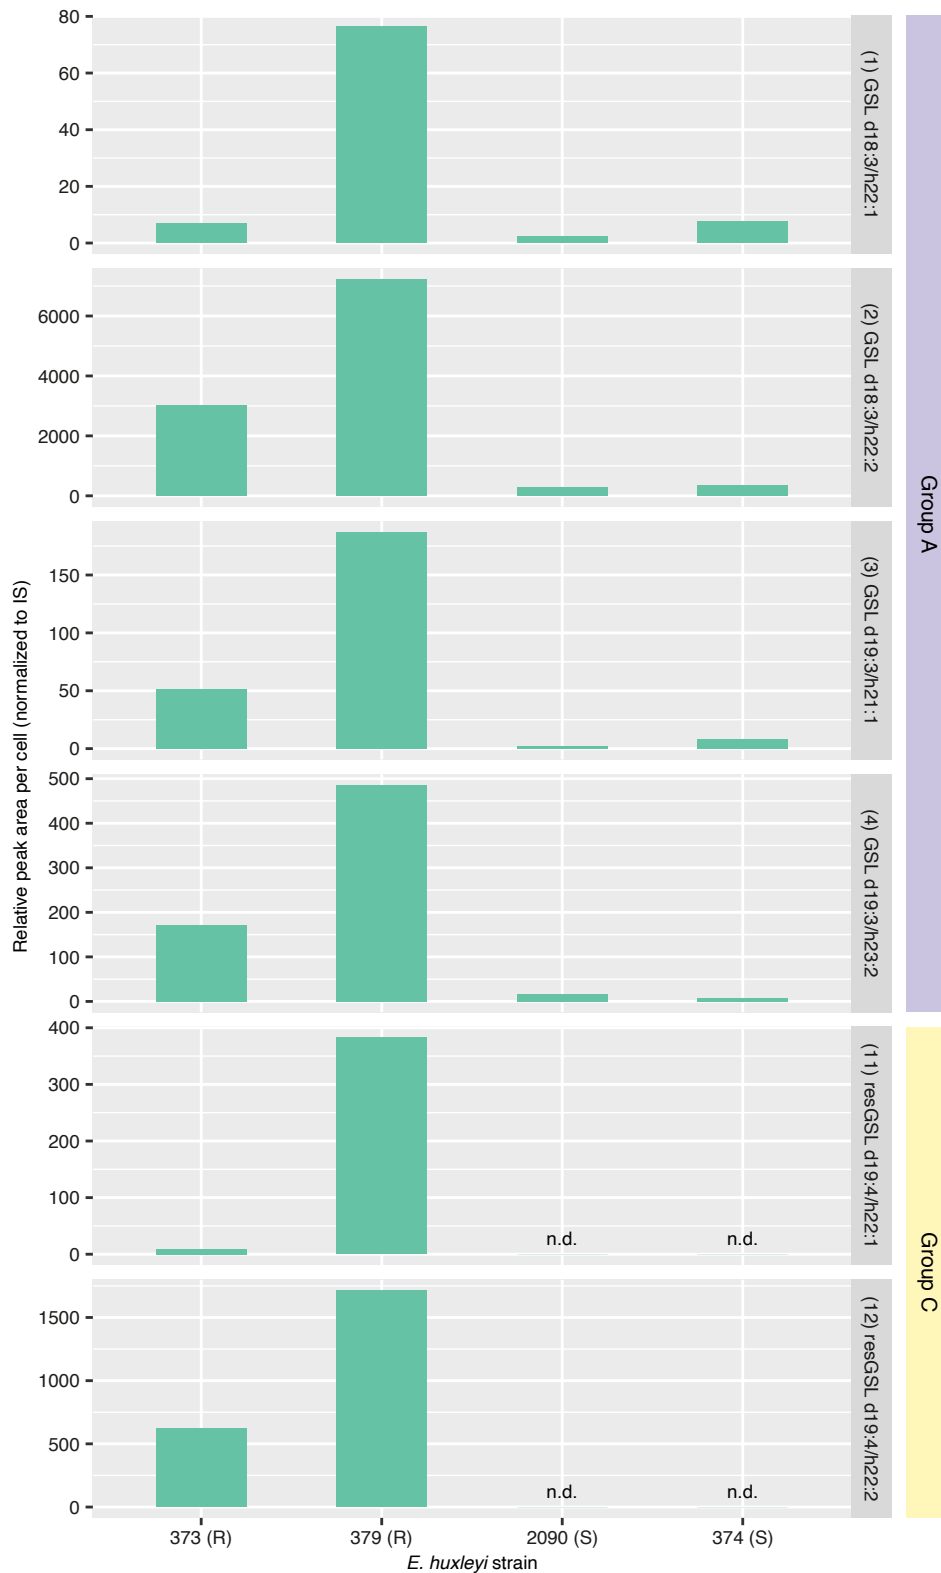

**Figure S26: High sensitivity analysis of selected GSL species in two resistant (R) and two susceptible (S) *E. huxleyi* strains without addition of EhV.** This analysis was performed to verify detection of GSL species that had low intensity in the untargeted lipidomics profiling. The bar graphs show the relative peak area per cell of each sample type ( $n = 1$ ). Peak intensities were normalized to the IS glucosylceramide d18:1/c12:0. GSL species are numbered and ordered based on Table 1. n.d., not detected.



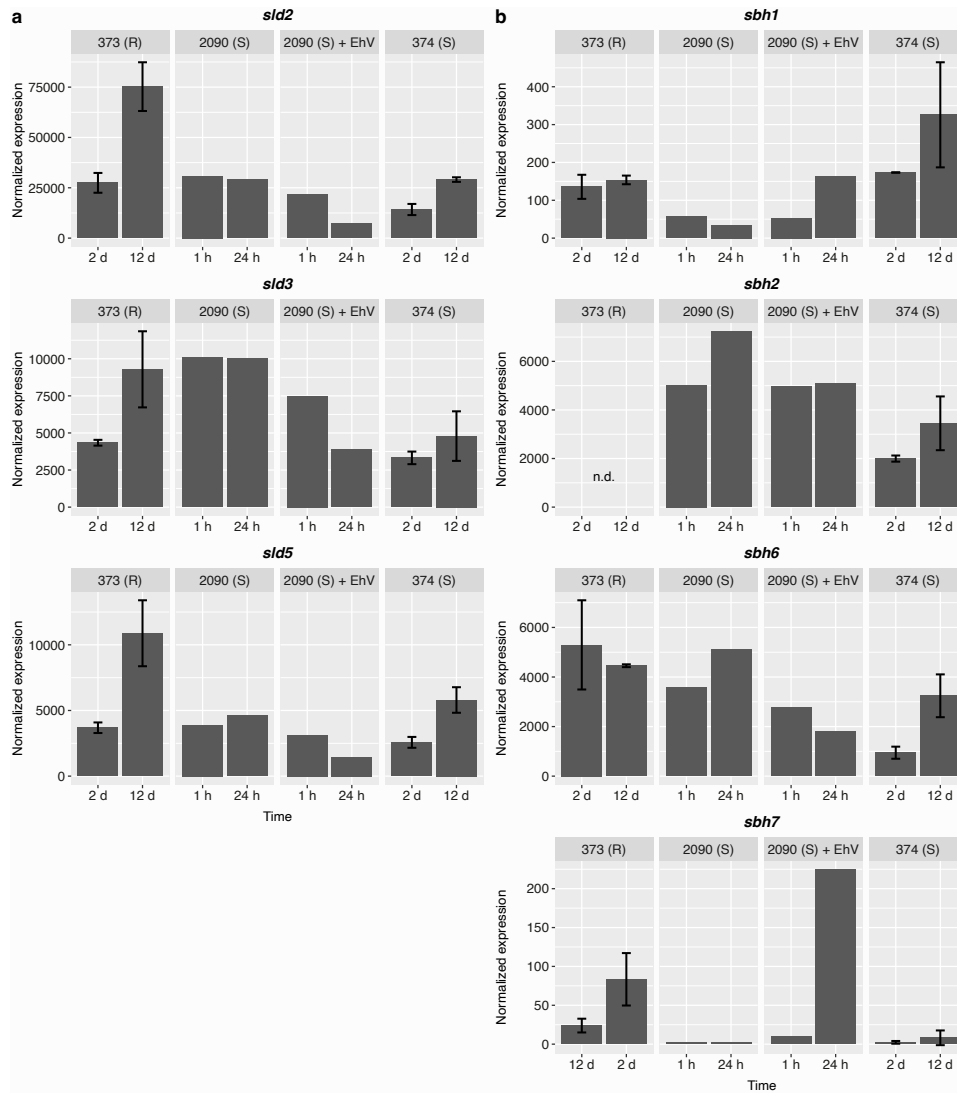

**Figure S28: Expression of sphingolipid desaturase (*sld*) and sphingoid base hydroxylase (*sbh*) genes in *E. huxleyi* strain 373, 2090 and 374.** Normalized expression of (a) *sld* and (b) *sbh* genes in the resistant (R) *E. huxleyi* strain 373 during the exponential (2 d) and stationary (12 d) growth phases, in the susceptible (S) *E. huxleyi* strain 2090 with and without addition of EhV at 1 h and 24 h, and in the susceptible *E. huxleyi* strain 374 during the exponential and stationary growth phases. Expression of *sbh3* was below limit of detection in all strains and conditions tested. Data was taken from Feldmesser *et al.* 2021<sup>4</sup>. Values for *E. huxleyi* strains 373 and 374 are presented as the mean ± SD (*n* = 2).

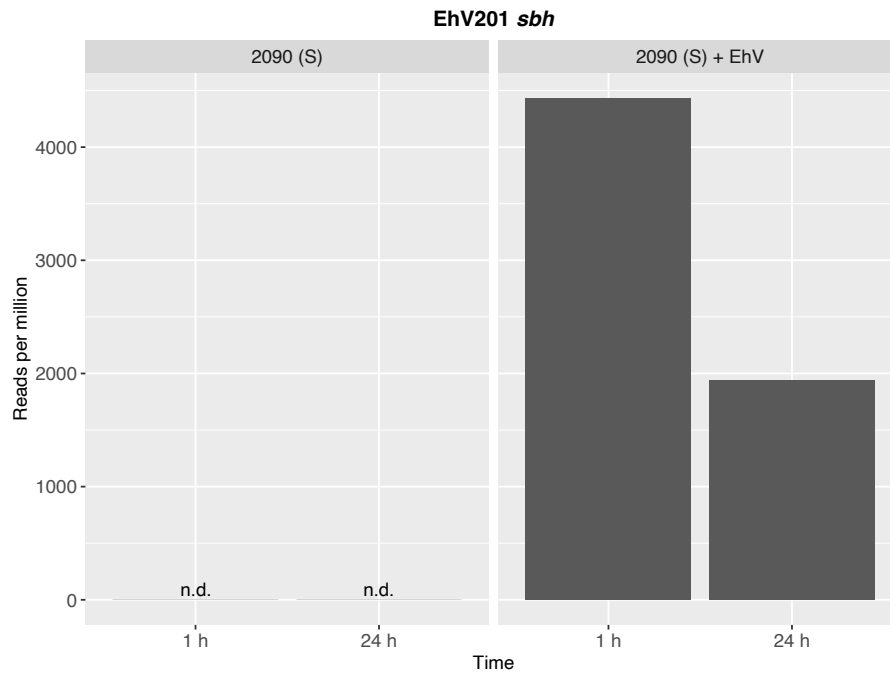

**Figure S29: Expression of EhV201 sphingoid base hydroxylase (*sbh*) during infection of the susceptible *E. huxleyi* strain 2090.** Data taken from Rosenwasser *et al.*, 2014<sup>5</sup> ( $n = 1$ ). n.d., not detected.

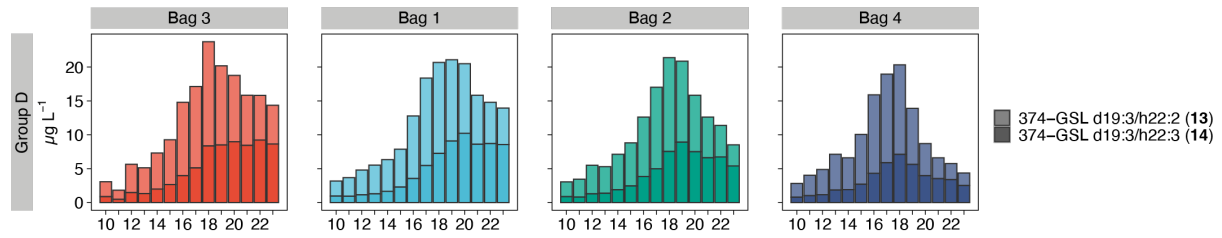

**Figure S30: Changes in cellular content of 374-GSL species (group D) in response to viral infection of natural *E. huxleyi* populations in a mesocosm experiment.** Concentration of 374-GSL species correlates with the population dynamics in the four bags (Table S7). Bags are ordered by increasing EhV abundance, with the lowest abundance in bag 3 and the highest in bag 4, as presented in Fig. 5b.



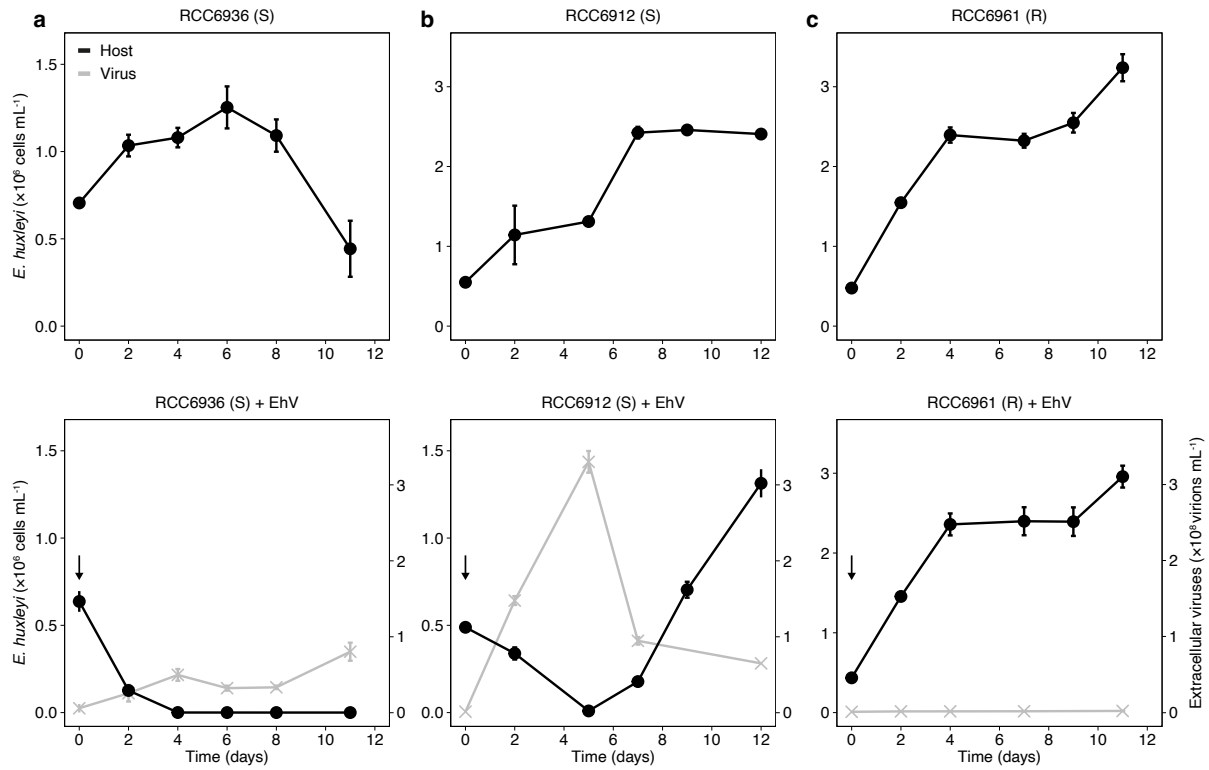

**Figure S31: *E. huxleyi* isolates from the mesocosm experiment display different infection dynamics.** (a) *E. huxleyi* isolate RCC6936 is susceptible (S) to EhVM1. (b) *E. huxleyi* isolate RCC6912 is susceptible to EhVM1, however, a resistant population recovers one week following infection. (c) *E. huxleyi* isolate RCC6961 is resistant (R) to EhVM1. *E. huxleyi* cell abundance (black) in cultures without (top) and with addition of EhVM1 (bottom) are presented, as well as the abundance of extracellular viruses (grey) in cultures with EhV. The black arrows indicate the addition of EhVM1 to the cultures. Values are presented as the mean  $\pm$  SD ( $n = 2$ ).

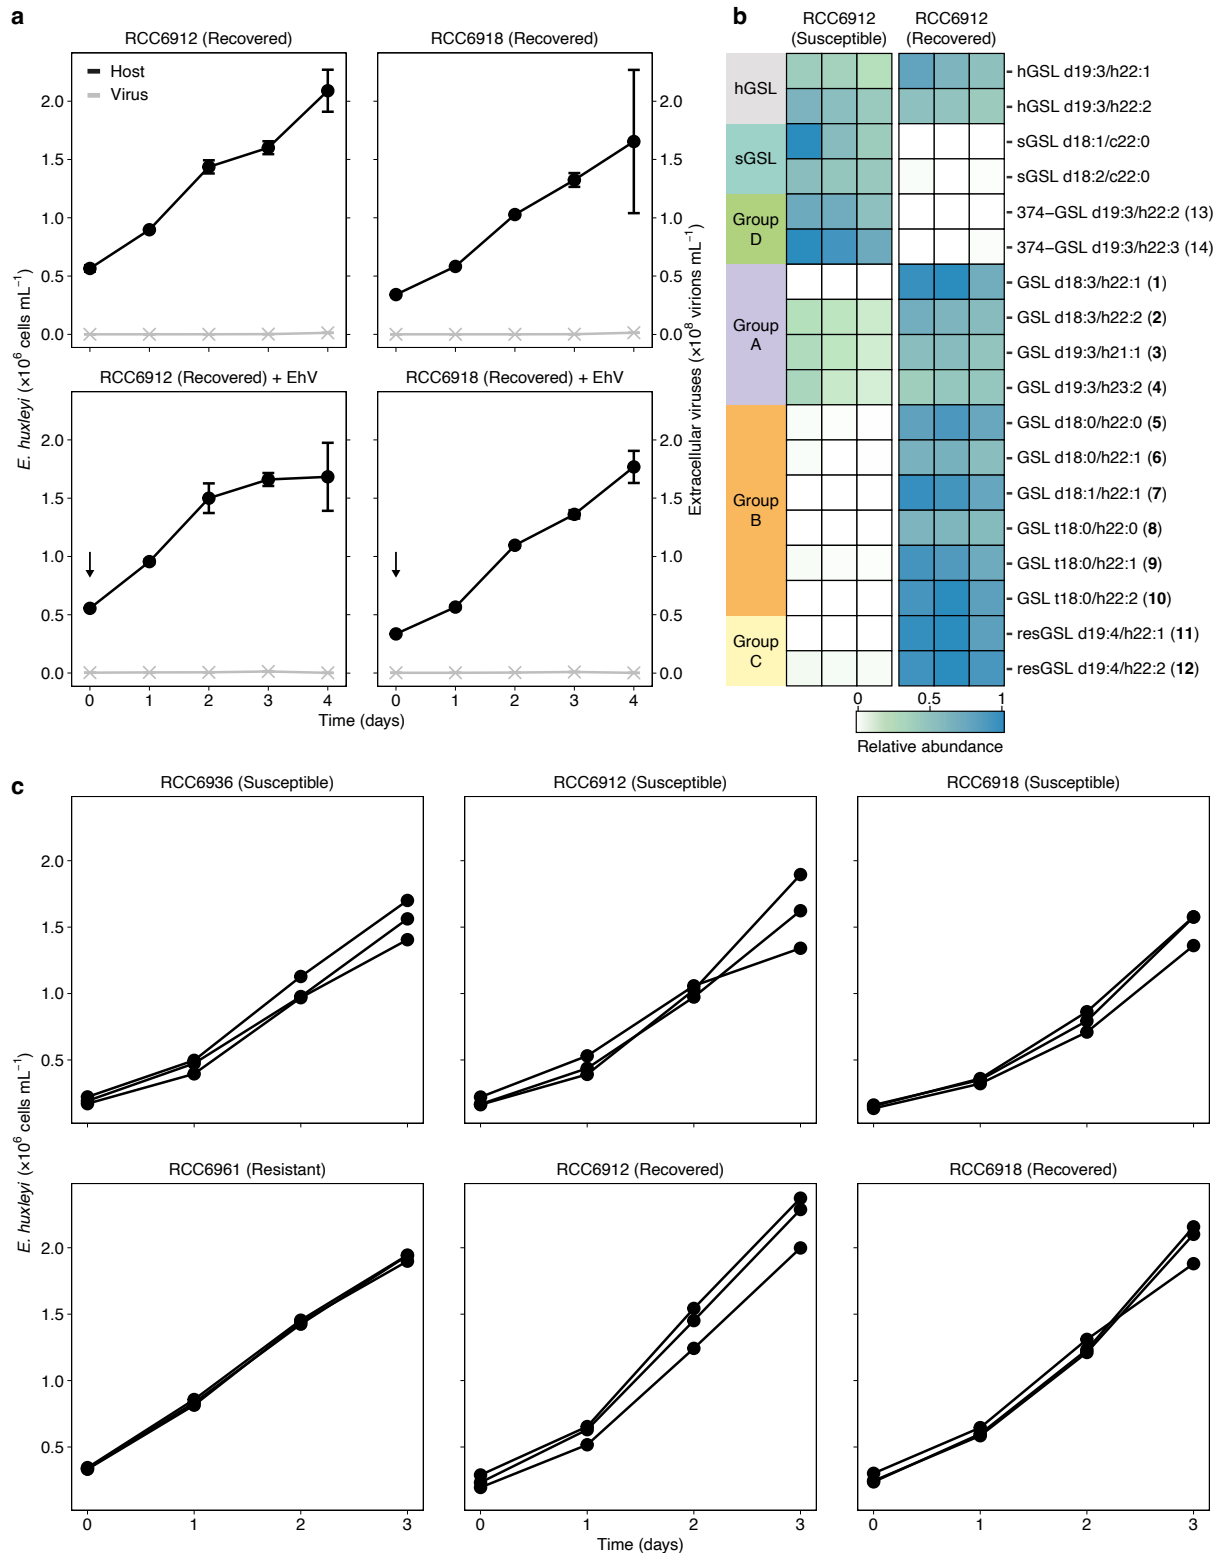

**Figure S32: Resistance of the recovered cultures of *E. huxleyi* isolates RCC6912 and RCC6918 and the GSL composition of *E. huxleyi* isolate RCC6912. (a)** Recovered cultures of *E. huxleyi* isolates RCC6912 and RCC6918 are resistant to the virus. *E. huxleyi* cell abundance (black) in cultures without (top) and with (bottom) addition of EhVM1 are presented, as well as abundance of extracellular viruses (grey) in cultures with EhVM1. Values are presented as the mean  $\pm$  SD ( $n = 2$ ). The black arrows indicate the addition of EhVM1 to the cultures. **(b)** GSL composition of the susceptible *E. huxleyi* isolate RCC6912 and of the cultures that recovered following infection and were resistant to the virus ( $n = 3$ ). GSL species are grouped and numbered based on Table 1. **(c)** *E. huxleyi* cell abundance in exponentially growing cultures used for analysis of GSL composition ( $n = 3$ ). The cultures were extracted at day 3 of the experiment.

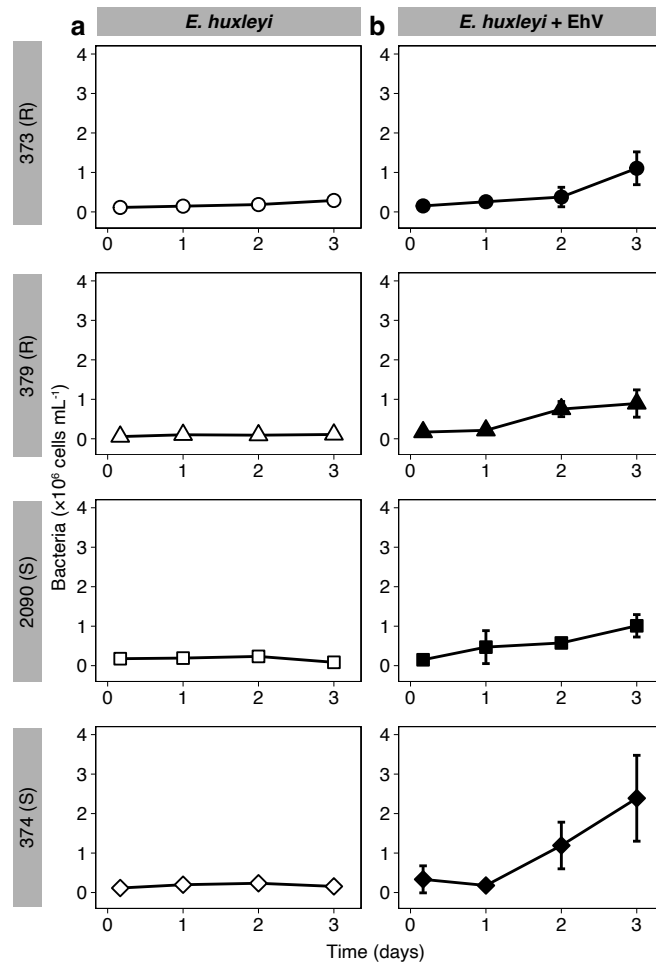

**Figure S33: Quantification of bacteria in cultures of two resistant and two susceptible *E. huxleyi* strains, with and without addition of EhV. (a) Bacterial abundance during the growth of the resistant (R) *E. huxleyi* strains 373 and 379 and the susceptible (S) *E. huxleyi* strains 2090 and 374. (b) Bacterial abundance following the addition of EhV201. Values for (a) and (b) are presented as the mean  $\pm$  SD ( $n = 3$ ).**

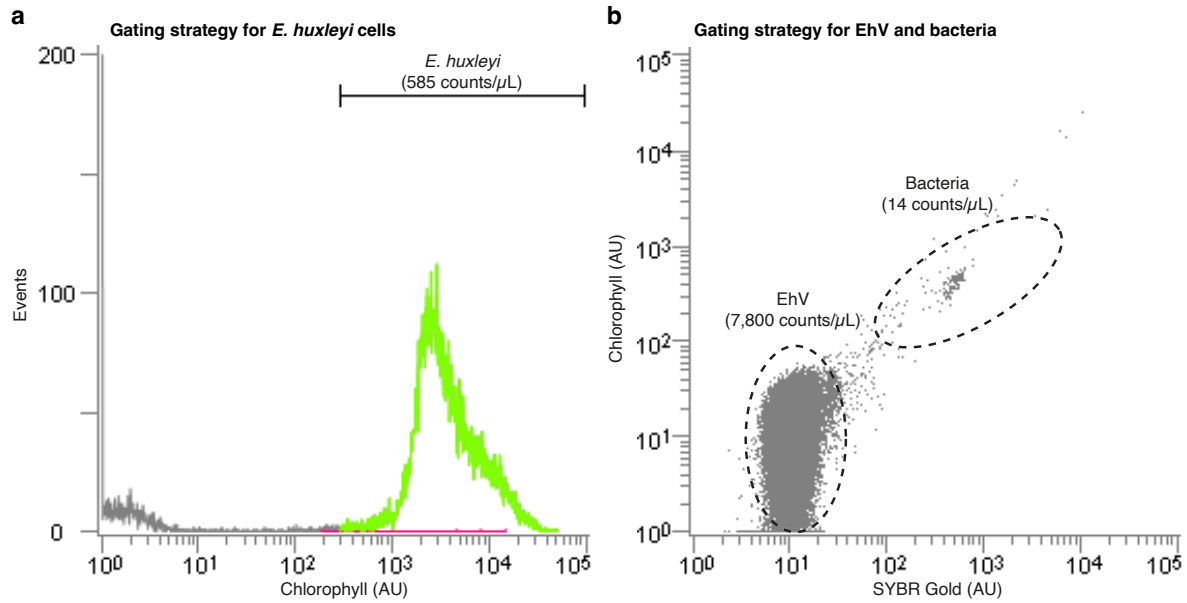

**Figure S34: Enumeration of *E. huxleyi* cells, EhV and bacteria using flow cytometry.** (a) Enumeration of *E. huxleyi* cells. Cells were identified by plotting the autofluorescence of chlorophyll (ex: 488, em: 663-737 nm). A threshold was applied based on the forward scatter signal to reduce the background noise. (b) Enumeration of EhV and bacteria. Flow cytometric analysis was performed with excitation at 488 nm and emission at 525 nm. A threshold was applied based on the forward scatter signal to reduce the background noise. The gates 'EhV' and 'Bacteria' were set by comparing to reference samples containing either EhV201 or bacteria.

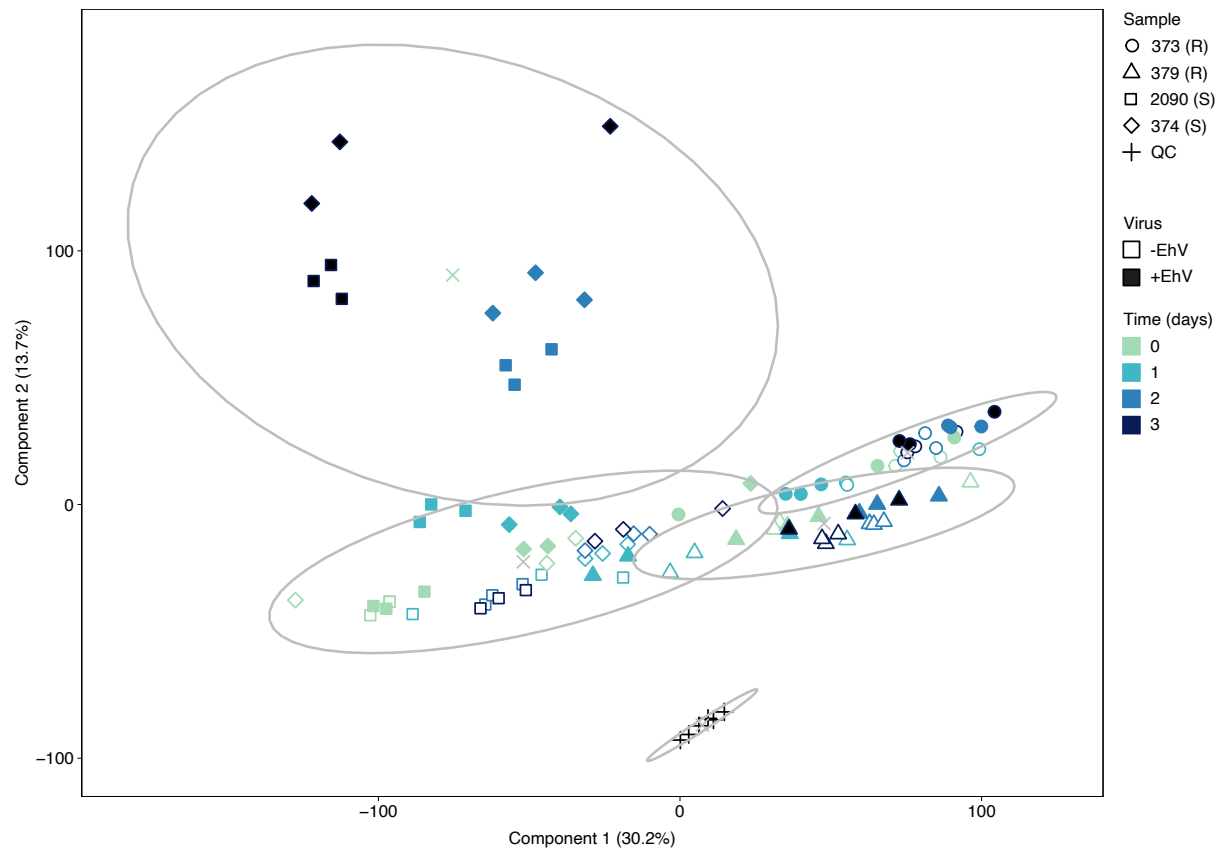

**Figure S35: *k*-Means clustering including the pooled QC samples.** Clustering of resistant and susceptible *E. huxleyi* strains with and without addition of EhV together with the pooled QC samples based on untargeted lipidomics (using 12,190 mass features) and *k*-means clustering ( $k = 5$ ), as visualized by PCA. Percentage of explained variance is stated in parentheses. Each cluster is surrounded by an ellipse, with the mean marked by 'x'.

CLUSTAL format alignment by MAFFT (v7.475)

E. huxleyi\_SLD3 HMLGAALMGVFWQQLAGIG-HDLGH---SGVT--HSFR----RDHL----VGSLL-SAFM  
C. tobini3 HMSGAVLMGVFWQQLAGIG-HDLGH---SGVT--HDFH----RDHR----IGSTL-SALM  
I. galbana HMLGATVMGIFWQQLAGIG-HDLGH---SGVS--HMFY----TDMC----VGS'IIGNALM  
C. roenbergensis2 HMAGAVFLALFWQQAFFG-HDIGH---NAV--HVRK----SDSW----WGMVVMGNITG  
O. tauri2 HMLGAVSLGLFWQQSMFIG-HDAGH---SSIT--FNRS----SDAM----IGWTFVGNLFN  
M. pusilla3 RALGACLLGLFWQQSMFIG-HDAGH---GAIT--HDHR----RDFL----VGLVVGNLNLCN  
S. asiatica2 HLLCGGLMGFLWIQSGWIG-HDSGH---YQVM--PTRK----LNRV----AQILSGNCLA  
H. impetiginosus2 HLFCCGGLMGFLWIQSGWIG-HDSGH---YQVM--LTPN----LNRV----AQILSGNCLA  
T. cacao2 HLCSSGLMGFLWIQSGWIG-HDSGH---YQVM--CNRK----FNRL----FAIVDGNCLA  
C. follicularis2 HCCAVLMGLMWIQSGWIG-HDSGH---YQIM--PSPE----CNRV----VQVLSGNCLA  
P. trichocarpa2 RLVCCGGLMGFLWIQSGWIG-HDSGH---YQVM--SSRG----FNCL----VQVLSGNCLA  
A. trichopoda2 HIGCGCIMGIWITQSGWIG-HDSGH---YQVL--SNGK----LNRV----LQVLTGNCLT  
N. colorata2 HVGSGCLMGFVWIQSGWIG-HDSGH---HKFI--KNTA----LNRV----AQVLSGNCLT  
T. turgidum2 HMFAGGLIGFIWIQSGWIG-HDSGH---HQIT--KHPA----LNRV----LQVVSNGCLT  
B. distachyon HLFSGGLIGFIWIQSGWIG-HDSGH---HQLT--THPA----LNRV----LQVLSGNCLT  
O. sativa2 HLLAGGLIGFIWIQSGWIG-HDSGH---HRIT--GHAA----LDRV----LQVLSGNCLT  
P. miliaceum2 HLLAGGLIGFVWIQSGWIG-HDSGH---HRIT--GHPL----LNRV----VQVLSGNCLT  
A. leveillei HAACAGLLGILWMIQSGWIG-HDSGH---YNVM--LTPK----LNRV----VQVLSGNCLT  
A. thaliana2 HLI SA VLLG LLLW IQSAYVG-HDSGH---YTVT--STKP----CNKL----IQVLSGNCLT  
P. patens2 HMLSAAMLGVVWVWQSGWIG-HDSGH---CGMF--KNPN----LDRV----FAIVDGNCLT  
S. moellendorffii2 HCASAVLLGFAWIQAGWIG-HDTGH---TGMT--GSPR----ADSW----IGLLIGNALS  
K. nitens3 HLASGLLLGLFWQQAFFG-HDTGH---LSIT--RTRS----LDRV----IGLFGVNMCT  
A. millepora2 QVASSFTMAAFWQQAFFG-HDGGH---MAIT--HDFK----TDWK----IGIFVGNMCT  
E. pallida2 QIFGGVLVAVFWQQAFFG-HDAGH---HAIT--HNGT----WDDR----IGLFGVNMCT  
N. vectensis QVAAGILVAVFWQQAFFG-HDAGH---HAIF--HDEQ----WDDR----LGLVVGNLTL  
E. siliculosus QLCGAGLVGFYQQLAFILG-HDAGH---RSHT--ADRA----SDDF----TAYCLILPL  
T. pseudonana HMLAAVLLGFIWQQAFFG-HDCGH---MSAR--THA----RDHIDVPLKALV-TFFN  
E. huxleyi\_SLD4 ILLSAALLALALQQAFFG-HDTLH---NGVL--ARPR----GRTWRRRAALQNLNAGALL  
Isochrysis ILLSAALLALSLLQQAFFG-HDTLH---NGVF--CRPR----GQGLSRSLLAQNLNAGALL  
S. microadriaticum TFVAGAAMGIAWQQAFFLA-HDADH---WGIT--SPPS----GSSF--NPLSWFLASVLF  
C. roenbergensis3 AALGGALVGLGIQQAFFLA-HDAAH---RGVI--PSRP----GGGF--NFLAWALGGPFI  
B. floridae HGLAGVFLAFFWQQAFFG-HDILH---HQAF--DDQR----LTYL----AGLVVAPLSF  
M. pusilla4 RILGAALLGLFWQQAFFLA-HDACH---RVMT--TNTK----VDKW----IGSVFGTLIG  
E. huxleyi\_SLD2 YLAIAYVFGATITQALFLAIHELH---NLFF--KSPL-----HNRLFMSVANWPI  
C. tobini1 YVLVAVYVFGATITQALFLAIHELH---NLFF--KTPV-----YNYRFSFIANLPI  
M. pusilla1 LVLAAYSLGGFATANLFLANHELH---NLVF--ENTT-----ANRALGLFANLPI  
S. asiatica1 ILI IAYFFGSFLNHNLF LAIHELH---NLAF--STPI-----YNRWLGIFANLPI  
H. impetiginosus1 ILMVAYFFGSFLNHNLF LAIHELH---NLAF--QTPV-----YNRWLGIFANLPI  
C. follicularis1 ILAISYFFGSFLNHNLF LAIHELH---NLAF--STPV-----YNRWLGIFANLPI  
T. cacao1 ILAVAYFFGSFLNHNLF LAIHELH---NLAF--STPV-----YNRWLGIFANLPI  
P. miliaceum1 LLTVAYFFGSFLNHNLF LAIHELH---NLAF--TTPS-----LNRWLGIFANLPI  
T. turgidum1 MLVVAYFFGSFLNHNLF LAIHELH---NLAF--ATPS-----LNRWLGIFANLPI  
O. sativa1 ILTVAYFFGSFLNHNLF LAIHELH---NLAF--TTPS-----YNRWLGIFANLPI  
P. trichocarpa1 MLAIAYFFGSFLNHNLF LAIHELH---NLAF--STPV-----YNRCLGIFANLPI  
A. thaliana1 ILSIAYFFGSFLNHNLF LAIHELH---NLAF--STPV-----YNRCLGIFANLPI  
N. colorata1 ILAVAYFFGSFLNHNLF LAIHELH---NLAF--STPS-----YNRWLGIFANLPI  
A. trichopoda1 IVIVAYFFGSFLNHNLF LAIHELH---NLAF--STPT-----YNRWLGIFANLPI  
S. moellendorffii1 IVLLAYFFGAFNHNLF LAIHELH---NLVF--ATPL-----LNLKILGIFANLPI  
P. patens1 VVTVAYFFGAFNHNLF LAIHELH---NLAF--STIV-----YNRLLGIFANLPI  
K. nitens1 LVFPAYAVGAWFNHNLF LAIHELH---NLAF--QTPL-----YNKLLGLFANIPI  
A. millepora1 LFLVAYTIGGVINHALLAVHEISH---NLAFGHSHAL-----HNRIFSLIANLPI  
D. melanogaster LIVAAFCFGGIVNHSMLAVHEISH---NLAFGHSRPM-----HNRILGFICNLPI  
D. pulex VIGLAYCFGGVINHSMLAVHEISH---NLAFGHARPM-----ANRILGMIANLPI  
A. pisum VMILAYCFGGVNHSMLAVHEISH---NMFGPKYPM-----YNKLLGMFANLPI  
C. virginica VFLMAYIFGGTINHSMLAVHEISH---NLAFGHGRPL-----ANRALGMIANLPI  
O. bimaculoides I IIFAYCFGGVINHSMLAVHEISH---NLAFGTKYPL-----ANRALGIFGNLPL  
E. pallida1 LIVMAYLVGAVINNGLLVALHEISH---NIVFGNSKPL-----LNRWLGIFANLPI  
C. pictabellii VFFWYAFGGCLNHSMLAVHEISH---NVAFGNKEAK-----WNRLFGFANLPI  
Bacteroidetes1 FIVTAYVVGATASHALFLAIHEITH---NLAF--KRTK-----HNNWLAFFANLPI  
W. hederaceae FLLTAYVVGATCQNLF LAIHEITH---NLVF--KSRD-----ANKALAMVANLPI  
G. cichoracearum FFLTAYVVGATANQNLFLAIHEISH---NLAF--RSTK-----ANRALAVFANLPI  
S. phingobacteriales1 IVGAAYLLGAFADHALFVMIHECAH---KLLF--KNAN-----ANRWAGMFANMPQ  
EhV201\_SLD YLLSAYFVGATLMTSFLTHEITH---NTVF--KSVL-----YNRIFAYVIQTPA  
E. huxleyi\_SLD1 LVAHAWMIGATLANSSFLVHEISH---DLVF--KAEW-----ANRVLGMVAQLPL  
E. huxleyi\_SLD5 FVVHVVTWAILQRFILGMHFAAH---RTLII--SPRMPG--AALL--NALPQLVLANFW  
C. tobini2 IVPHLLITWVVFQRFILAMHYAAH---IPLF--SKKIGFAATLL--NAIPTVMCNFY  
O. tauri1 GASYFASVYGLFLQRFALALHYGTH---ASAF--RRDR--VAGRIL--DSVAGGFLAPPF  
M. pusilla2 GAAYVATFDALYQRFILAMHYSTH---RRLI--KRRD--GLVAFF--NRVNILLAPLF  
K. nitens2 GAAYLVLSNGLFLQRFILAMHYSTH---LQIF--KSGL--PGAVL--NSLCPYLCALF  
C. reinhardtii GVAYLALNYALFLQRYMLTLHVTEH---RNLF--KKE----YGLL--NYIIPVVMCNFY  
C. roenbergensis1 GLLHVFPVVFVAARFILGLHYWSHAPRGSVW---TKGM--PFASVL--QAIPMTFIAPPF  
Synecococcus GLFYVLFNLFIHARSFIFALHYSTH---TPIF--NRK----WNFL--KHINTSILCNLF  
F. ambrosium GVLH--FLMQFSYMGTYTLMHQHIMH---RGIL--HGR----LALF--DHLFPYILDPLM  
P. roqueforti GALH--WLMGFYCGAFTLMKHQHIHM---NGVL--TPK----LYLF--DTLFPYLLDPMH  
S. phingobacteriales2 AVPYFYISQLYFKGRFGLMHCICH---RKFF--KKK----YQWL--HTYITWICPLF  
B. acetoidetes2 AAAYFILNNAIFKGFPLLMHCHTSH---RPF--KKE----YGFW--NHYPVWIGPFF  
Burkholderia GVAY--MLVWNAFGDRFTMSYHCTLH---RRLF--RRQ----YRVC--GHLLDVLCPFF



M. rosea AVAVYVTLWAWYSAPVILMLHNTMH---RPFII--KQ-----PKWL--NRVHPYVMSFFF  
\* \* \*

E. huxleyi\_SLD3 GLSVG-WWKS DH-NTHHVVCNAVEHDPNI----QHMPMLAITDKVFRPR--FWDT---Y  
C. tobini3 GLSVG-WWKS DH-NTHHVACNAIEHDPNI----QHMPMLAISPKIFSRPK--WWDT---Y  
I. galbana GISTG-WWKRSH-NTHHVVCNSVENDPDI----QHLPVFAVAAKIFDHP---YLSS---Y  
C. roenbergensis2 GISLS-WWKRSH-NVHHVVCNSIENDPDI----QHMPILAVDKEIFGS----FFST---Y  
O. tauri2 VVGIA-WWMATH-NVHHACACNSLECDPDI----QHMPVLAVTEKYFKS---VYSL---Y  
M. pusilla3 VVGIT-WWTTTH-NVHHVACNSLECDPDI----QHMPITAVTPKYFKS---VWSL---Y  
S. asiatica2 GISIA-WWKWNH-NAHHIACNSLDYDPDL----QHMPFFAVSPKLFSS----IASK---F  
H. impetiginosus2 GISIA-WWKWNH-NAHHIACNSLDYDPDL----QHMPFFAVSSKLFYS----MISY---F  
T. cacao2 GISIG-WWKWNH-NAHHIACNSLDYDPDL----QHMPFFVSSKFFHS----LTSY---F  
C. follicularis2 GISIA-WWKWNH-NAHHIACNSLDYDPDL----QHMPFLAVSSKFFAS----LTSQ---F  
P. trichocarpa2 VVGIG-WWKC NH-NAHHIACNSLDYDPDL----QHMPFFAVSSKFFSS----ITSC---F  
A. trichopoda2 GLSIA-WWKNH-NAHHIACNSLEFDPDL----QHMPFLAVSSRFFSS----LNSH---F  
N. colorata2 GISIE-WWKR NH-NAHHIACNSLDYDPDL----QHMPFLAVSSKLFQS----LTSY---F  
T. turgidum2 GLGIA-WWKF NH-NTHHISCNSLDHDPDL----QHLPLFAVSTKLFNN----LWSV---C  
B. distachyon GLGIA-WWKF NH-NTHHISCNSLDHDPDL----QHLPLFAVSTKLFNN----LWSV---C  
O. sativa2 GLSIA-WWKC NH-NTHHISCNSLDHDPDL----QHMPFLAVSSKLFQ----LWSY---F  
P. miliaceum2 GLSIA-WWKC NH-NTHHISCNSLDHDPDL----QHMPFLAVSPKLFQGN----LWSY---F  
A. leveillei GISIG-WWRWTH-TAHHIACNSLDYDPDL----QHVPFLAVSKDILSS----LTSK---F  
A. thaliana2 GISIA-WWKWTH-NAHHIACNSLDHDPDL----QHIFLFAVSTKLFNS----MISR---F  
P. patens2 GISMG-WWKR NH-NAHHIACNSIEYDPDL----QYIPLFAVSTKLFNS----LWSY---F  
S. moellendorffii2 GIGFQ-WWLR NH-NAHHFSCNLEYDPDL----QYMPFAISSRFFRSRA-LHSY---F  
K. nitens3 GIGIL-WWKR TH-NVHHIACNNVQYDPDI----QHIFLFAVSEKYFAS----LYSF---Y  
A. millepora2 VVSIG-WWKKSH-NAHHIVTNSVEFDPDI----QHLPVFAVTEKFFKS----VXSM---Y  
E. pallida2 VVSIG-WWQKSH-NAHHIVTNSIEFDPDI----QHLPLVAISEKYFKS----IYSF---Y  
N. vectusis VVSIG-WWKKSH-NAHHVVTNSVELDPDI----QHLPLVAVTDKFFNS----LXSI---Y  
E. siliculosus GIGPQ-WWIDSH-NIHHVVCNDVHCDPDI----QHLPFMAISPFFAS----LYSV---Y  
T. pseudonana GISVA-WWKATH-NVHHAVPNSVDCDPDI----AHLPVFAVHEHMFTS----LXNK---Y  
E. huxleyi\_SLD4 GISCG-MWLEEH-NLHHAYTLRPHADPQF----RYFPLWLQSVKEIPHLWLAELPSA---P  
Isochrysis GISCE-MWLCEH-NLHHAYTLRPGEDPQF----RYFPLWLQSVKEIPHLWLAELPSARTRP  
S. microadriaticum GISRS-MWNEEH-SMHHAITLRQEDPQF----NYLPLWLISKEL-----  
C. roenbergensis3 GASMG-MWNEEH-NLHHAVTMRLEDHPQF----DYLPIWLTSEREV-----  
B. floridae GMSSN-WWRDEH-WVHMLLNSVSYEDDFVDPQWEPWAQNTKLFQ-----LFQT---H  
M. pusilla4 VVGAA-WWNMEH-CEHHCVTQVVGDPDSA---GAAPVLC-----  
E. huxleyi\_SLD2 GIPYTIIPFRGYH-LEHHRFQGVGDVDTDVPSY-----FEAQHIR-----GP-----  
C. tobini1 GIPYTIIPFRGYH-LEHHRFQGVGDIDTDIPSL-----LECKIVR-----GP-----  
M. pusilla1 GIPFSVAFKRYH-MEHLFLQGHGDVDTDIPTK-----GEAAVFSV-----GGA-----  
S. asiatica1 GVPMSVTFQKYH-LEHHRFQGVGDVDMVPSL-----TETKLVK-----NI-----  
H. impetiginosus1 GVPMSVTFQKYH-LEHHRFQGVGDVDMVPSL-----TEANLVR-----NV-----  
C. follicularis1 GVPMSVTFQKYH-LEHHRFQGVGDIDMDIPTY-----TEAHLVS-----NV-----  
T. cacao1 GVPMSVTFQKYH-LEHHRFQGVGDMDMDVPSY-----TEAHLVT-----NV-----  
P. miliaceum1 GVPMSITFQKYH-LEHHRFQGVGDIDMDIPSQ-----AEAHAVK-----NA-----  
T. turgidum1 GVPMSVTFQKYH-LEHHRFQGVGDIDMDIPSQ-----TEAHVVK-----NT-----  
O. sativa1 GVPMSITFQKYH-LEHHRFQGVGDIDMDIPSQ-----AEAHAVK-----NT-----  
P. trichocarpa1 GVPMSVTFQKYH-LEHHRFQGVGDIDMDIPSR-----AETLLVT-----NV-----  
A. thaliana1 GVPMSVTFQKYH-LEHHRFQGVGDIDMDVPTY-----TEAHLVT-----NI-----  
N. colorata1 GIPMSVTFQKYH-LEHHRFQGVGDMDVPSQ-----TEARLVT-----NL-----  
A. trichopoda1 GIPMSITFQKYH-LEHHRFQGVGDLDMDIPSL-----VEAKVVQ-----NP-----  
S. moellendorffii1 GIPMSITFQKYH-LDHHNYQGIQGLDMDIPSY-----SEGRIVR-----NT-----  
P. patens1 SIPMSVTFQKYH-LEHHRFQGVGDMDMDIPSY-----TEGRIVR-----NV-----  
K. nitens1 GIPMSVTFQKYH-LEHHRFQGVGDMDVPTY-----AEGHYVT-----NT-----  
A. millepora1 GPFMAISFKKYH-LVHHRFQGVGDDELDADLPT-----FEAQMFF-----NT-----  
D. melanogaster GLPMSISFKKYH-LEHHRFQGVGDDELDADLPT-----LEARLFD-----TT-----  
D. pulex GIPFSVTFKYYH-LEHHRFQGVGDENLDADLPTS-----LEAKLFC-----TT-----  
A. pisum GLPFSVTFKYYH-LEHHRFQGVGDDELDADLPT-----VEAKLFN-----ST-----  
C. virginica GVPISVTFKYYH-LEHHRFQGVGDVKKDIPSE-----FEGKMFN-----RT-----  
O. bimaculoides GVPVSI TFKYYH-LEHHRFQGVGDIDMDIPTK-----FEAKFFN-----RT-----  
E. pallida1 GIPCSVTFKYYH-IDHHRFQGVGDDEMDPDLPT-----WEGRFFA-----NT-----  
C. pictabellii GVPYATSFKYYH-VDHHRFQGVGDGLDLDVPTA-----FEGRFFH-----SP-----  
Bacteroidetes1 VVPYAMSFKEYH-RKHHFQGVGDVADIPLR-----NEAKMFK-----GI-----  
W. hederaceae GIPFAGTFKYYH-HEHHRFQGVGDIDTDLPTN-----FELLFLK-----NL-----  
G. cichoracearum GLPYCASFRPYH-LTHHKS LGVDGLDLDLPTS-----FELLFLD-----SV-----  
S. phingobacteriales1 IFPSSVS FERYH-IKHSFQGIHELADLPRN-----WEAKMIN-----NS-----  
EhV201\_SLD IVAYHESFRFYH-TSHHLELTREGGDPDIPSV-----MEATFTRQ-----GV-----  
E. huxleyi\_SLD1 LAPMAESFRYYH-AFHHKALGVEDTDIPDTA-----WEEQLQLPG--ALGV-----  
E. huxleyi\_SLD5 GMPAG-MYYLHHVMMHHSNNLFSWDLSTNS-----  
C. tobini2 GMPAG-AYYVHHCIMHHQANNFPHDVSSTMP-----  
O. tauri1 GIPSG-VYKLHDMHMHGENSENALGRDLSSTEG-----  
M. pusilla2 GVPCG-VYLLHHIVMHHVDSNIRKDLSSSTEG-----  
K. nitens2 GLPPG-MYRLHHIYMHHCENNLFPHDLSSTEV-----  
C. reinhardtii GVPSP-FYRLHHVMMHVEDNASPGDLTSTEA-----  
C. roenbergensis1 GIPAG-MYYLHHVAMHHRDNMAPADLSTMP-----  
Synechococcus GMLPW-TYYAHHIAMHHCENNVIPHDVSSTMP-----  
F. ambrosium GHTWN-SYFYHHVKHHHIEGNG-PNDLSSTIR-----  
P. roqueforti GHTWN-SYYYHHIKHHHVEGNG-GDDLSTMY-----  
S. phingobacteriales2 GHAPG-GYSSHLLGMHHVENNM-DDDTSSTMY-----  
B. acteroidetes2 GQTPG-TYYTHHLLGMHHAENNL-PDDESCTMP-----

```

Burkholderia      GQTPG--TFYVHHMGMHHIDDNL--PRDLSSTMQ-----
M. rosea         GIPTG--YAVHHLGMHHVEDNT--PEDLSSTQR-----
                :   *   **   :

E. huxleyi_SLD3  HRKWVGMDD---AAH-WLVSHQHLLFFYPV-MALGRWNLYAQGLIYLLTQPD---K-T---
C. tobini13      HRKWVGMDD---VAR-LLVSYQHLLFFYPV-MALGRWNLYVQGLIYLLTQPD---K-T---
I. galbana       HNKVFNFGA---VER-FLVAHQHLLFFYPV-MMFARFNLYVQSWTLLSSSG---RE-V---
C. roenbergensis2 HQRQIVTDA---AAR-FLVAYQHILYFPV-MAVARFNLYIQSYLLLSFGE---R-I---
O. tauri2        HRRRMTYDR---VAR-LLVRYQHLLTFYPI-MAVARINLYLQTLIFLFLKAK---R-V---
M. pusilla3     HNRRMPFDA---AAR-WLVSKQHHTFYPI-MAVARFNLYAQSIILLLTSK---E-ITL-
S. asiatica2     YERTMKFDS---FAR-FLVASQHWTFYFPV-MCFARINLFAQSFILLLSKR---K-V---
H. impetiginosus2 YDRTMFDS---VAR-FLVSNQHWTFYFPV-MCFARINLFAQSFILLFSKR---K-V---
T. cacao2       YERKMNFDSD---VAR-FLVSYQHWTYFPV-MCFARINLFAQSFALLLSKR---K-V---
C. follicularis2 YERKLNFDSD---VSR-FLVSYQHLLTFYFPV-MCFARINLFAQSFILLLSKR---R-V---
P. trichocarpa2 YDRKLNFDSD---VSR-FLVSYQHWTYFPV-MCLARINLFAQSFILLLSKR---K-L---
A. trichopoda2  YNRKMFVDR---ISR-YLVSYQHWTYFPV-MCFARINLFAQSFILLITQK---K-V---
N. colorata2    YGRQMAFDG---LAR-FLVSYQHLLTFYFPV-MCFARINLFAQSFIVLLLSKR---K-V---
T. turgidum2    YERTLAFDA---ISK-FFVSYQHWTYFPV-MGFARINLLVQSFIVFLITQK---K-V---
B. distachyon   YERTLAFDA---ISK-FFVSYQHWTYFPV-MGFARINLLVQSAVFLVSQK---K-V---
O. sativa2      YQRTLAFDA---ASK-FLISYQHWTYFPV-MCFARINLLIQSAVFLLSR---K-V---
P. miliaceum2   YRRTLAFDA---ASK-FLISYQHWTYFPV-MCFARINLLIQSALFVLTEK---R-V---
A. leveillei    YGRKMTFDA---AAR-FLVSYQHWSFYFPV-MAVARINLFAQSFILLLSR---P-M---
A. thaliana2    YGRKLTFDV---LAR-FLISYQHWTYFPV-MCVGRINLFIQTFLLFSKR---H-V---
P. patens2      YDRVMPFDG---LAR-SLIAYQHWTYFPV-MAVARVNLVQSLVLLVLSK---H-V---
S. moellendorffii2 YDREMAFDA---IAR-LLVSYQHWTYFPV-MAVARVNLVQSFIVAIWRK---R-V---
K. nitens3      HRQMNFDV---AAR-FLVSYQHWTYFPV-MAVARVNLVQSWTLLLSR---H-T---
A. millepora2   HERILYFDQ---VAR-FFVSNQHLLYIV-MGLARFNLYVQSFLLVLSL---S-G---
E. pallida2     HQRVMQYDK---LAK-FFVTYQHLLYFLV-MGLARFNLYLQSFLLALSKE---K-V---
N. vectensis    HDRVMHFDG---LAK-FFVRYQHLLYFLI-MGLARFNLYQSFLLVLSKE---R-V---
E. siliculosus  HDKIMIYDF---LGR-CLVSVQHLLFFYPV-MCLSRFTLYVQSFIVFLVLA---R-A---
T. pseudonana   HGRVMEFDW---LARNVFPFHWFYPI-MAVARFNLYIQSALFLASKND---GH-A---
E. huxleyi_SLD4 LPRRAAWR---VVQ-CLTRVQHLLTFLPLAMIVGRYNFLAISWAYALRR-----
Isochrysis      LLRAFVWR---CVQ-LLTRVQHITIAPMAMLIGRYNFLAISWVFAFSR-----
S. microadriaticum DVAGTHVGF---LTR-MLVSVQHWTFLPVSVVIGRFNLYLISMLSALKRA---V-TAKN
C. roenbergensis3 TLGGYSLDW---LGS-VLPIQHFTFLPVSVILVGRVTFHLISFIHASKAA---L-FGHN
B. floridae     ---LQA-FLIKIQHIFIPVCMIAGRFGIIDS---K---R---
M. pusilla4     ELQTKGLPK---IGR-ALVKLQALYVPCIFIGRFNLHLISILKAPSK-----
E. huxleyi_SLD2 ---LTK-TAWACQILTYAL-----RPMFIKA---
C. tobini11     ---VTK-VVWACQILTYAL-----RPMFIKQ---
M. pusilla1     ---LLK-TVWVMGQLFFYAL-----RPMLVSP---
S. asiatica1    ---FTK-SIWWLQFFFYAL-----RPLFLKP---
H. impetiginosus1 ---VTK-SIWWVQFFFYAL-----RPVFLKP---
C. follicularis1 ---VTK-SVWVQFFFYAL-----RPLFLKP---
T. cacao1       ---VTK-AIWWVQFFFYAL-----RPVFLKP---
P. miliaceum1   ---ISK-SVWVQLQIFFYAL-----RPLFLKP---
T. turgidum1    ---VSK-SIWWVQFFFYAL-----RPLFLKP---
O. sativa1      ---LSK-SVWVQFFFYAL-----RPLFLKP---
P. trichocarpa1 ---VAK-SIWWMLQFFFYAF-----RPLFIKP---
A. thaliana1    ---FAK-TIWWVQFFFYAL-----RPIFIKP---
N. colorata1    ---FAK-SLWVQFFFYAL-----RPVFLKP---
A. trichopoda1 ---IAK-SIWWVQFFFYAF-----RPLFLNP---
S. moellendorffii1 ---ASK-IVWVQFFFYAL-----RPLFVNP---
P. patens1      ---FSK-IAWVLCQFFFYAF-----RPLFLNP---
K. nitens1      ---LSK-LVWVILQFFFYAI-----RPVFNVP---
A. millepora1   ---PTK-LVWVILQFFFYCL-----RPLFAHP---
D. melanogaster ---FGK-FLWVCLQFFFYIF-----RPLINP---
D. pulex        ---FGK-VVWVQFFFYAF-----RPLFVRP---
A. pisum        ---FGK-FIWWLQFFFYAL-----RPMFVYP---
C. virginica     ---LLK-LIWWVQFFFYAF-----RPLFIRP---
O. bimaculoides ---FTK-FLWVQPLFYTI-----RPFVIRP---
E. pallida1     ---ATK-FLYVFLIPFFYSL-----RPVFNVP---
C. pictabellii  ---PRK-ILWVFLQFFFYIL-----RPLVNP---
Bacteroidetes1 ---FGK-IWVHQIFFYAV-----RPTFKVP---
W. hederaceae   ---LTK-LFFATQILFYAI-----RPGVNP---
G. cichoracearum ---LTK-AFFATQILFYAI-----RPVLVYT---
S. phingobacteriales1 ---FFGK-AIWWLQFFFYAL-----RLSRLREI---
EhV201_SLD     ---LAK-MIWLQTNLITYLL-----RPMFVKN---
E. huxleyi_SLD1 ---GVR-LVALALNMIPLYL-----RPILLHGP---
E. huxleyi_SLD5 YRRDSPALLHYIANFALHTFLYLPYAV-----V---K---
C. tobini2      YDRSSPLHFFAYVINFMHTFLYLPFYCI-----V---K---
O. tauri1       LRRDSVLAFAAYWARFTFWSIVELPLYAV-----R---K---
M. pusilla2     YRRDSVTHWLLYWRFTVGSWVELPWYAF-----A---R---
K. nitens2      YQRDNFFHWLLYWRFWVAIWVLPYAL-----R---K---
C. reinhardtii  VPRNSLTHFVRYWTRFWLCTWVELPAYAL-----R---K---
C. roenbergensis1 YQRNSILGFLHYWARFFPALFELPIHSL-----N---A---
Synechococcus   YQRDSKLEHLKYLRYVFLIWFELPYHLI-----Q---Q---
F. ambrosium    YQRDSLLHFLHYTGRFFFIWALPYFYI-----R---K---
P. roqueforti   YNRDSIPDFLTYVGRFIFFIWLELPMYFW-----R---K---
S. phingobacteriales2 YQRDNFGDFLKYFTTFLVGVKNTILYLY-----Y---R---

```

B. acteroidetes2 FQRDSIRGFLTYFGVFLFTGIYHLSMYFV-----R----K-----  
Burkholderia YQRDSVSGFLHYLRFAALVPLELSVYLW-----R----S-----  
M. rosea YQRDSFLHFLHYFGRFFFLIIIEPLYLRL-----R----K-----

E. huxleyi\_SLD3 ---H-FRKTELAGIAVYFGVW-LGTALSMP-SWAESVGVVMSLHSHAVAGILHVQIVLSHWS  
C. tobini3 ---H-YPKTELAGIAVFFSWV-FATAWSMP-TWAQAVSWVMVSHAVAGVLHVQIVLSHWS  
I. galbana ---H-YRRIEAAALVVYATWV-AAVALSMP-TWAETVGVWILISHAVTALLHVQITVSHWA  
C. roenbergensis2 ---E-YKATEVGTLAIFSGLLVAAMYNYS-SWQEGLAYLLLSHALAGVLHVQITLSHFA  
O. tauri2 ---R-NRGMFELTLGMAAWL-SALIAQLP-S-GHRVPPFFLSHAVAGI IHVQICLSHFS  
M. pusilla3 ---K-RRTLELAVMGAYFAWL-AALVSAVP-SGWERLGFLLLSHAVGVVHVQICLSHFS  
S. asiatica2 ---A-HRTQELIGLAVFWIY-PLLVSRP-NWPERALFVVSSFSVTGIQHVQFCLNHFS  
H. impetiginosus2 ---P-HRAQELFGVLVFWIY-PLLVSYLP-NWTERLMFVFLASFVVTSIQHVQFCLNHFS  
T. cacao2 ---P-NRQOEILGLLVFWTWY-PLLVSCLP-NWGERVMFVVASFVSTGIQHIQFCLNHFS  
C. follicularis2 ---P-NRQOEMLGILVWIWF-PLLVSCLP-TWGERIMFVVTSFVSTGIQHVQFCLNHFS  
P. trichocarpa2 ---STNRGLEFLGLVFWTWY-PLLVSCLP-SWGERIFVVASFVSTGIQHVQFCLNHFS  
A. trichopoda2 ---P-KRNQELLGVLVFWLWF-PYLVVCLP-NWSEILFIICSFSVTGIQHVQFCLNHFS  
N. colorata2 ---P-NRQOEILGLVFWIY-TYLVSCLP-NWTERVIFVVCSLAVTGIQHVQFCLNHFS  
T. turgidum2 ---R-QRWLEIAGVAAFVWY-PLLVSCLP-NWVERVAFVFLSFVITGIQHVQFCLNHFS  
B. distachyon ---R-QRWLEIAGVAAFVWY-PLLVSCLP-NWVERVAFVFLSFVITGIQHVQFCLNHFS  
O. sativa2 ---P-QRGLEIAGVAAFVWY-PMVVSCLP-NWVERVAFVFLSFVITGIQHVQFCLNHFS  
P. miliaceum2 ---P-QRFLEIAGVAAFVWY-PLLVSCLP-NWVERVAFVFLSFVITGIQHVQFCLNHFS  
A. leveillei ---Q-DRYLELLGLMVFWGWY-SLLVSCLP-NWGERAMFVAVSFAVSGIQHVQFCLNHFS  
A. thaliana2 ---P-DRALNIAGILVFWTF-PLLVSLP-NWQERFIFVVFVAVTAIQHVQFCLNHFA  
P. patens2 ---P-DRWLELGAIGFFYLWF-FTLLSYLP-S-SERLVFVLSFAVTGIQHVQFCLNHFS  
S. moellendorffii2 ---P-HRGWEIGSLLFFWAWL-FSLLSYLP-SYERIAFLLIAMATTGVQHVQFCLNHFS  
K. nitens3 ---P-DKTAIEAALMVYGLW-ASLMSFIP-SWPVRIGFLCAAVALSIGILHVQICLSHFP  
A. millepora2 ---R-NKYFELFGLIFFWTWY-IYLCFLP-TWTSLFI FVVFVAVHFLAGILHVQITLSHFS  
E. pallida2 ---K-MRFELELTMFLFWTWY-LYLCYLP-TWTRTALFVFLAHFLAGI IHIQITLSHFS  
N. vectensis ---K-LRVMEFVTMFLFWTWY-LTLCYLP-TWSTRFAFVFLAHFLAGI IHIQITLSHFS  
E. siliculosus ---K-KRVHELLSYVIFFCWN-AYLCSHLQ-GAWPRASYFLVSHAVSGLHVQITLSHFS  
T. pseudonana ---G-RTTLDLMAFIFGFSWL-AVLVSCIP-SWPERIAFVVFVSHAVAGLLNVQITLSHFS  
E. huxleyi\_SLD4 ----RQWADLAAMALHVGFAGFLWALLP-GMSERLFFVAVHVAVGLVQLLSHLCL  
Isochrysis ----RKWLDVSMMAHLCWFAIWLAVLLP-STRELLFFVAVHYACVGLVHVQQLLSHLCL  
S. microadriaticum SRELCCGLLDVGMVLFWTWY-VALVCNLD-TAAERTFVFLASNWTVGLIHLIQLVLSHLA  
C. roenbergensis3 SMVRFEGAMDVAGMLVYTWY-SFVVSSLP-TAAERTAFVLCNVLCVGLHVQQLLSHLA  
B. floridiae ---E-KDLGTWAAFVHWIAT-ALLMSLP-NWEERCLFYGVAMLGEVHLHIQILISHYS  
M. pusilla4 ----GKALDVALMTGYMSYV-YGLTRLVP-E-SERWRWFMIANAVCVGLHLILNMNHYP  
E. huxleyi\_SLD2 ---QDITAMHVNTWAVQIAFD-AAMLYAFG---WRPLAYMVLCLLLAGLH---PCAGHFI  
C. tobini1 ---QEITRMHLYNWLQIAFD-AAFFAAG---WKPLFYMVFCIFLAGLH---PCAGHFI  
M. pusilla1 ---KPKMAWDCLNLTQVGF-FAFVYLAG---PRAMLYLLLSVFLGGLH---PIAGHFI  
S. asiatica1 ---KPPGIWEFVNLIQVGLD-AGMVYVWG---WKSGLYLILSTFVGGGMH---PMAGHFI  
H. impetiginosus1 ---KPPGLWEFVNLIQVGLD-VAMVYVWG---WKSGLYLILSTFVGGGMH---PMAGHFI  
C. follicularis1 ---KPPGFWEFTNFAIQIALD-AAMVYVWG---WKSFAYLILSTFVGGGMH---PMAGHFI  
T. cacao1 ---KPPGYWEFVNLIQVGLD-ATLVYVFCG---WKSFAYLILSTFVGGGMH---PMAGHFI  
P. miliaceum1 ---KPPGLWEFTNLIQVGLD-ASLVYLHG---WRSLAYLILSTFVGGGMH---PMAGHFI  
T. turgidum1 ---KPPGLWEFTNLIQVGLD-AAMVYVYG---WKSLAYLILSTFVGGGMH---PMAGHFI  
O. sativa1 ---KPPGLWEFTNLIQVGLD-ASMVYVFG---WKSLAYLILSTFVGGGMH---PMAGHFI  
P. trichocarpa1 ---KPPGYWEFINFSIQIALD-AAVVYVWG---WRSLAYLILSTFVGGGMH---PMAGHFI  
A. thaliana1 ---KPPGYWEFINFLIQVGLD-VSVVLFVFG---WRSFAYLILSTFVGGGMH---PMAGHFI  
N. colorata1 ---KPPGLWEATNLAVQIALD-AALVRFVFG---WRSLAYLILATFVGGGMH---PMAGHFI  
A. trichopoda1 ---KPPGLWEFTNLSIQVGLD-LFLVYVFCG---WKSLAYLILATFVGGGMH---PMAGHFI  
S. moellendorffii1 ---KPPGLWEALNLSAQLLFD-AALVYVAG---YKPLAFILSTFVGGGLH---PMAGHFI  
P. patens1 ---KPPGFWEVSNLLCQVAFD-ACLLYVAG---VKALAYLLLATFVGGGMH---PIAGHFI  
K. nitens1 ---KPVGVWELSNLAINVVD-LAMLYVWG---FKPIAYLLLSFLGGLH---PAAGHFI  
A. millepora1 ---QGPLEIINFLVQVTFD-ALLVHYWG---YKPLVFMIASLFLGGLH---PVAGHFI  
D. melanogaster ---KPPTRLEIINTVQVTFN-ALIVYVFLG---WKPLAYLLIGSILAMGLH---PVAGHFI  
D. pulex ---LPPSMLEIINVIQVTFD-FTVYVFLG---TKALVYLLAGSLLAMGVH---PVAGHFI  
A. pisum ---KNPTALEIISVSIQVAFN-YWVYLYFG---TKVITYMLAGSLMAMGLH---PVAGHFI  
C. virginica ---MPVTLLEVINNFVQVTFD-VIVYKYFG---IKAIFYFIQGTFLGTGLH---PLSGHFI  
O. bimaculoides ---KSLELLELINIFVQVTFD-AVVYVFLG---IKPIVYMIAGTLLATGLH---PMAGHFI  
E. pallida1 ---KKPLPLEIANAILQLAVD-GLLVHWFV---WKYLVLVASTLLGMLH---PAAGHYI  
C. pictabellii ---KPFTELEVINAVQVTFD-LIYSLWG---PKPVFYMIAGSTLAMGIH---PISGHFI  
Bacteroidetes1 ---LEFDKWMYNIIFQVAAAM-AMILPFAG---WVGLLYLLLSLLFAGGLH---PTSGHFI  
W. hederacae ---KPPTPFVLLNAAVQVAFN-AAMYKTFG---SAVFFYSVLSFFFAGSLH---PCAAHFI  
G. chioracearum ---VPFTAGHIINIAVQGLFD-YLIISYFS---ANSFYMILSSFLAGSLH---PCAGHFI  
S. pingobacteriales1 ---QNFDKWIVANVAVQVTFD-AAIWFYFMG---WPAIGYLFSLFMSVGLH---PLGARWI  
EhV201\_SLD ---LPPFSWYLLANWTVQMTFN-IGFFMMYG---IAPFLYLMLSAFLAGGIH---PLAAHFI  
E. huxleyi\_SLD1 ---PPVSGFMLLNVALQAAFD-AAFLAILG---WPGVLYTFWAILFAGGLH---PSAAHFI  
E. huxleyi\_SLD5 ---R-RFGLAGFALGSTGAYF-AAFHALHA-YHPAAFVWISLGFSSVLGPVA---LMAGNFG  
C. tobini2 ---K-RYDIAGVCAALLGTYM-LAIKFLYA-FNPLFFTCSLGIASVGLGPA---LMLGNFS  
O. tauri1 ---G-MYGTAVKCVAGVGTY-AAATCVKS-LNAMAFAFVFPVYFTSSFA---LMFGNWS  
M. pusilla2 ---R-RYALCAGVIAGLTASV-CAFLRLYM-VNPTAAIWTLAVPYVVSVA---MMLGNWS  
K. nitens2 ---R-RLRLAAHTLVMLAFAA-AVVRQLWL-FNHVATIWWVAAPMLVASLA---MMFGNWA  
C. reinhardtii ---G-RLAEAAGCAACAMGYW-ALLLALWRHVNPVATLWVLLVPPFVSTFA---LMFGNWS  
C. roenbergensis1 ---G-NYRLLAQGIASAAFFL-AKIFLLMQ-VDAIATTFVFLPFFVASLA---LMFGNWS  
Synechococcus ---K-RYKVATRCLVGLTIFL-ISIYLFQ-LRP IATLFFVFLPTTILSFA---LMEGNWK  
P. ambrosium ---G-RISLAFKAAFWELSTY-TSLYTYLR-INSRATTFVFLIPLFLLRLG---LMAGNFG  
P. roquefortii ---G-QFKYAVKCAFWEVGSY-VAIYMLYNYVNARATTFVFLIPLTVMRLG---LMVGNWG

S. phingobacterales2 ---K-RRKLYMRLTVGEYVYL-AFCIGMCF-VNLKATLVVVCIVPLIFARFV--MMLGNWT  
 B. acteroidetes2 ---R-RKKLLYRSLRGLLEFI-LMCIGLCF-INWPATVVVVFISPFILSRVV--MMLGNWA  
 Burkholderia ---R-NTKLIRQLLVGEVAFY-AAVSAAAY-WNLRATLVVVFVFPVFRMLM--MMIGNVW  
 M. rosea ---R-RYLMARRAVLGEGLGHA-VVIASALA-LDWRFLVAFAPPTFAVRFL--MMVGNWG

E. huxleyi\_SLD3 MHTYE--GRAYNG-----AD-----DEWYVTTMRTTMNVATPPWLD-WVHIGLQF  
 C. tobini3 MHAYA--GRAYTG-----PD-----DEWYITMRTTMNVSTPKWLD-FVHIGLQF  
 I. galbana METYH--GHGYND-----ET-----DEWYITQLKTTMNVATPECLD-WLHIGLQF  
 C. roenbergensis2 EQTYH--GOAYND-----ET-----DEWFHMVQVKTSLNVDCPLYMD-WFHGGLQF  
 O. tauri2 RDVFE--GRP-----EN-----DEWVKMQLSGTMDIECPWLD-WFHGGLQF  
 M. pusilla3 RNIFE--GRP-----EN-----GKVVEMQLSGTMDIDCPRYMD-WFHGGLQF  
 S. asiatica2 TSVYV--GPP-----RG-----NDWFEKQTSGLTINISCPWMD-WFHGGLQF  
 H. impetiginosus2 SKVYI--GPP-----KG-----SDWFETQTSGLTINIKCSSWMD-WFHGGLQF  
 T. cacao2 SSVYV--GPP-----SG-----NDWFEMQTAGTLDILCSSWMD-WFHGGLQF  
 C. follicularis2 SRVYV--GPP-----SG-----GDWFETQTMGTLDISCSSWMD-WFHGGLQF  
 P. trichocarpa2 SSVYV--GPP-----SG-----NNWFEKQTEGTLNISCPWMD-WFHGGLQF  
 A. trichopoda2 ASVYV--GRP-----KG-----NDWFEAQTKGSLDISCPWMD-WFHGGLQF  
 N. colorata2 SMVYV--GKP-----TA-----NDWFEVQTQGTLDIKCPPWMD-WFHGGLQF  
 T. turgidum2 SAVYV--GPP-----KG-----NDWFERQTAGTLDIKCSWMD-WFHGGLQF  
 B. distachyon SAVYV--GPP-----KG-----NDWFERQTAGTLDIKCSWMD-WFHGGLQF  
 O. sativa2 SEVYV--GPP-----KG-----NDWFEKQTAGTLDIQCSPWMD-WFHGGLQF  
 P. miliaceum2 SEVYV--GPP-----KG-----NDWFEKQTAGTLDILCSWMD-WFHGGLQF  
 A. leveillei AHTYV--GPP-----RA-----NDWFEKQTKGSIDISCSWMD-WFHGGLQF  
 A. thaliana2 ADVYT--GPP-----NG-----NDWFEKQTAGTLDISCRSYMD-WFHGGLQF  
 P. patens2 SPVYQ--GQP-----KS-----KAWVESQARGTLDLNLSTPAWMD-WFHGGLQF  
 S. moellendorffii2 SPVYQ--GRRP-----RG-----DGQWLADQATGTLNLSCKKWD-WFHGGLQF  
 K. nitens3 MPVYD--GHV-----AT-----KDYVQMQLDGTMDIDCPTWLD-WFHGGLQF  
 A. millepora2 MDTYH--GHPNEV----FKG-----SGYALLQLQTTMIECNWLD-FFHGGLQF  
 E. pallida2 METHX--GIPQES----FKN-----DKFLLSQMDTMDIECNWMD-FFHGGLQF  
 N. vectensis METYN--GLPLDA----FKE-----NRFLLSQMDTMDIECDNLD-FFHGGLQF  
 E. siliculosus MDVTE--QPQYRN----DE-----EGWVVTQLNTTLDVDCYRWMD-WFHGGLQF  
 T. pseudonana RPIFD--TNKEGP----RFG-----GDFYSRNLASLDVACPTYLD-WFHGGLQF  
 E. huxleyi\_SLD4 TQQFT--ADEE-----AA-----LGVLRFLATTRNMRTCWDA-WFHGGLM  
 Isochrysis TQQFS--ADEE-----AT-----LGVFRFLATTRNATNAWDS-WFHGGLK  
 S. microadriaticum TETFT--AEDE-----RV-----EQFFAQKTSRNIDSSWYDH-WFHGGLF  
 C. roenbergensis3 MERFT--AEDE-----QQ-----MGFFESQLRSTRNIDAPTWLDNWFHGLLEY  
 B. floridae KDMYQ--KEEL-----HE-----MEFYRYQVMQININITNPWWMD-WFHGGLNF  
 M. pusilla4 MPMLS--FPES-----QA-----LGLRFLQCVTTMNIASSSLTG-WYVGGLEW  
 E. huxleyi\_SLD2 SEHYV--FPH-----LAPKQETYSYGGPLNYLT-----WNVG--Y  
 C. tobini1 SEHYV--FPH-----KSATQETYSYGGYLNWLT-----FNVG--Y  
 M. pusilla1 SEHYV--F-----EPGQETYSYGGPLNPLV-----YNVG--Y  
 S. asiatica1 SEHYV--F-----NSEQETYSYGGPLNMLT-----WSVG--Y  
 H. impetiginosus1 SEHYV--F-----NPVQETYSYGGPLNMLT-----WSVG--Y  
 C. follicularis1 SEHYV--F-----QPEQETYSYGGPLNLLT-----WHVG--Y  
 T. cacao1 SEHYV--F-----KPDQETYSYGGPLNLLT-----WSVG--Y  
 P. miliaceum1 SEHYV--F-----SPDQETYSYGGPLNMLT-----WHVG--Y  
 T. turgidum1 SEHYV--F-----SPEQETYSYGGPLNMLT-----WHVG--Y  
 O. sativa1 SEHYV--F-----NPDQETYSYGGPLNMLT-----WHVG--Y  
 P. trichocarpa1 SEHYV--F-----KPEQETYSYGGPLNFLT-----WHVG--Y  
 A. thaliana1 SEHYV--F-----NPNQETYSYGGPLNLLT-----WSVG--Y  
 N. colorata1 SEHYV--F-----NPRQETYSYGGPLNLLT-----WHVG--Y  
 A. trichopoda1 SEHYI--F-----KPDQETYSYGGPLNLVT-----WNVG--Y  
 S. moellendorffii1 SEHYV--F-----QKQETYSYGGPLNLLT-----WNVG--Y  
 P. patens1 AEHYV--F-----LKGQETYSYGGPLNMLT-----WNVG--Y  
 K. nitens1 AEHYV--F-----LQGQETYSYGGPLNFLT-----WHVG--F  
 A. millepora1 SEHYM--F-----TKGYETYSYGGPLNWVT-----FNVG--Y  
 D. melanogaster SEHYM--F-----AKGFETYSYGGPLNWIT-----FNVG--Y  
 A. pulex SEHYM--F-----AKGFETYSYGGPLNWIT-----FNVG--Y  
 A. pisum SEHYM--F-----HKGFTYSYGGPLNFIT-----FNVG--Y  
 C. virginica SEHYM--F-----IKGQETYSYGGPLNLLT-----FNVG--Y  
 O. bimaculoides SEHYM--F-----KKGYETYSYGGCLNAIT-----FNVG--F  
 E. pallida1 AEHYM--F-----LKGQETFSYGGPLNWXT-----FNVG--Y  
 C. pictabellii AEHYM--Y-----LKGYDTFSYGGPLNWL-----FNVG--Y  
 Bacteroidetes1 SEHYV--F-----KEGQETYSYGGPLNLLT-----FNVG--H  
 W. hederaceae AEHYM--FD-----GSGQETYSYGGVNLWLC-----YNVG--Y  
 G. chioracearum AEHYL--LNGPPSGARDPRN-----KTPLPETFSYGGPLNLLT-----YNVG--L  
 S. phingobacterales1 QEHYL--TH-----SAEQETYSYGGKLNVA-----FNVG--F  
 Ehv201\_SLD TEHYN--FPG-----MPEDQETSSYGGPFNMFI-----WNAG--Y  
 E. huxleyi\_SLD1 SEHVA--VDE-----RM-----LSTGQATASSYNWLQALT-----QFNAG--C  
 E. huxleyi\_SLD5 QHQFI--NPADP-----AD-----NYGLTVNLVKAFFNMLT-----FNDG--Y  
 C. tobini2 QHIFV--DPDSP-----SS-----NYTLACNHVNAPFNMLT-----FNDG--Y  
 O. tauri1 QHIFV--DPDKP-----HC-----HYRNSYCAINHPDNQLT-----FNDG--Y  
 M. pusilla2 QHAFVKVDDGG-----RD-----DYRSSVTVLNHPDQRT-----FNDG--F  
 K. nitens2 QHLFL--DPARP-----RS-----NYALTYNLVNAADNLKT-----FNDG--Y  
 C. reinhardtii QHVIV--DPDQP-----RN-----SYRSTYNCLACPDNRRT-----YNDG--Y  
 C. roenbergensis1 QHIFV--DPDAY-----EDGAKDADAVNYSLTFNCMNSPENGMT-----FNDG--Y  
 Synechococcus QHIFV--DPDDP-----EN-----IYKSTYTCINTSTNSLN-----FNDG--Y  
 F. ambrosium QHAFV--DADEP-----DS-----DYRSSITLIDVASNRHC-----FNDG--Y



P. roqueforti QHAFV--DPADP-----NS-----DYLSSITLIDVPSNRFS-----FNDG--Y  
S. phingobacteriales2 QHSFV--DHAEP-----EN-----LYKNSINCINTVYNQTC-----WNDG--Y  
B. acteroidetes2 QHAFI--DPNDP-----GN-----SYKNSITCINTTYNHQC-----WNDG--Y  
Burkholderia QHAFI--DPDHP-----DN-----PYTSSNTTIDSRFNARV-----FNAG--Y  
M. rosea QHAFI--NTDRK-----ND-----GISNSITCINSYGNKRA-----FNDG--Y  
\*  
E. huxleyi\_SLD3 QIEHHLFPRLPRHNLRLAR--DMVRE---VVEAHFPAGSAECKRLFPPLGVAYHEP--GFFA  
C. tobini3 QVEHHLFPRLPRHNLREAR--TMVKE---VVEKHFPAGSPECKRLFPNGIAYHEP--GFFE  
I. galbana QIEHHLFPRLPRHNLKAR--ELVRA---VCAKH-----GIPYHEP--GFFE  
C. roenbergensis2 QVEHHLFPRLPRHNLDRDCR--TLVRA---LCAKH-----GITYNEL--PFFE  
O. tauri2 QVEHHLCPRVPRHKLREFRETUVKP---FAEKN-----GLQLHSV--GFWA  
M. pusilla3 QTEHHLVPRMPRHKLRRFREETLRP---WLKAH-----GLTMDAP--TFWE  
S. asiatica2 QIEHHLFPRLPRCQLRRVS--PFVKE---LCKKY-----GLPYNCA--SFWE  
H. impetiginosus2 QIEHHLFPRLPRCHLRKIS--PFVKE---LCKKH-----GLPYDSA--SFWE  
T. cacao2 QIEHHLFPRLPRCHLRKIS--PFVKE---LCKKH-----SLPYNSA--SFWK  
C. follicularis2 QIEHHLFPRLPRCQLRRIA--PLVRD---LCKKH-----NLPYNCA--SFWK  
P. trichocarpa2 QVEHHLFPRLPRCQLRRVS--PFVKE---LCKKH-----NLPYNIV--SFWK  
A. trichopoda2 QVEHHLFPRLPRWQLRQVA--PLVRA---LCKKH-----GLPYVSV--TFWE  
N. colorata2 QIEHHLFPRLPRCQLRRIA--PLVRS---LCKKH-----GLPYTSV--SFLE  
T. turgidum2 QVEHHLFPRLPRCHYRMA--PIVRD---LCKKH-----GLSYGAA--TFWE  
B. distachyon QVEHHLFPRLPRCHYRMA--PFVRD---LCKKH-----GLPYAAA--TFWE  
O. sativa2 QIEHHLFPRLPRCHLRKVS--PFVRD---LCKKH-----GLPYAAA--SFWQ  
P. miliaceum2 QIEHHLFPRLPRCHLRKVA--PYVRD---LCKKH-----ELPYSA--SFDW  
A. leveillei QVEHHLFPRLPRCHLRKIS--PFVKE---LCKKH-----NLPYVSV--SFFE  
A. thaliana2 QIEHHLFPRLPRCHLRKIS--PFVKE---LCKKH-----NLPYRSL--SWE  
P. patens2 QIEHHLFPRLPRHNLKRVK--KRVK---FCEKH-----GLPYESV--SFE  
S. moellendorffii2 QIEHHLFPQVPRHHLRAAS--EMVIKPL--LVDKH-----GLDYKMW--TFWE  
K. nitens3 QVEHHLFPRLPRHNLRRVK--GTLRA---FCKKH-----GLRYTSV--PFE  
A. millepora2 QIEHHLFPRLPRHNLRETK--SKVQE---LCKKH-----NVPYRSK--TFYE  
E. pallida2 QFEHHLFPRLPRHNLRLGTH--NEMKA---LCKKH-----GLPFRSK--SFE  
N. vectensis QFEHHLFPRLPRHNLRLSIQ--EKMKL---LCKKH-----GLPYRSK--SFD  
E. siliculosus QTLHHLFPKLPYRNLRTVQ--SRVAA---LAEKH-----GLTYHLY--PFLQ  
T. pseudonana QTLHHCYPRLRGQHLRQTE--PLIAS---LCKKH-----SLPYTSK--SFE  
E. huxleyi\_SLD4 QIEHHLFPQLPRHNLRAVA--PRVKA---LAARH-----GLAYLET--DFGE  
Isochrysis QIEHHLFPQLPRHNLRAVA--PRVKA---LATKH-----GVPYME--DFSA  
S. microadriaticum QIEHHLFPQLPRHNLKRVK--PMVQE---ICSRH-----GLPYRST--SFSQ  
C. roenbergensis3 QIEHHLFPMLPRHNLRAVA--PLVKE---ICDKH-----GITYHSS--SFPN  
B. floridae HIEHHLFPRLPRHNLRLGTH--NEMKA---LCKKH-----DVPYDIT--GFFN  
M. pusilla4 QIEHHLFPRLPRHNLKRVK--HRVKE---LCLAN-----GVPYHVAEGGFW  
E. huxleyi\_SLD2 HNEHHDFPYIPWSRLPELR--RIAPEFYDNLAVCESW-----VGVIWDYI-----  
C. tobini1 HNEHHDFPYVPSRLPELK--RIAPEFYDNLAVCESW-----VGVIWDYV-----  
M. pusilla1 HNEHHDFPKVPSRLHKLK--RIAPEFYDNLAVCESW-----TKVIFEYI-----  
S. asiatica1 HNEHHDFPRIPGSLHKLK--EIAPEFYDNLAVCESW-----SQVIYAYI-----  
H. impetiginosus1 HNEHHDFPRIPGSLHKLK--EIAPEFYDNLAVCESW-----SQVIYMYI-----  
C. follicularis1 HNEHHDFPRIPGSLHKLK--EIAPEFYDNLAVCESW-----SQVIYMYI-----  
T. cacao1 HNEHHDFPRIPGSLHKLK--EIAPEFYDNLAVCESW-----SQVIYMYV-----  
P. miliaceum1 HNEHHDFPRIPGTRHLKVK--EIAPEFYDNLAVCESW-----SQVIYMYI-----  
T. turgidum1 HNEHHDFPRIPGTRHLKVK--EIAPEFYDNLAVCESW-----SQVIYMYV-----  
O. sativa1 HNEHHDFPRIPGTRLYKVR--EIAPEFYDNLAVCESW-----SQVIYMYI-----  
P. trichocarpa1 HNEHHDFPRIPGSLHKLK--EIAPEFYDNLAVCESW-----SQVIYMYL-----  
A. thaliana1 HNEHHDFPRIPGSLHKLK--EIAPEFYDNLAVCESW-----SQVIYMYI-----  
N. colorata1 HNEHHDFPRIPGSLHKLK--EIAPEFYDNLAVCESW-----SQVIYMYL-----  
S. trichopoda1 HNEHHDFPRIPGSLHKLK--EIAPEFYDNLAVCESW-----SQVIYMYI-----  
S. moellendorffii1 HNEHHDFPRIPGSLKYLK--EIAPEFYDNLAVCESW-----IEVIYRYI-----  
P. patens1 HVEHHDFPRIPGCKLHKLK--EIAPEFYDNLAVCESW-----SVIYKYI-----  
K. nitens1 HNEHHDFPRIPGSLHKLK--EIAPEFYDNLAVCESW-----SRVIYNYI-----  
A. millepora1 HNEHHDFPSIPGSLPLVR--EIAPEFYDNLAVCESW-----TKVIYEFI-----  
D. melanogaster HNEHHDFPAVPSRLPEVK--RIAPEFYDNLAVCESW-----TRVLYDFI-----  
D. pulex HNEHHDFPSVPSRLPQVK--EIAPEFYDNLAVCESW-----VKVLYDFI-----  
A. pisum HNEHHDFPVPSGSLPQVK--EIAPEFYDNLAVCESW-----TSVLYDFI-----  
C. virginica HNEHHDFPSIPGSLPELK--EIAPEFYDNLAVCESW-----VKVIYDFI-----  
O. bimaculoides HNEHHDFPYVAGSKLPALR--KMAPEFYDNLAVCESW-----VRVIYDFI-----  
E. pallida1 HNEHHDFPSVPSRLPLIK--EIAPEFYDNLAVCESW-----IRVIYEFI-----  
C. pictabellii HNEHHDFPSIPGSLPLVK--EIAPEFYDNLAVCESW-----VCVLWDFI-----  
Bacteroidetes1 HNEHHDFPNIPGSLPLKLR--KMAPEFYDNLAVCESW-----TKVITQFL-----  
W. hederaceae HNEHHDFPAVSWLNLKPKVR--NLAPEFYDNLAVCESW-----PLVTIRFI-----  
G. cichoracearum HNEHHDFPAVPSRLPLRH--EIAPEFYDNLAVCESW-----VRVIWQFV-----  
S. phingobacteriales1 HNEHHDFPSIPWNLPLIK--KGAPEFYDNLAVCESW-----TWLFLRFL-----  
EhV201\_SLD HVEHHDFKSIPTWTRLPDLR--KTAPEFYDNLAVCESW-----VSTIYSFI-----  
E. huxleyi\_SLD1 HTEHHDLPCVPWTRLPKVR--RYAPEFYDNLAVCESW-----TGVIVRFV-----  
E. huxleyi\_SLD5 HIVHHLNSVCHWSEMPLOF-----IKNLDKYEK-----DALVFHSL--DYNE  
C. tobini2 HITHHNSVCHWSEMPLOF-----IKNLDKYEK-----GAIIFKHI--SFDE  
O. tauri1 HTIHHNSKHLWSELPEQF-----LATLDQFAKN-----DGLIFDNV--GFFD  
M. pusilla2 HALHHVNSRLHWSEFPQAF-----VEKLAHEGAN-----DAVVFSGV--HFFD  
K. nitens2 HIVHHQNSKHLWTEPLRF-----MQTLDKHAHE-----DALVFEGL--GFFD  
C. reinhardtii HILHHLNSRLHWSELPQRF-----IDTLAHDEN-----DALVFQGI--GFFD  
C. roenbergensis1 HI IHHRWASLHWADLPQKC-----IDDLAHDEN-----DALIFSDA--DPM  
Synechococcus HIEHHENPGIPWHCLPKYF-----QSRIANYAEQ-----DGIIFTNI--GSGQ

```

F. ambrosium      HTSHHLNPMRHWREHPVSF-----LTKKHIYASQ-----QALVFHDI--DYLM
P. rhodofacti    HTSHHLNPRRHRDHPVAF-----LKQKDRYAKE-----DALVFRNV--DYIF
S. phingobacterales2  HIHHLRPGMHYTEMPNEF-----LKRKDEFAEN-----KAIVFDGI--HYLH
B. acteroidetes2  HIPHHEKPAMHFSEYPLYF-----QSTVDEYAKN-----NAVVFDDGI--HYLH
Burkholderia     HIYHHVRKGTHTYSELTKEF-----AANQEKYGRE-----DAVVFDDRI--DIAQ
M. rosea         HIGHHLKATRHWTELPKDF-----VDNRERYARE-----GAIVFEGL--DFFL
: **

E. huxleyi_SLD3  GNLEMWRV---LRSAAAYAARGAKR
C. tobini3       GNLEMWRT---LKLTAALAARSACK
I. galbana       ANALTISA---LRDAALEARKAKR
C. roenbergensis2  GIQRVIDK---LHLTAKETRYLKL
O. tauri2        ANLEVFRT---LKLAAQQRWAP
M. pusilla3      ANREWVCT---LRNCAREARLSPA
S. asiatica2     ANVMTVRT---LRNAALQARDLAR
H. impetiginosus2  ANVMTIRT---LRNAAIQARDFTK
T. cacao2        ANAMTIGT---LRSAAALQARDLTN
C. follicularis2  ANAMTLET---LRTAALQARDLTN
P. trichocarpa2  ANAMTLET---LRTAALQARDLTN
A. trichopoda2   ANSMTIGT---LRAAALQARDLSN
N. colorata2     ANFLTTLKT---LRTAALQARDLTD
T. turgidum2     ANVMTWKT---LRAAALQAREATT
B. distachyon    ANVLTWKT---LRAAALQARVATT
O. sativa2       ANVLTWKT---LRAAALQARKATS
P. miliaceum2    ANVLTWKT---LRAAALQARNATS
A. leveillei     ANKMTIAT---LRNAALQARDLTN
A. thaliana2     ANVWTIRT---LKNAAIQARDATN
P. patens2       ANRMIIRT---LRTAALQARDFTK
S. moellendorffii2  ANVMIIRT---LRAAAMEARDVSK
K. nitens3       ANRLI IKC---LRQHAEARDLSK
A. millepora2    ANLEVIQR---LKETATKAKCLSP
E. pallida2     ANMEVIGK---LKETS IKSESFSH
N. vectensis    ANIEVIQC---LKDTAEKSKCFSP
E. siliculosus   ANIKTYLA---MRETARQAWTKPN
T. pseudonana    CNMEVFNT---LKDAARSACKWSP
E. huxleyi_SLD4  AVALCLRQ---LGRLEVELATVNP
Isochrysis       AMLLCAHN---LARLSIELATVNP
S. microadriaticum  ALRDVLSL---FRGLAMDIVNLKM
C. roenbergensis3  AIALCLAD---LRRLATAVVTLEM
B. floridae      AIWRTLVG---LHQAKLFLKLDPR
M. pusilla4      ANWSVMKT---LHDVARGLVI---
E. huxleyi_SLD2  -----MRDDVGPYNRVVKR
C. tobini1       -----MRPEVGFNVRVVKR
M. pusilla1      -----MDPSMGPFSSRTMR
S. asiatica1     -----MDRTVGFSSRMKR
H. impetiginosus1  -----MDRTIGPFSSRMKR
C. follicularis1  -----MDRTVGFSSRMKR
T. cacao1        -----MDRTVGFSSRMKR
P. miliaceum1    -----MDRTVGFSSRMKR
T. turgidum1     -----MDQTVGFSSRMKR
O. sativa1       -----MDQTVGFSSRMKR
P. trichocarpa1  -----MDRTVGFSSRMKR
A. thaliana1     -----MDTTVGPYSSRMKR
N. colorata1     -----ADPTVGFSSRMKR
A. trichopoda1   -----MDRMVGPYSSRMKR
S. moellendorffiii  -----TDPTIGPFCRTIR
P. patens1       -----TDATVGFSSRMMR
K. nitens1       -----TDPTVGFSSRVMR
A. millepora1    -----MDPAIGPYARIKR
D. melanogaster  -----MDPAVGPYARVVKR
D. pulex         -----TDPAIGPYARVVKR
A. pisum         -----MDPNIGPYARIKR
C. virginica     -----MDPEIGPYSRVRR
O. bimaculoides  -----FDPDIGPYSRIKR
E. pallida1     -----TDPNIGPYARIKH
C. pictabellii   -----FCDSLGPFAVVKR
Bacteroidetes1  -----FRKDISLFNRIKR
W. hederaceae    -----LDKEVGLFSRAKR
G. cichoracearum  -----LDKNVGLNCRVVKR
S. phingobacterales1  -----FDREISLFNRIKL
EhV201_SLD       -----TDARINGFCRVRR
E. huxleyi_SLD1  -----L----GHCRVVKR
E. huxleyi_SLD5  MSALIYTRQ--LRKLASYCVQLRA
C. tobini2       ISFAVFSGERGLRRLAKHVQITP
O. tauri1        VGLAVMCGR--LHWLADRYVNVGQ
M. pusilla2      VGVNLFGR--YGHADRYVNVGQ
K. nitens2       VGFAMTGTQ--LHKLADRYVDIGP
C. reinhardtii   VGVMTFTGQ--LGKLAGHIVPCGP
C. roenbergensis1  IGLAVMSGN--WDVVSRVYHYGQ

```



|                       |                          |
|-----------------------|--------------------------|
| Synechococcus         | VGRLVLNGQ--LEQLADRYLNVGQ |
| F. ambrosium          | VTVRLLMKD--YKRLAECLVPIGS |
| P. roqueforti         | ITVNLLRKN--YDYLAKCLIPIGD |
| S. phingobacteriales2 | IFTWLMKK--YDKLADNLVNING  |
| B. acteroidetes2      | VFFYLMIKR--YDLLARHFVNIGN |
| Burkholderia          | IWLLLVTRQ--HRKLATHFVRLPG |
| M. rosea              | VSVLLWTGQ--WKVLAKRYVRLDG |

**Figure S36: Multiple amino acid sequence alignment of the conserved domain of SLDs.** As the subfamilies differ strongly even within the domain, Mafft using the L-INS-i algorithm gave the best alignment (see Methods). Details of the sequences are listed in Table S5. Consensus symbols are as follows: asterisk (\*) indicates fully conserved residues, (:) indicates conservation between groups of strongly similar properties, and (.) indicates conservation between groups of weakly similar properties.

CLUSTAL 2.1 multiple sequence alignment

```
E. huxleyi_SBH1          FAVHVVTIDVWFYVTHRHLPL-LYKWIHKFHAFKAPAAIACVYANPIEFVGNVGGV
C. tobini1              FAIHGIVIDVWLYGTHRLIHHPI-LYMWIHKFHHRFKAPTAVACVYANPLEFMIGNVGGV
F. proliferatum         FAICLVAREVLFYYSHRLLFHIPY-LYRRVHKIHHKFTAPVAFASQYAHPEHIVANTPIPI
S. indic1              FAIALIIREALFYHLRHLFAKR-LYPYIHKIHHRFAPVALAAQYAHPEHILVNVLPV
A. candidus1           IVLCLLMREVMFYYSHRLLHTPR-FYAPIHKQHHRFVAPIALAAQYAHPEHIVANVLPV
E. huxleyi_SBH2        LLAHLLVNEVLFYAHWALHQP-LYRRIHKIHHEFTAPFALAAVHAHPLELLTADLVFP
C. tobini2             LVAHLLVNEVLFYVHWALHKG-LYKRIHKIHHEFTAPFALAAVHAHPLELLIADLVFP
P. marinus1            MIYFILVNEFLFFYGHWLFHASPFLYKKIHKVHHEYPAPNAFASLYCHPLELLIADFIPL
P. marinus2            MIYFILVNEFLFFYGHWLFHASPFLYKKIHKVHHEYPAPNAFASLYCHPLELLIADFIPL
P. olseni              MIYFILVNEFLFFYGHWLFHASPFLYKKIHKMHEYPAPNVFASLYCHPLELLIADFVPL
S. microadriaticum     IGFGVIVNEVLFYGHWLMHANKFLYRHIHKIHHEFKAPMGLAAIYCHPLEFFVSDMLPL
E. huxleyi_SBH4        LASVIIGNEILFFYSHWALHTKT-LYARIHKKHHEFTSPIALVAIYCHPIEFVLSDIVPL
E. huxleyi_SBH5        LASVIIGNEILFFYSHWALHTKT-LYARIHKKHHEFTSPIALVAIYCHPIEFVLSDIVPL
EhV201_SBH            LLSVILTNEVLFYYSHRLLHHPK-LYAKFKHKKHHEFISPVGAVAIYCTQIEFLVSDLLPL
Deltaproteobacteria    IIVAILCNEVTFYGHRLLENKWKLYKNVHKIHHENTAPVALVAAYCHPEMIVSNLAPL
H. fermentalgiana      LVIFLLVDEVLFFYTHRACHEFPFLYKHKVHKIHHQYTAPIGLAADYCHPLEHFLVNLIPN
E. affinis             ILGFVAVDEILFYAAHRAAHSRP-LYKYVHKVHHEYTAPIALATDYCHPLEHCFVNVLPN
T. trahens2           LAFCALEEILFYGHRLHHPK-LYKAIHKQHHEFIAPIALAANYAHPIEVLLSNVLP
A. castellanii2       LLIFLAVEEVLFYYSHRLLHWN--YQRIHKIHHEFRAPISIASAYAHPEVYVSNMLPL
H. sapiens2           LAIFTLIEEVLFYYSHRLLHHTP-FYKKIHKKHHEWTAPIGVISLVAHPIEHAVSNMLPV
Archaeon1             LVVYVLEEILFYSGRLLHHPM-FYAPIHKFHHTYTAPFGIAAVYAHPIEHMNSVLPV
S. rosetta1          LAVSLVVEDTLFYWGHRLHHP-SIYKHIHKQHGFHACVGAALYAHPIEEVVFIP
Archaeon2             FLVSVINDTLFYWGHRLHHP-SIYKHIHKQHGFHACVGAALYAHPIEEVVFIP
A. castellanii1       LLVHILVQDTIFYWTHRLHHP-FLYKRIHKQHGFYTPVGIASEYAHPAEDFLT-QVAF
T. trahens1           IAVAVAVNETLFYFAHRTLHTK-ALYKAIHKQHRYHAAVGIASEFAHPVEDLLANAIP
E. huxleyi_SBH3       LAFATAVDDTMFYWAHRLHHP-CVYKHIHKQHHEFKQPVGLATEYAHPLEEACN-TLAT
P. tetraurelia1       IVFSMLIEDTCFYWTHRLHSP-KLYSIHKKHHEFYTSVSYAAIYTHPIEYVGNVIVP
A. queenslandica      IPLCVIVEDTLFYWHRLHHP-FLYKHLKMHQFHQPITALSFQYTHPIENFMTAGIPL
P. tetraurelia2       FLFCIIIEDVGFYWHRLHHP-SLY-KYHKQHGYSVTISISAEYSTAIEYLLSNLLPF
O. tauri              IPVFFVIEDFYFYWIHRFLHKK-RVYKYVHKVHHEHKYPPFGIAAEYAHPEVETFFL-GIGT
M. commoda            LPAFFVIEDFYFYWHRLHHP-SVYKYVHKIHHEHTHPFGIAAEYAHPEVETFFL-GIGT
D. purpureum         IICSFIIEDFYFYWHRLHHP-IWYKYIHKVHHDHASPFGITAEYAHPLETLIL-GAGT
H. sapiens1          CFGCAVIEDTWHYFHLRLLHKK-RIYKYIHKVHHEFQAPFGMAEYAHPLETLIL-GTGF
A. candidus2         IAVFFVLEDTWHYFHLRLLHWG-PLYKAIHKIHHQYSAPFGMAEYASPIEVMIL-GFGT
S. indica2           VAGFFVLEDYFYFYWHRLHHP-PLYRNIHKLHKKYSAPFGMAEYAHPLETLIL-ALGT
P. umbilicalis       VALCFLLEDYFYFYWHRLHHP-ALYAAVHAVHHEHAAPFGMAEYAHPEVFLVLT-GTST
C. merolae           ILFCFLVEDMCFYWGHRLHHP-WLYRYIHAIIHHQYTAPEGAVAEFAHPIEVIFL-GMST
E. huxleyi_SBH7       ALAWFVLHDLDFYCYHRTLHEVPWLYASVHKPHHKFTAPFAWTSHAVHPAEMALQ-AAGA
E. huxleyi_SBH6       VAWQMLVHDAIFYFYWHRLHHP-AFYR-WHKDHSVVGVSALAAEYASDAESFLGHNLVP
A. muludensis        ILLSIILODIFYFYHARLHHP-RIYKHIHKKHHEFTPIALAALYAHPEVYFVLSNLPV
M. brevicollis       MAISLLLNDVAFYWAHRLHHP-KLYARFHKQHHEYKGPVGFAAEYAGTLEQFLSNQLPV
S. rosetta2          FGSVVLNDALFYWTHRLHHP-QLYARFHKQHHEYKATTFGAEEYASPLEQLLSNQLPV
:                       : * * * * *
E. huxleyi_SBH1          VLGPALTR-----CHPYAAAYWLAFALTSTSLAHSGYRAG-----A
C. tobini1              VLGPALTN-----CHPYAAAFWMAYAITSTSFHSGYTVFG-----A
F. proliferatum         VLPPIILR-----THILTMWAFVAVQLIETATVHSGDFDFGG-----AA
S. indic1              VLPNALLR-----SHILTFWAFLAAMLIETSTVHSGYDFWPH-----LA
A. candidus1           SLPGQILH-----SHILTFWAFVALELVETATVHSGDFDFGG-----RA
E. huxleyi_SBH2        TAGFVLFV-----PHIFVFMWIIAGCLGTQTHHSGYRPLWIAAFDE-----QP
C. tobini2             TAGFVVFR-----PHIFVFMWIIAGCLGTQTHHSGYRPLWIAAFDE-----QP
P. marinus1            GAGAFFLG-----SHCSTFLLWSIYAVLGTGEGHSGIRWPWIMWFDH-----QP
P. marinus2            GAGAFFLG-----SHCSTFLLWSIYAVLGTGEGHSGIRWPWIMWFDH-----QP
P. olseni              GAGAFFLG-----SHCSTFLLWSIYAVLGTGEGHSGIRWPWIMWFDH-----QP
S. microadriaticum     GAGLAAIR-----TNAFTGVVWMAFVMAATQTHHCGIRWPWIDFFSFAE-----AQP
E. huxleyi_SBH4        GAGLIVAH-----AHVFFALMWIVTAVIGTQVHSGFRPLPWHFPGDE-----QP
E. huxleyi_SBH5        GAGLIVAH-----AHVFFALMWIVTAVIGTQVHSGFRPLPWHFNPDE-----QP
EhV201_SBH            VGGLFFPYA-----AHAFALTWIIAANIATQVHSGMHMPYALGIDE-----QP
Deltaproteobacteria    TISFPLVG-----GHLFTMFVVICFALGTQYHSGYKMPWSVHFDK-----HP
H. fermentalgiana      LAGALLVR-----AHAVTFIFW--MWVLS-QS-----ED-----NP
E. affinis             IG-YIVCG-----PHAYSILIWLLSYLSSQTNHSGYRFPPTDLTREP-----QP
T. trahens2           MAGPVLIG-----AHIVTMWTFIAIIVGTLTHHCGYRFPWHPFLFDH-----QP
A. castellanii2       LAGPLLMG-----SHLATVWVWTAIAVGTSTNHHCYALPWLRLG-----SSP
H. sapiens2           IVGPLVMG-----SHLSSITMWFSLALITTIHSHCGYHLPFLP-----SP
Archaeon1             SAGPVLVQ-----SHPIVPMVGVVLALEFNTMNVHSGYDFTHLLIF-----PSP
S. rosetta1           YSGCLISGC-----PLSVMVLWSFLR---LWETVDAHSGYAFDW---SPWNFLFT-IQGGA
Archaeon2             IGGCLFMGS-----HVVTLWLWFLR---VIETVDTHSGYSWPF---DPFHLPFS-IQGGA
A. castellanii1       IAGPLIMGS-----HIFTLYLWLLLR---LWETVDAHSGYALPFLPSPFLS---GVA
T. trahens1           LAGMLLVGP-----HLATLTLWLALR---VLETVDAHSGYAFPW---SPHFHM---DVA
E. huxleyi_SBH3       ALGPLLLGS-----HVAVSVGYMGLK---LWQSIDAHSGMLLPVLPSPWNLLPG---MDCA
P. tetraurelia1       FIGQKILGNK---MHIAATLQLWLLFR---IGETIDGHSYEFWS---SPYRLLP---FSSSA
A. queenslandica      FAGPPLLGS-----HVYTVWLWMCVR---ITESMDGHSYDLWF---MPFRYFP---FRPGA
P. tetraurelia2       IIGPRLGKEK---LHLVTLIWIIGIR---VYKTLAHSYAFPW---EIFQYIP---FLAFS
O. tauri              LLGPLFFAK-----HMVTLVWVLFVR---LLETVEDHSGYDVPWNPTNL---IP---FWGGA
M. commoda            LLGPLFFAK-----HMVTLVWVLFVR---LLETVEDHSGYDVPWNPTNL---IP---FWGGA
D. purpureum          VIGPFIISR-----DLFTLWVWLGTR---LYQTVCHSGYDFPWSITNL---IP---FWGGA
H. sapiens1           FIGIVLLCD-----HVILLWAVVTIR---LLETIDVHSGYDIPNLPLNL---IP---FYAGS
```

```

A. candidus2          VGCPILWCAITGDLHIFTMYVWIVLR---LFQAVDSHSGYEFWPSLHHF--LP--FWAGA
S. indica2           LGGPILWTMYSGNFHIVTMYVWVTLR---LFQAVDAHSGYDFPWSLQHI--LP--FWSGA
P. umbilicalis       IVGPALLGP-----HLLTLYVYLALR---CMQTVECHSGYEFWPSLNVW--VP--WYGGA
C. merolae           VAGPLIIGP-----HLLTLWGYLMVR---CWQTVDCCHSGYDLPWSLNRW--FP--LYGGA
E. huxleyi_SBH7      MAGPLLWVRLYG-LPVRAWWCWLALV---QAQGVMDHSGYDLPAPLDCFGMLP--GFGGT
E. huxleyi_SBH6      FVPAMLLSL---LGDCVSFAAFLSWISVRLIHSYAIHSGYELP-WLVGALMMQS--SGAD
A. muludensis        ALPPALLG-----AHIVTFWFMLTWA---LVLAI IAHCGYELP-PIYGNWMEV-----
M. brevicollis       VLGPLLVG M-----HCSTWWLYLTWR---LWRTYEIHSGLMLQNTWLGRLGLL--HGGA
S. rosetta2          VVGPLLCRM-----TTEWLVLVWVR---LWRTYEDHSGYDFHNTFLGRLGLS--HGYS

E. huxleyi_SBH1      EEHDTHEEHFSSWNFG-VGILMDRAL-GT
C. tobini1           TSHDQHHEHFDFNFG-V-LITDAVL-GT
F. proliferatum      YRHDRHHERFDVHFG-G-MPWLDWLHST
S. indica1           EKHDRHHEVF IWNFG-ACLDWDFWMHGT
A. candidus1         KMHDSHHEKFNLNFG-V-LGLLDWAHGT
E. huxleyi_SBH2      DFHDFHHQRFSCCYG-N-IGWLDLHGT
C. tobini2           DFHDFHHGKFNCCYG-N-IGWLDAMHGT
P. marinus1          DFHDFHHQKFNVNFG-N-IGFLDKIHGT
P. marinus2          DFHDFHHQKFNVNFG-N-IGFLDRIHGT
P. olseni            DFHDFHHEKFNVNFG-N-IGFLDKMHGT
S. microadriaticum  NYHDFHHEKFNVNFG-A-MGWLDDLISK
E. huxleyi_SBH4      DFHDFHHQKFTCNFG-H-LGILDALHGT
E. huxleyi_SBH5      DFHDFHHEKFKCNFG-H-LGILDVHGT
EhV201_SBH          TYHDLHKKHFNYNYG-A-IGILDKIHGT
Deltaproteobacteria AYHDYHHEIFTSNYG-V-LGWLDAHGT
H. fermentalgiana   NMHDLHMKFTCNFG-S-MGILDKLHGT
E. affinis           DFHDKHHERFDCNFG-T-NGVLDWLFST
T. trahens2          NFHDTHHERFLCNFG-L-LGILDWLHGT
A. castellanii2      RFHDHHLHSFNTNFG-L-VGLLDLHGT
H. sapiens2          EFHDYHHLKFNQCYG-V-LGVLDDLHGT
Archaeon1            YFHDWHHEKFNENFG-V-GLGLDYMLGT
S. rosetta1          ERHDFHHFQNKGSYG-SFTKFDWVCGT
Archaeon2            ERHDFHSHNLGCGY-SFTIFWDHIMGT
A. castellanii1     DQHDYHHSQNKGSYG-SFFGLWDWICGT
T. trahens1         GKHDFHSHNVGFCG-TFFSVDFMIFHT
E. huxleyi_SBH3      AAHDFHSHNVGNFG-GFFTFWDRVCGT
P. tetraurelia1     ESHNYHSHNVGNFG-SFFVFDTIMGS
A. queenslandica    QVHDYHSHNVGNFG-SFFTLWDKLCGT
P. tetraurelia2     EFHSYHSHNDGNFG-SFFVFDYLFGT
O. tauri             VHHDFHHTFEGPYS-SVFTWCDWMFGT
M. commoda          VHHDFHHTFQGPYS-SIFTWCDWAFGT
D. purpureum        HFHDFHHTFVGNYS-STFTYLDKVFGT
H. sapiens1         RHDFHMMNFIGNYA-STFTWWDRIFGT
A. candidus2        DHDHLHEKFFVGNYS-SSFRWWDYLLNT
S. indica2          DHDHFHMAFTNNYS-TSFRWWDHLFGT
P. umbilicalis      EYHDWHHKTYFGNYA-STFTWWDVYGT
C. merolae          RQHDHHTKTYSGNYA-SMFIHMDWLFGT
E. huxleyi_SBH7     RFHDDHRYFTGNYA-AALSLIDDLMGT
E. huxleyi_SBH6     AHHENHHTKNNGNFG--DSPLWDILMGT
A. muludensis       --HDMHHELFFVGNFG--TIGICDVLGT
M. brevicollis      VYHDFHHTNNHGNFGGPPANALWDVLGGT
S. rosetta2         IYHDFHSHNLGNFGPPANAFWDHIGGT
          * . **          : .          .

```

**Figure S37: Multiple amino acid sequence alignment of the conserved domain of SBHs.** ClustalW alignment of the domain is shown. Details of the sequences are listed in Table S6. Consensus symbols are as follows: asterisk (\*) indicates fully conserved residues, (:) indicates conservation between groups of strongly similar properties, and (.) indicates conservation between groups of weakly similar properties.

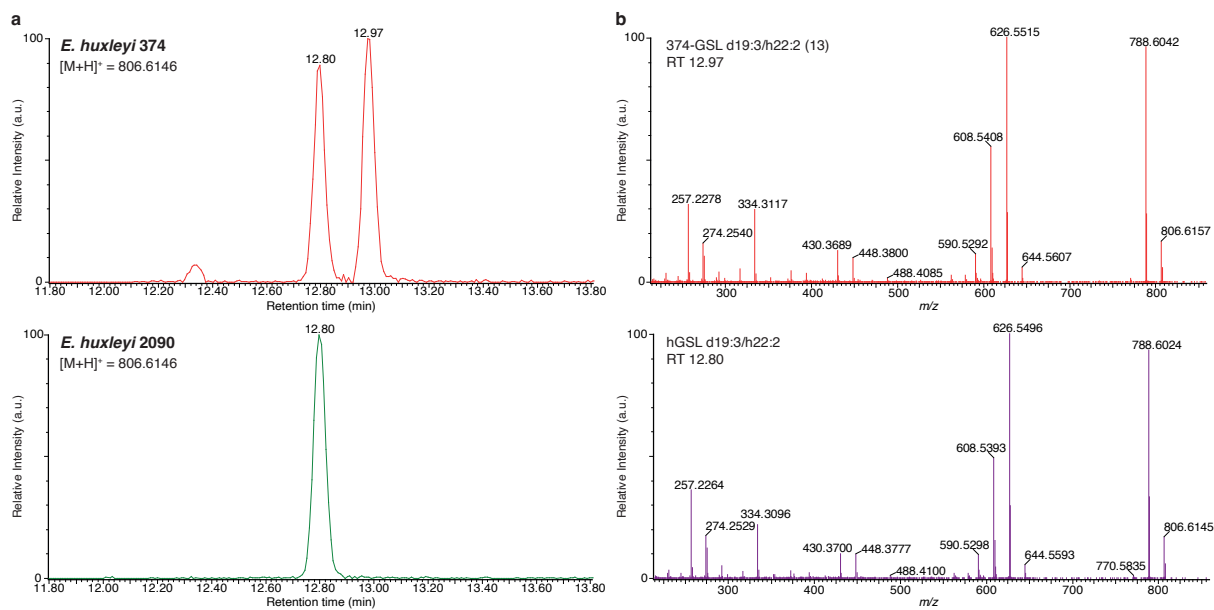

**Figure S38: LC-MS/MS analysis of 374-GSL d19:3/h22:2 (13) and hGSL d19:3/h22:2.** (a) Extracted ion chromatogram (EIC) of  $m/z$  806.6146 in *E. huxleyi* strains 374 (top) and 2090 (bottom). hGSL d19:3/h22:2 appears in both strains (RT 12.80 min), while 374-GSL d19:3/h22:2 (13) appears only in *E. huxleyi* strain 374 (RT 12.97 min). (b) LC-MS/MS spectra of both GSLs show similar fragmentation, suggesting that they are structural isomers, either in the LCB, FA or sugar headgroup.

### GSL d19:3/h22:2 (hGSL)

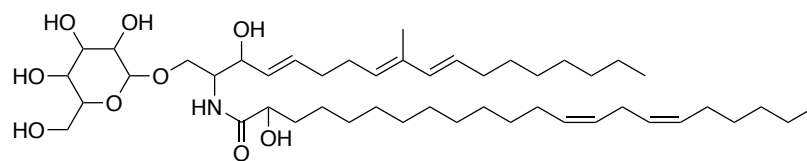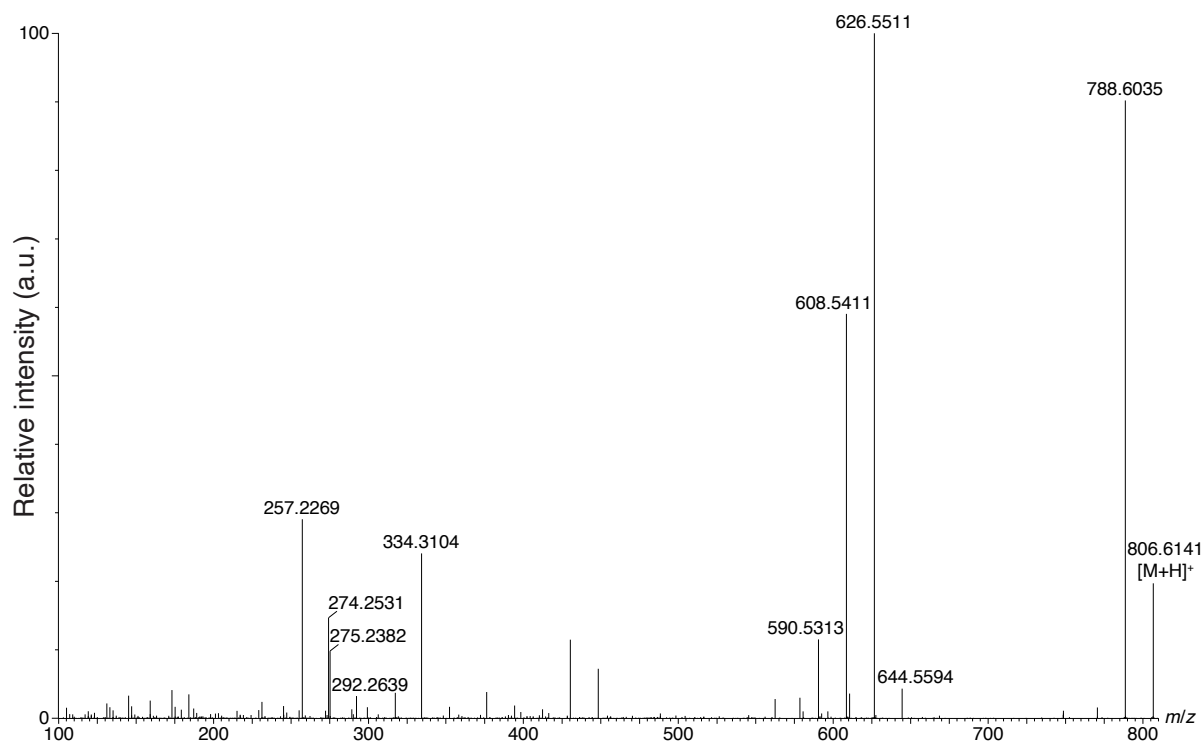

| Observed $m/z$ | Predicted ion                        | Chemical formula     | Theoretical $m/z$ | Mass error (ppm) |
|----------------|--------------------------------------|----------------------|-------------------|------------------|
| 806.6141       | $[M+H]^+$                            | $C_{47}H_{84}NO_9^+$ | 806.6146          | -0.6             |
| 788.6035       | $[M+H-H_2O]^+$                       | $C_{47}H_{82}NO_8^+$ | 776.6040          | -0.6             |
| 644.5594       | $[M+H-(Hexose-H_2O)]^+$              | $C_{41}H_{74}NO_4^+$ | 644.5618          | -3.7             |
| 626.5511       | $[M+H-Hexose]^+$                     | $C_{41}H_{72}NO_3^+$ | 626.5512          | -0.2             |
| 608.5411       | $[M+H-Hexose-H_2O]^+$                | $C_{41}H_{70}NO_2^+$ | 608.5407          | 0.7              |
| 590.5313       | $[M+H-Hexose-2 \cdot H_2O]^+$        | $C_{41}H_{68}NO^+$   | 590.5301          | 2.0              |
| 292.2639       | $[LCB\ d19:3+H-H_2O]^+$              | $C_{19}H_{34}NO^+$   | 292.2640          | -0.3             |
| 274.2531       | $[LCB\ d19:3+H-2 \cdot H_2O]^+$      | $C_{19}H_{32}N^+$    | 274.2535          | -1.5             |
| 275.2382       | $[LCB\ d19:3+H-NH_3-H_2O]^+$         | $C_{19}H_{31}O^+$    | 275.2375          | 2.5              |
| 257.2269       | $[LCB\ d19:3+H-NH_3-2 \cdot H_2O]^+$ | $C_{19}H_{29}^+$     | 257.2269          | 0.0              |
| 334.3104       | $[Amino\ FA\ h22:2+H-H_2O]^+$        | $C_{22}H_{40}NO^+$   | 334.3110          | -1.8             |

**Figure S39: LC-MS/MS analysis of hGSL d19:3/h22:2.** A putative structure is presented, as reported previously<sup>6</sup>. The structure is supported by a list of fragments detected in MS/MS mode (Metabolomics Standards Initiative level 2 annotation<sup>2</sup>). Fragments were detected in positive ionization MS/MS mode using  $[M+H]^+ = 806.6146$  as the precursor ion (Table S3).

### GSL d18:2/c22:0 (sGSL)

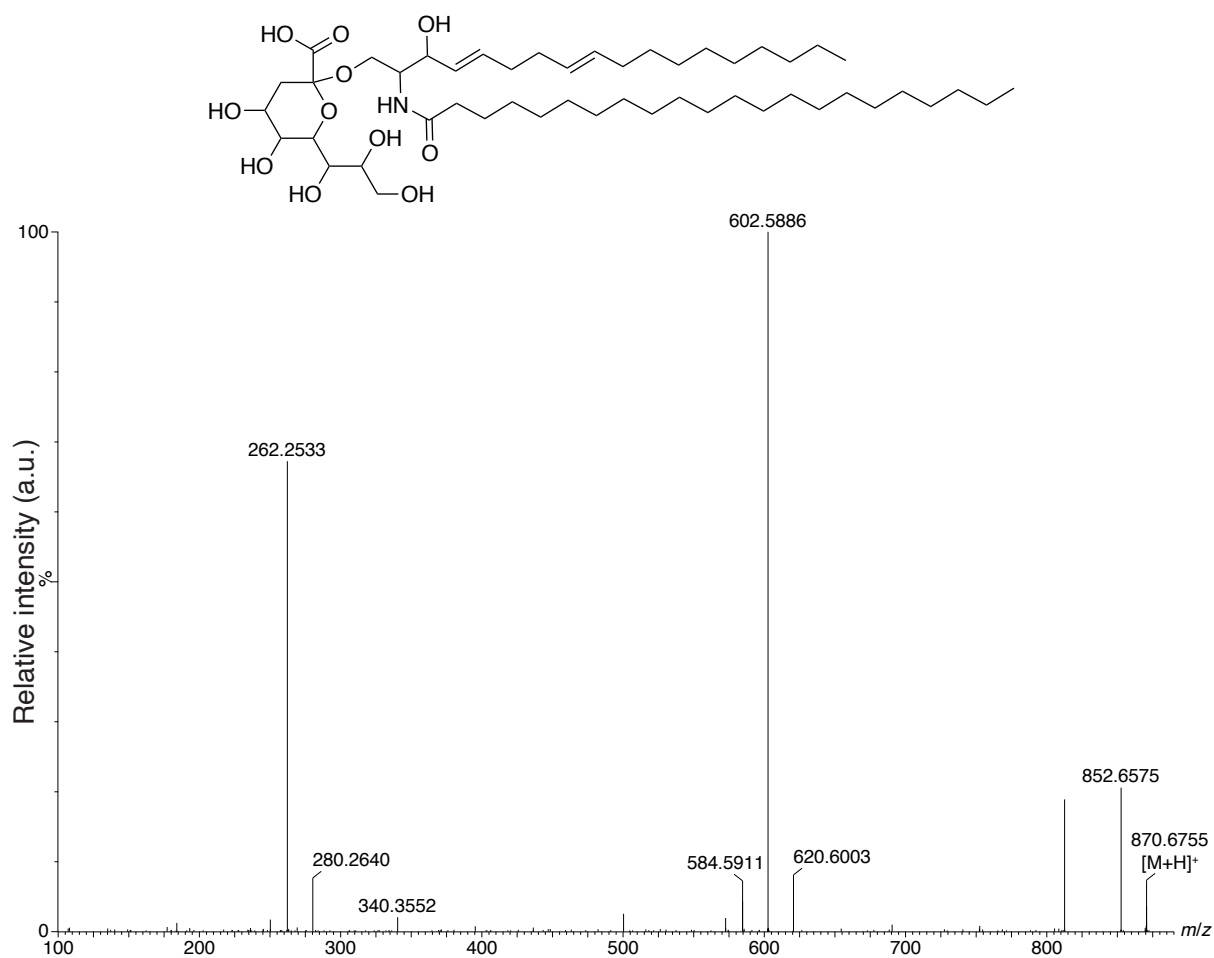

| Observed <i>m/z</i> | Predicted ion                                         | Chemical formula                                              | Theoretical <i>m/z</i> | Mass error (ppm) |
|---------------------|-------------------------------------------------------|---------------------------------------------------------------|------------------------|------------------|
| 870.6755            | [M+H] <sup>+</sup>                                    | C <sub>49</sub> H <sub>92</sub> NO <sub>11</sub> <sup>+</sup> | 870.6670               | 9.8              |
| 852.6575            | [M+H-H <sub>2</sub> O] <sup>+</sup>                   | C <sub>49</sub> H <sub>90</sub> NO <sub>10</sub> <sup>+</sup> | 852.6565               | 1.2              |
| 620.6003            | [M+H-(Sialic acid-H)] <sup>+</sup>                    | C <sub>40</sub> H <sub>78</sub> NO <sub>3</sub> <sup>+</sup>  | 620.5982               | 3.4              |
| 602.5886            | [M+H-(Sialic acid-H)-H <sub>2</sub> O] <sup>+</sup>   | C <sub>40</sub> H <sub>76</sub> NO <sub>2</sub> <sup>+</sup>  | 602.5876               | 1.7              |
| 584.5911            | [M+H-(Sialic acid-H)-2·H <sub>2</sub> O] <sup>+</sup> | C <sub>40</sub> H <sub>74</sub> NO <sup>+</sup>               | 584.5770               | 24.1             |
| 280.2640            | [LCB d18:2+H-H <sub>2</sub> O] <sup>+</sup>           | C <sub>18</sub> H <sub>34</sub> NO <sup>+</sup>               | 280.2640               | 0.0              |
| 262.2533            | [LCB d18:2+H-2·H <sub>2</sub> O] <sup>+</sup>         | C <sub>18</sub> H <sub>32</sub> N <sup>+</sup>                | 262.2535               | -0.8             |
| 340.3552            | [Amino FA c22:0+H] <sup>+</sup>                       | C <sub>22</sub> H <sub>46</sub> NO <sup>+</sup>               | 340.3579               | -7.9             |

**Figure S40: LC-MS/MS analysis of sGSL d18:2/c22:0.** A putative structure is presented, as reported previously<sup>7</sup>. The structure is supported by a list of fragments detected in MS/MS mode (Metabolomics Standards Initiative level 2 annotation<sup>2</sup>). Fragments were detected in positive ionization MS/MS mode using [M+H]<sup>+</sup> = 870.6670 as the precursor ion (Table S3).

### GSL t17:0/h22:0 (vGSL)

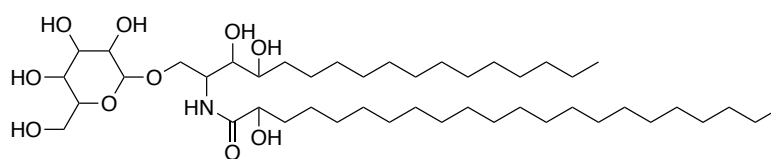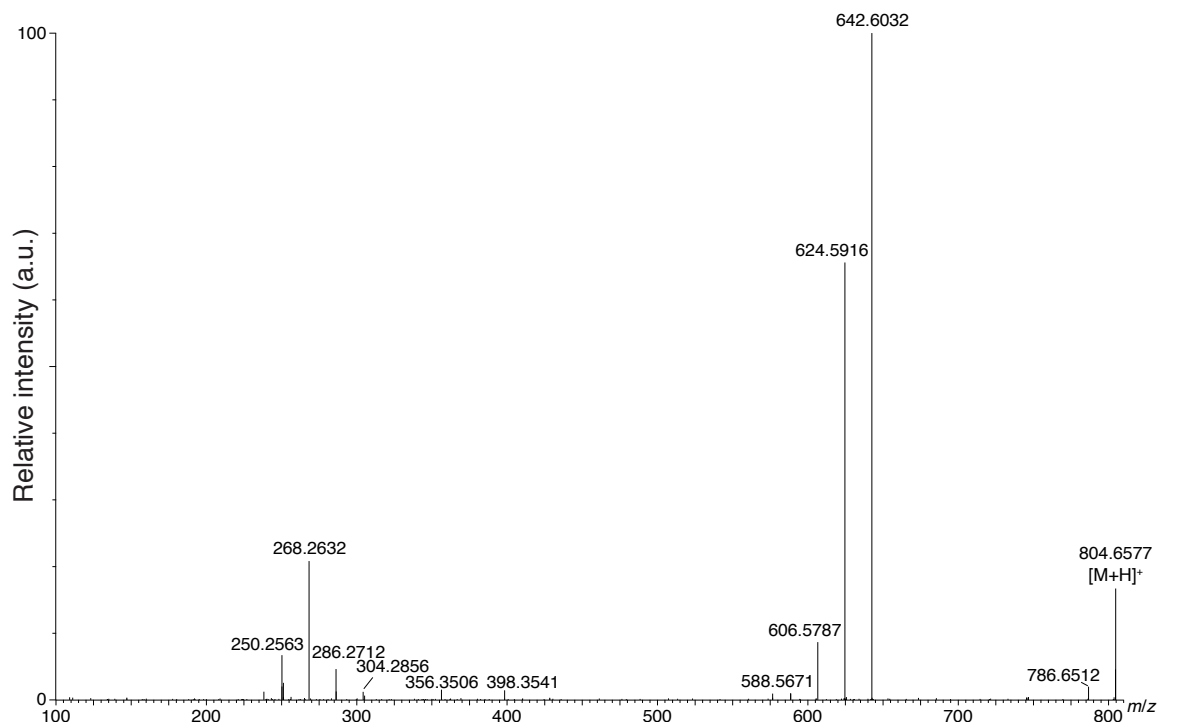

| Observed <i>m/z</i> | Predicted ion                                                   | Chemical formula                                              | Theoretical <i>m/z</i> | Mass error (ppm) |
|---------------------|-----------------------------------------------------------------|---------------------------------------------------------------|------------------------|------------------|
| 804.6577            | [M+H] <sup>+</sup>                                              | C <sub>45</sub> H <sub>90</sub> NO <sub>10</sub> <sup>+</sup> | 804.6565               | 1.5              |
| 786.6512            | [M+H-H <sub>2</sub> O] <sup>+</sup>                             | C <sub>45</sub> H <sub>88</sub> NO <sub>9</sub> <sup>+</sup>  | 786.6459               | 6.7              |
| 642.6032            | [M+H-(Hexose-H <sub>2</sub> O)] <sup>+</sup>                    | C <sub>39</sub> H <sub>80</sub> NO <sub>5</sub> <sup>+</sup>  | 642.6037               | -0.8             |
| 624.5916            | [M+H-Hexose] <sup>+</sup>                                       | C <sub>39</sub> H <sub>78</sub> NO <sub>4</sub> <sup>+</sup>  | 624.5931               | -2.4             |
| 606.5787            | [M+H-Hexose-H <sub>2</sub> O] <sup>+</sup>                      | C <sub>39</sub> H <sub>76</sub> NO <sub>3</sub> <sup>+</sup>  | 606.5825               | -6.3             |
| 588.5671            | [M+H-Hexose-2·H <sub>2</sub> O] <sup>+</sup>                    | C <sub>39</sub> H <sub>74</sub> NO <sub>2</sub> <sup>+</sup>  | 588.5720               | -8.3             |
| 304.2856            | [LCB t17:0+H] <sup>+</sup>                                      | C <sub>17</sub> H <sub>38</sub> NO <sub>3</sub> <sup>+</sup>  | 304.2852               | 1.3              |
| 286.2712            | [LCB t17:0+H-H <sub>2</sub> O] <sup>+</sup>                     | C <sub>17</sub> H <sub>36</sub> NO <sub>2</sub> <sup>+</sup>  | 286.2746               | -11.9            |
| 268.2632            | [LCB t17:0+H-2·H <sub>2</sub> O] <sup>+</sup>                   | C <sub>17</sub> H <sub>34</sub> NO <sup>+</sup>               | 268.2640               | -3.0             |
| 250.2563            | [LCB t17:0+H-3·H <sub>2</sub> O] <sup>+</sup>                   | C <sub>17</sub> H <sub>32</sub> N <sup>+</sup>                | 250.2535               | 11.2             |
| 398.3541            | [Amino FA h22:0+H+C <sub>2</sub> H <sub>3</sub> O] <sup>+</sup> | C <sub>24</sub> H <sub>48</sub> NO <sub>3</sub> <sup>+</sup>  | 398.3634               | -23.3            |
| 356.3506            | [Amino FA h22:0+H] <sup>+</sup>                                 | C <sub>22</sub> H <sub>46</sub> NO <sub>2</sub> <sup>+</sup>  | 356.3529               | -6.5             |

**Figure S41: LC-MS/MS analysis of vGSL t17:0/h22:0.** A putative structure is presented, as reported previously<sup>8</sup>. The structure is supported by a list of fragments detected in MS/MS mode (Metabolomics Standards Initiative level 2 annotation<sup>2</sup>). Fragments were detected in positive ionization MS/MS mode using [M+H]<sup>+</sup> = 804.6565 as the precursor ion (Table S3).



1 **Table S1: Putative lipid biomarkers for susceptible and resistant *E. huxleyi* cells.**

| CL | Measured<br><i>m/z</i> | RT<br>(min) | Adduct<br>ion                     | Relative abundance in<br><i>E. huxleyi</i> strains* |      |      |      | Related adduct ions<br>and fragments                                                                                           | Predicted<br>formula                            | Theoretical<br><i>m/z</i> | Mass error<br>(ppm) | Putative identification <sup>†</sup> |
|----|------------------------|-------------|-----------------------------------|-----------------------------------------------------|------|------|------|--------------------------------------------------------------------------------------------------------------------------------|-------------------------------------------------|---------------------------|---------------------|--------------------------------------|
|    |                        |             |                                   | 373                                                 | 379  | 2090 | 374  |                                                                                                                                |                                                 |                           |                     |                                      |
| i  | 874.7850               | 16.27       | [M+NH <sub>4</sub> ] <sup>+</sup> | 0.03                                                | 1.00 | 0.11 | 0.02 | 879.7416 [M+Na] <sup>+</sup><br>895.7136 [M+K] <sup>+</sup><br>915.8124 [M+NH <sub>4</sub> +ACN] <sup>+</sup>                  | C <sub>55</sub> H <sub>100</sub> O <sub>6</sub> | 874.7864                  | -1.6                |                                      |
| i  | 1131.9499              | 17.69       | [M+Na] <sup>+</sup>               | 0.03                                                | 1.00 | 0.06 | 0.03 | 1127.9918 [M+NH <sub>4</sub> ] <sup>+</sup><br>1147.9221 [M+K] <sup>+</sup><br>1168.0194 [M+NH <sub>4</sub> +ACN] <sup>+</sup> | C <sub>71</sub> H <sub>128</sub> O <sub>8</sub> | 1131.9507                 | -0.7                |                                      |
| i  | 804.5975               | 12.25       | [M+H] <sup>+</sup>                | 0.00                                                | 1.00 | 0.00 | 0.00 | 826.5792 [M+Na] <sup>+</sup>                                                                                                   | C <sub>47</sub> H <sub>81</sub> NO <sub>9</sub> | 804.5990                  | -1.9                | resGSL d19:4/h22:2 (12)              |
| i  | 792.7025               | 15.75       | [M+NH <sub>4</sub> ] <sup>+</sup> | 0.09                                                | 1.00 | 0.02 | 0.02 | 797.6631 [M+Na] <sup>+</sup><br>813.6312 [M+K] <sup>+</sup><br>833.7350 [M+NH <sub>4</sub> +ACN] <sup>+</sup>                  | C <sub>49</sub> H <sub>90</sub> O <sub>6</sub>  | 792.7081                  | -7.1                |                                      |
| i  | 1107.9525              | 17.79       | [M+Na] <sup>+</sup>               | 0.04                                                | 1.00 | 0.08 | 0.05 | 1102.9943 [M+NH <sub>4</sub> ] <sup>+</sup><br>1123.9291 [M+K] <sup>+</sup><br>1144.0177 [M+NH <sub>4</sub> +ACN] <sup>+</sup> | C <sub>69</sub> H <sub>128</sub> O <sub>8</sub> | 1107.9507                 | 1.6                 |                                      |
| i  | 1157.9644              | 17.54       | [M+Na] <sup>+</sup>               | 0.03                                                | 1.00 | 0.09 | 0.04 | 1052.9989 [M+NH <sub>4</sub> ] <sup>+</sup><br>1173.9388 [M+K] <sup>+</sup><br>1194.0355 [M+NH <sub>4</sub> +ACN] <sup>+</sup> | C <sub>73</sub> H <sub>130</sub> O <sub>8</sub> | 1157.9663                 | -1.6                |                                      |
| i  | 1103.9186              | 17.19       | [M+Na] <sup>+</sup>               | 0.03                                                | 1.00 | 0.06 | 0.02 | 1098.9637 [M+NH <sub>4</sub> ] <sup>+</sup><br>1119.8962 [M+K] <sup>+</sup><br>1139.9843 [M+NH <sub>4</sub> +ACN] <sup>+</sup> | C <sub>69</sub> H <sub>124</sub> O <sub>8</sub> | 1103.9194                 | -0.7                |                                      |
| i  | 1109.9645              | 18.22       | [M+Na] <sup>+</sup>               | 0.02                                                | 1.00 | 0.04 | 0.01 | 1105.0076 [M+NH <sub>4</sub> ] <sup>+</sup><br>1125.9380 [M+K] <sup>+</sup><br>1146.0285 [M+NH <sub>4</sub> +ACN] <sup>+</sup> | C <sub>69</sub> H <sub>130</sub> O <sub>8</sub> | 1109.9663                 | -1.6                |                                      |
| i  | 822.7543               | 16.28       | [M+NH <sub>4</sub> ] <sup>+</sup> | 0.05                                                | 1.00 | 0.06 | 0.01 | 827.7097 [M+Na] <sup>+</sup><br>843.6827 [M+K] <sup>+</sup><br>863.7809 [M+NH <sub>4</sub> +ACN] <sup>+</sup>                  | C <sub>51</sub> H <sub>96</sub> O <sub>6</sub>  | 822.7551                  | -1.0                |                                      |
| CL | Measured<br><i>m/z</i> | RT<br>(min) | Adduct<br>ion                     | Relative abundance in<br><i>E. huxleyi</i> strains* |      |      |      | Related adduct ions<br>and fragments                                                                                           | Predicted<br>formula                            | Theoretical<br><i>m/z</i> | Mass error<br>(ppm) | Putative identification <sup>†</sup> |

|    |                        |                 |                                   | 373                                                 | 379  | 2090 | 374  |                                                                                                                                                                   |                                                                                                     |                           |                     |                                            |
|----|------------------------|-----------------|-----------------------------------|-----------------------------------------------------|------|------|------|-------------------------------------------------------------------------------------------------------------------------------------------------------------------|-----------------------------------------------------------------------------------------------------|---------------------------|---------------------|--------------------------------------------|
| CL | Measured<br><i>m/z</i> | RT<br>(min)     | Adduct<br>ion                     | Relative abundance in<br><i>E. huxleyi</i> strains* |      |      |      | Related adduct ions<br>and fragments                                                                                                                              | Predicted<br>formula                                                                                | Theoretical<br><i>m/z</i> | Mass error<br>(ppm) | Putative identification <sup>†</sup>       |
|    |                        |                 |                                   | 373                                                 | 379  | 2090 | 374  |                                                                                                                                                                   |                                                                                                     |                           |                     |                                            |
| i  | 794.7205               | 16.00           | [M+NH <sub>4</sub> ] <sup>+</sup> | 0.08                                                | 1.00 | 0.03 | 0.00 | 799.6802 [M+Na] <sup>+</sup><br>815.6542 [M+K] <sup>+</sup><br>835.7536 [M+NH <sub>4</sub> +ACN] <sup>+</sup><br>549.4891 fragment                                | C <sub>49</sub> H <sub>92</sub> O <sub>6</sub>                                                      | 794.7238                  | -4.2                |                                            |
| i  | 842.7230               | 15.55           | [M+NH <sub>4</sub> ] <sup>+</sup> | 0.12                                                | 1.00 | 0.03 | 0.01 | 825.6941 [M+H] <sup>+</sup><br>847.6777 [M+Na] <sup>+</sup><br>863.6524 [M+K] <sup>+</sup><br>883.7512 [M+NH <sub>4</sub> +ACN] <sup>+</sup>                      | C <sub>53</sub> H <sub>92</sub> O <sub>6</sub>                                                      | 842.7238                  | -0.9                |                                            |
| ii | 802.6722               | 14.44           | [M+H] <sup>+</sup>                | 0.08                                                | 1.00 | 0.05 | 0.04 | 824.6601 [M+Na] <sup>+</sup>                                                                                                                                      | C <sub>46</sub> H <sub>91</sub> NO <sub>9</sub>                                                     | 802.6772                  | -6.2                | GSL d18:0/h22:0 (5)                        |
| ii | 816.6531               | 13.77           | [M+H] <sup>+</sup>                | 0.31                                                | 1.00 | 0.04 | 0.02 | 838.6379 [M+Na] <sup>+</sup>                                                                                                                                      | C <sub>46</sub> H <sub>89</sub> NO <sub>10</sub>                                                    | 816.6565                  | -4.2                | GSL t18:0/h22:1 (9)                        |
| ii | 794.6107               | 13.12,<br>13.03 | [M+H] <sup>+</sup>                | 0.91                                                | 1.00 | 0.05 | 0.05 | 816.5953 [M+Na] <sup>+</sup>                                                                                                                                      | C <sub>46</sub> H <sub>83</sub> NO <sub>9</sub>                                                     | 794.6146                  | -4.9                | GSL d18:3/h22:1 (1)<br>GSL d19:3/h21:1 (3) |
| ii | 792.5980               | 12.47           | [M+H] <sup>+</sup>                | 1.00                                                | 0.92 | 0.02 | 0.01 | 814.5797 [M+Na] <sup>+</sup><br>774.5857 [M+H-H <sub>2</sub> O] <sup>+</sup>                                                                                      | C <sub>46</sub> H <sub>81</sub> NO <sub>9</sub>                                                     | 792.5990                  | -1.3                | GSL d18:3/h22:2 (2)                        |
| ii | 756.5940               | 14.38           | [M+NH <sub>4</sub> ] <sup>+</sup> | 0.52                                                | 1.00 | 0.02 | 0.00 | 739.5632 [M+H] <sup>+</sup><br>761.5490 [M+Na] <sup>+</sup><br>777.5237 [M+K] <sup>+</sup><br>797.6189 [M+NH <sub>4</sub> +ACN] <sup>+</sup><br>377.3207 fragment | C <sub>50</sub> H <sub>74</sub> O <sub>4</sub>                                                      | 756.5931                  | 1.2                 |                                            |
| ii | 392.3316               | 10.07           |                                   | 0.85                                                | 1.00 | 0.01 | 0.00 |                                                                                                                                                                   |                                                                                                     |                           |                     |                                            |
| ii | 820.6278               | 13.18           | [M+H] <sup>+</sup>                | 1.00                                                | 0.44 | 0.03 | 0.02 | 842.6108 [M+Na] <sup>+</sup>                                                                                                                                      | C <sub>48</sub> H <sub>85</sub> NO <sub>9</sub>                                                     | 820.6303                  | -3.0                | GSL d19:3/h23:2 (4)                        |
| ii | 1103.7674              | 15.11           | [M+Na] <sup>+</sup>               | 1.00                                                | 0.28 | 0.05 | 0.02 | 1098.8182 [M+NH <sub>4</sub> ] <sup>+</sup><br>1119.7434 [M+K] <sup>+</sup><br>1139.8386 [M+NH <sub>4</sub> +ACN] <sup>+</sup>                                    | C <sub>72</sub> H <sub>104</sub> O <sub>7</sub><br>C <sub>54</sub> H <sub>112</sub> O <sub>20</sub> | 1103.7680<br>1103.7654    | -0.5<br>1.8         |                                            |
| ii | 688.4957               | 10.09           |                                   | 0.89                                                | 1.00 | 0.05 | 0.02 |                                                                                                                                                                   |                                                                                                     |                           |                     |                                            |

| ii  | 377.3209               | 14.63       | fragment                              | 0.51                                                | 1.00 | 0.02 | 0.02 | 739.5665 [M+H] <sup>+</sup><br>756.6094 [M+NH <sub>4</sub> ] <sup>+</sup><br>761.5500 [M+Na] <sup>+</sup><br>777.5229 [M+K] <sup>+</sup><br>797.6198 [M+NH <sub>4</sub> +ACN] <sup>+</sup> | C <sub>50</sub> H <sub>74</sub> O <sub>4</sub> |                           |                     |                                      |
|-----|------------------------|-------------|---------------------------------------|-----------------------------------------------------|------|------|------|--------------------------------------------------------------------------------------------------------------------------------------------------------------------------------------------|------------------------------------------------|---------------------------|---------------------|--------------------------------------|
| iii | 845.5698               | 13.46       | [M+H] <sup>+</sup>                    | 1.00                                                | 0.03 | 0.07 | 0.03 | 862.6009 [M+NH <sub>4</sub> ] <sup>+</sup><br>867.5546 [M+Na] <sup>+</sup><br>883.5267 [M+K] <sup>+</sup><br>903.6300 [M+NH <sub>4</sub> +ACN] <sup>+</sup>                                | C <sub>56</sub> H <sub>76</sub> O <sub>6</sub> | 845.5720                  | -2.6                |                                      |
| iii | 827.7633               | 14.97       | [M+NH <sub>4</sub> +ACN] <sup>+</sup> | 1.00                                                | 0.05 | 0.04 | 0.02 | 769.7073 [M+H] <sup>+</sup><br>786.7392 [M+NH <sub>4</sub> ] <sup>+</sup><br>791.6890 [M+Na] <sup>+</sup><br>807.6598 [M+K] <sup>+</sup>                                                   | C <sub>51</sub> H <sub>92</sub> O <sub>4</sub> | 827.7605                  | 3.4                 |                                      |
| iii | 789.6724               | 16.36       | [M+Na] <sup>+</sup>                   | 1.00                                                | 0.01 | 0.01 | 0.06 | 767.6915 [M+H] <sup>+</sup><br>784.7193 [M+NH <sub>4</sub> ] <sup>+</sup><br>805.6456 [M+K] <sup>+</sup><br>825.7453 [M+NH <sub>4</sub> +ACN] <sup>+</sup>                                 | C <sub>51</sub> H <sub>90</sub> O <sub>4</sub> | 789.6737                  | -1.6                |                                      |
| iii | 803.6511               | 15.41       | [M+Na] <sup>+</sup>                   | 1.00                                                | 0.00 | 0.02 | 0.07 | 781.6673 [M+H] <sup>+</sup><br>798.6957 [M+NH <sub>4</sub> ] <sup>+</sup><br>819.6252 [M+K] <sup>+</sup><br>839.7203 [M+NH <sub>4</sub> +ACN] <sup>+</sup>                                 | C <sub>51</sub> H <sub>88</sub> O <sub>5</sub> | 803.6529                  | -2.2                |                                      |
| iii | 781.7055               | 16.51       | [M+H] <sup>+</sup>                    | 1.00                                                | 0.01 | 0.05 | 0.07 | 798.7120 [M+NH <sub>4</sub> ] <sup>+</sup><br>803.6903 [M+Na] <sup>+</sup><br>819.6631 [M+K] <sup>+</sup><br>839.7612 [M+NH <sub>4</sub> +ACN] <sup>+</sup>                                | C <sub>52</sub> H <sub>92</sub> O <sub>4</sub> | 781.7074                  | -2.4                |                                      |
| iii | 795.6816               | 15.55       | [M+H] <sup>+</sup>                    | 1.00                                                | 0.43 | 0.03 | 0.03 | 812.7110 [M+NH <sub>4</sub> ] <sup>+</sup><br>817.6689 [M+Na] <sup>+</sup><br>833.6425 [M+K] <sup>+</sup><br>853.7407 [M+NH <sub>4</sub> +ACN] <sup>+</sup>                                | C <sub>52</sub> H <sub>90</sub> O <sub>5</sub> | 795.6867                  | -6.4                |                                      |
| CL  | Measured<br><i>m/z</i> | RT<br>(min) | Adduct<br>ion                         | Relative abundance in<br><i>E. huxleyi</i> strains* |      |      |      | Related adduct ions<br>and fragments                                                                                                                                                       | Predicted<br>formula                           | Theoretical<br><i>m/z</i> | Mass error<br>(ppm) | Putative identification <sup>†</sup> |
|     |                        |             |                                       | 373                                                 | 379  | 2090 | 374  |                                                                                                                                                                                            |                                                |                           |                     |                                      |

| iii | 901.7199               | 13.47       | [M+NH <sub>4</sub> +ACN] <sup>+</sup> | 1.00                                                | 0.03 | 0.03 | 0.60 | 860.6871 [M+NH <sub>4</sub> ] <sup>+</sup><br>865.6443 [M+Na] <sup>+</sup><br>881.6238 [M+K] <sup>+</sup>                                                   |                                                  |                           |                     |                                      |
|-----|------------------------|-------------|---------------------------------------|-----------------------------------------------------|------|------|------|-------------------------------------------------------------------------------------------------------------------------------------------------------------|--------------------------------------------------|---------------------------|---------------------|--------------------------------------|
| iii | 865.6523               | 14.17       | [M+Na] <sup>+</sup>                   | 1.00                                                | 0.03 | 0.04 | 0.88 | 860.6982 [M+NH <sub>4</sub> ] <sup>+</sup><br>881.6211 [M+K] <sup>+</sup><br>901.7237 [M+NH <sub>4</sub> +ACN] <sup>+</sup>                                 | C <sub>52</sub> H <sub>90</sub> O <sub>8</sub>   | 865.6533                  | -1.2                |                                      |
| iii | 865.6536               | 11.66       | [M+Na] <sup>+</sup>                   | 1.00                                                | 0.02 | 0.04 | 0.69 | 860.7000 [M+NH <sub>4</sub> ] <sup>+</sup><br>881.6304 [M+K] <sup>+</sup><br>901.7264 [M+NH <sub>4</sub> +ACN] <sup>+</sup>                                 | C <sub>52</sub> H <sub>90</sub> O <sub>8</sub>   | 865.6533                  | 0.3                 |                                      |
| iii | 901.7229               | 11.90       |                                       | 1.00                                                | 0.03 | 0.02 | 0.59 |                                                                                                                                                             |                                                  |                           |                     |                                      |
| iii | 653.5090               | 10.67       | [M+H] <sup>+</sup>                    | 1.00                                                | 0.02 | 0.05 | 0.21 | 675.4895 [M+Na] <sup>+</sup>                                                                                                                                |                                                  |                           |                     |                                      |
| iii | 620.4907               | 10.04       | [M+H] <sup>+</sup>                    | 1.00                                                | 0.01 | 0.01 | 0.13 | 642.4722 [M+Na] <sup>+</sup>                                                                                                                                |                                                  |                           |                     |                                      |
| iv  | 806.6143               | 12.98       | [M+H] <sup>+</sup>                    | 0.00                                                | 0.00 | 0.00 | 1.00 | 828.5963 [M+Na] <sup>+</sup>                                                                                                                                | C <sub>47</sub> H <sub>83</sub> NO <sub>9</sub>  | 806.6146                  | -0.4                | 374-GSL d19:3/h22:2 (13)             |
| iv  | 510.2931               | 4.39        |                                       | 0.02                                                | 0.04 | 0.13 | 1.00 |                                                                                                                                                             |                                                  |                           |                     |                                      |
| iv  | 804.5981               | 12.34       | [M+H] <sup>+</sup>                    | 0.00                                                | 0.00 | 0.00 | 1.00 | 826.5803 [M+Na] <sup>+</sup>                                                                                                                                | C <sub>47</sub> H <sub>81</sub> NO <sub>9</sub>  | 804.5990                  | -1.1                | 374-GSL d19:3/h22:3 (14)             |
| iv  | 557.5291               | 13.67       | [M+H] <sup>+</sup>                    | 0.05                                                | 0.02 | 0.11 | 1.00 | 574.5554 [M+NH <sub>4</sub> ] <sup>+</sup><br>579.5114 [M+Na] <sup>+</sup><br>595.4860 [M+K] <sup>+</sup><br>615.5819 [M+NH <sub>4</sub> +ACN] <sup>+</sup> |                                                  |                           |                     |                                      |
| iv  | 555.5110               | 13.23       | [M+H] <sup>+</sup>                    | 0.03                                                | 0.01 | 0.08 | 1.00 | 572.5394 [M+NH <sub>4</sub> ] <sup>+</sup><br>577.4965 [M+Na] <sup>+</sup><br>593.4704 [M+K] <sup>+</sup><br>613.5673 [M+NH <sub>4</sub> +ACN] <sup>+</sup> | C <sub>38</sub> H <sub>66</sub> O <sub>2</sub>   | 555.5141                  | -5.6                |                                      |
| iv  | 769.4680               | 6.52        |                                       | 0.00                                                | 0.04 | 0.40 | 1.00 |                                                                                                                                                             |                                                  |                           |                     |                                      |
| CL  | Measured<br><i>m/z</i> | RT<br>(min) | Adduct<br>ion                         | Relative abundance in<br><i>E. huxleyi</i> strains* |      |      |      | Related adduct ions<br>and fragments                                                                                                                        | Predicted<br>formula                             | Theoretical<br><i>m/z</i> | Mass error<br>(ppm) | Putative identification <sup>†</sup> |
|     |                        |             |                                       | 373                                                 | 379  | 2090 | 374  |                                                                                                                                                             |                                                  |                           |                     |                                      |
| iv  | 870.6664               | 12.88       | [M+H] <sup>+</sup>                    | 0.00                                                | 0.00 | 0.80 | 1.00 | 892.6475 [M+Na] <sup>+</sup><br>914.6282 [M+2Na] <sup>+</sup> ?                                                                                             | C <sub>49</sub> H <sub>91</sub> NO <sub>11</sub> | 870.6670                  | -0.7                | sGSL d18:2/c22:0                     |

|    |           |       |                                   |      |      |      |      |                                                                                                                                |                                                 |           |     |
|----|-----------|-------|-----------------------------------|------|------|------|------|--------------------------------------------------------------------------------------------------------------------------------|-------------------------------------------------|-----------|-----|
|    |           |       |                                   |      |      |      |      | 852.6519 [M+H-H <sub>2</sub> O] <sup>+</sup><br>620.5939 [M+H-(Sialic acid-H)] <sup>+</sup>                                    |                                                 |           |     |
| iv | 807.5005  | 10.62 |                                   | 0.00 | 0.01 | 0.67 | 1.00 |                                                                                                                                |                                                 |           |     |
| iv | 1143.9105 | 18.44 | [M+Na] <sup>+</sup>               | 0.01 | 0.02 | 0.39 | 1.00 | 1138.9480 [M+NH <sub>4</sub> ] <sup>+</sup><br>1159.8859 [M+K] <sup>+</sup><br>1179.9766 [M+NH <sub>4</sub> +ACN] <sup>+</sup> | C <sub>78</sub> H <sub>120</sub> O <sub>4</sub> | 1143.9084 | 1.8 |
| iv | 1120.6988 | 11.38 | [M+NH <sub>4</sub> ] <sup>+</sup> | 0.04 | 0.02 | 1.00 | 0.24 | 1125.6523 [M+Na] <sup>+</sup>                                                                                                  |                                                 |           |     |

2 The putative lipids species are organized according to the clusters (CL) in Fig. 2a, with the cluster number indicated for each one. \*The relative abundance in *E. huxleyi* strains  
3 was calculated for the mean intensity in cultures without EhV as follows: the highest value for each mass feature (i.e., relative intensity) was set as one (colored in brown) and  
4 was used to calculate the abundance in the other strains. Relative abundance of > 0.1 was colored in light brown. †GSL species were identified based on MS/MS spectra,  
5 according to the Metabolomics Standards Initiative, ‘Level 2 – putatively annotated compounds’<sup>2</sup>, see Fig. S4-S12.

6

**Table S2: Additional putatively annotated GSLs species.**

| #  | GSL species<br>LCB/FA   | Measured $m/z$<br>([M+H] <sup>+</sup> ) | RT<br>(min) | Predicted<br>formula                             | Theoretical $m/z$<br>([M+H] <sup>+</sup> ) | Mass error<br>(ppm) |
|----|-------------------------|-----------------------------------------|-------------|--------------------------------------------------|--------------------------------------------|---------------------|
| 6  | d18:0/h22:1             | 800.6600                                | 14.22       | C <sub>46</sub> H <sub>89</sub> NO <sub>9</sub>  | 800.6616                                   | -2.0                |
| 7  | d18:1/h22:1             | 798.6440                                | 14.01       | C <sub>46</sub> H <sub>87</sub> NO <sub>9</sub>  | 798.6459                                   | -2.4                |
| 8  | t18:0/h22:0             | 818.6702                                | 14.00       | C <sub>46</sub> H <sub>91</sub> NO <sub>10</sub> | 818.6721                                   | -2.3                |
| 10 | t18:0/h22:2             | 814.6346                                | 13.18       | C <sub>46</sub> H <sub>87</sub> NO <sub>10</sub> | 814.6408                                   | -7.6                |
| 11 | d19:4/h22:1<br>(resGSL) | 806.6127                                | 12.92       | C <sub>47</sub> H <sub>83</sub> NO <sub>9</sub>  | 806.6146                                   | -2.4                |

7

8 **Table S3: GSL species identified in the *E. huxleyi*-EhV model system.**

| Head group  | LCB/FA composition | Chemical formula                                 | RT (min) | Theoretical $m/z$ ([M+H] <sup>+</sup> ) | Name in the <i>E. huxleyi</i> -EhV system | Common name* (LIPID MAPS ID) | Occurrence                          | Reference                   |
|-------------|--------------------|--------------------------------------------------|----------|-----------------------------------------|-------------------------------------------|------------------------------|-------------------------------------|-----------------------------|
| Hexose      | d18:0/h22:0        | C <sub>46</sub> H <sub>91</sub> NO <sub>9</sub>  | 14.44    | 802.6772                                | Group B (5)                               | HexCer(d18:0/22:0(2OH))      | Resistant cells, infected cells     | This study                  |
| Hexose      | d18:0/h22:1        | C <sub>46</sub> H <sub>89</sub> NO <sub>9</sub>  | 14.22    | 800.6616                                | Group B (6)                               | HexCer(d18:0/22:1(2OH))      | Resistant cells, infected cells     | This study                  |
| Hexose      | d18:1/h22:1        | C <sub>46</sub> H <sub>87</sub> NO <sub>9</sub>  | 14.01    | 798.6459                                | Group B (7)                               | HexCer(d18:1/22:1(2OH))      | Resistant cells, infected cells     | This study                  |
| Sialic acid | d18:1/c22:0        | C <sub>49</sub> H <sub>93</sub> NO <sub>11</sub> | 12.88    | 872.6827                                | sGSL                                      |                              | Susceptible strains, infected cells | Fulton et al., 2014         |
| Sialic acid | d18:2/c22:0        | C <sub>49</sub> H <sub>91</sub> NO <sub>11</sub> | 13.25    | 870.6670                                | sGSL                                      |                              | Susceptible strains, infected cells | Fulton <i>et al.</i> , 2014 |
| Hexose      | d18:3/h22:1        | C <sub>46</sub> H <sub>83</sub> NO <sub>9</sub>  | 13.12    | 794.6146                                | Group A (1)                               | HexCer(d18:3/22:1(2OH))      | All cell types                      | This study                  |
| Hexose      | d18:3/h22:2        | C <sub>46</sub> H <sub>81</sub> NO <sub>9</sub>  | 12.47    | 792.5990                                | Group A (2)                               | HexCer(d18:3/22:2(2OH))      | All cell types                      | This study                  |
| Hexose      | d19:3/h21:1        | C <sub>46</sub> H <sub>83</sub> NO <sub>9</sub>  | 13.03    | 794.6146                                | Group A (3)                               | HexCer(d19:3/21:1(2OH))      | All cell types                      | This study                  |
| Hexose      | d19:3/h22:1        | C <sub>47</sub> H <sub>85</sub> NO <sub>9</sub>  | 13.41    | 808.6303                                | hGSL                                      | HexCer(d19:3/22:1(2OH))      | All cell types                      | Vardi <i>et al.</i> , 2012  |
| Hexose      | d19:3/h22:2        | C <sub>47</sub> H <sub>83</sub> NO <sub>9</sub>  | 12.80    | 806.6146                                | hGSL                                      | HexCer(d19:3/22:2(2OH))      | All cell types                      | Vardi <i>et al.</i> , 2012  |
| Hexose      | d19:3/h22:2        | C <sub>47</sub> H <sub>83</sub> NO <sub>9</sub>  | 12.98    | 806.6146                                | 374-GSL (13)                              | HexCer(d19:3/22:2(2OH))      | Susceptible cells, not all strains  | This study                  |
| Hexose      | d19:3/h22:3        | C <sub>47</sub> H <sub>81</sub> NO <sub>9</sub>  | 12.34    | 804.5990                                | 374-GSL (14)                              | HexCer(d19:3/22:3(2OH))      | Susceptible cells, not all strains  | This study                  |
| Hexose      | d19:3/h23:2        | C <sub>48</sub> H <sub>85</sub> NO <sub>9</sub>  | 13.18    | 820.6303                                | Group A (4)                               | HexCer(d19:3/23:2(2OH))      | All cell types                      | This study                  |



| Head group | LCB/FA composition | Chemical formula                                 | RT (min) | Theoretical $m/z$ ([M+H] <sup>+</sup> ) | Name in the <i>E. huxleyi</i> -EhV system | Common name* (LIPID MAPS ID)              | Occurrence                         | Reference                                              |
|------------|--------------------|--------------------------------------------------|----------|-----------------------------------------|-------------------------------------------|-------------------------------------------|------------------------------------|--------------------------------------------------------|
| Hexose     | d19:4/h22:1        | C <sub>47</sub> H <sub>83</sub> NO <sub>9</sub>  | 12.92    | 806.6146                                | resGSL (11)                               | HexCer(d19:4/22:1(2OH))                   | Resistant cells                    | This study                                             |
| Hexose     | d19:4/h22:2        | C <sub>47</sub> H <sub>81</sub> NO <sub>9</sub>  | 12.25    | 804.5990                                | resGSL (12)                               | HexCer(d19:4/22:2(2OH))                   | Resistant cells                    | This study                                             |
| Hexose     | t16:0/h22:0        | C <sub>44</sub> H <sub>87</sub> NO <sub>10</sub> | 13.36    | 790.6408                                | vGSL                                      | HexCer(t16:0/22:0(2OH))                   | Infected cells                     | Schleyer <i>et al.</i> , 2019                          |
| Hexose     | t17:0/h22:0        | C <sub>45</sub> H <sub>89</sub> NO <sub>10</sub> | 13.69    | 804.6565                                | vGSL                                      | HexCer(t17:0/22:0(2OH))<br>(LMSP05010197) | Infected cells                     | Vardi <i>et al.</i> , 2012<br>Ziv <i>et al.</i> , 2016 |
| Hexose     | t17:0/h22:1        | C <sub>45</sub> H <sub>87</sub> NO <sub>10</sub> | 13.07    | 802.6408                                | vGSL                                      | HexCer(t17:0/22:1(2OH))                   | Infected cells                     | Vardi <i>et al.</i> , 2012<br>Ziv <i>et al.</i> , 2016 |
| Hexose     | t17:0/h23:0        | C <sub>46</sub> H <sub>91</sub> NO <sub>10</sub> | 14.02    | 818.6721                                | vGSL                                      | HexCer(t17:0/23:0(2OH))                   | Infected cells                     | Vardi <i>et al.</i> , 2012<br>Ziv <i>et al.</i> , 2016 |
| Hexose     | t17:0/h23:1        | C <sub>46</sub> H <sub>89</sub> NO <sub>10</sub> | 13.45    | 816.6565                                | vGSL                                      | HexCer(t17:0/23:1(2OH))                   | Infected cells                     | Vardi <i>et al.</i> , 2012<br>Ziv <i>et al.</i> , 2016 |
| Hexose     | t17:0/h24:0        | C <sub>47</sub> H <sub>93</sub> NO <sub>10</sub> | 14.33    | 832.6878                                | vGSL                                      | HexCer(t17:0/24:0(2OH))<br>(LMSP05010196) | Infected cells                     | Vardi <i>et al.</i> , 2012<br>Ziv <i>et al.</i> , 2016 |
| Hexose     | t17:0/h24:1        | C <sub>47</sub> H <sub>91</sub> NO <sub>10</sub> | 13.80    | 830.6721                                | vGSL                                      | HexCer(t17:0/24:1(2OH))                   | Infected cells                     | Vardi <i>et al.</i> , 2012<br>Ziv <i>et al.</i> , 2016 |
| Hexose     | t18:0/h22:0        | C <sub>46</sub> H <sub>91</sub> NO <sub>10</sub> | 14.00    | 818.6721                                | Group B / vGSL (8)                        | HexCer(t18:0/22:0(2OH))                   | Resistant cells,<br>Infected cells | This study,<br>Ziv <i>et al.</i> , 2016                |
| Hexose     | t18:0/h22:1        | C <sub>46</sub> H <sub>89</sub> NO <sub>10</sub> | 13.77    | 816.6565                                | Group B / vGSL (9)                        | HexCer(t18:0/22:1(2OH))                   | Resistant cells,<br>Infected cells | This study                                             |
| Hexose     | t18:0/h22:2        | C <sub>46</sub> H <sub>87</sub> NO <sub>10</sub> | 13.18    | 814.6408                                | Group B / vGSL (10)                       | HexCer(t18:0/22:2(2OH))                   | Resistant cells,<br>Infected cells | This study                                             |

9 \*Common name is based on the LIPID MAPS classification system. LCB, long-chain base; FA, fatty acid; RT, retention time.

10 **Table S4: Genes names and accession numbers.**

| <b>Name</b> | <b>Accession</b>                                                           |
|-------------|----------------------------------------------------------------------------|
| <i>sld1</i> | MZ152812                                                                   |
| <i>sld2</i> | MZ152813, MZ152814 (KJ868223, previously called <i>dcd2</i> )              |
| <i>sld3</i> | MZ152815                                                                   |
| <i>sld4</i> | MZ152816                                                                   |
| <i>sld5</i> | MZ152817, MZ152818                                                         |
| <i>sbh1</i> | MZ152819, MZ152820 (KJ868226, previously called sphinganine hydroxylase 1) |
| <i>sbh2</i> | MZ152821                                                                   |
| <i>sbh3</i> | Predicted from the genome of <i>E. huxleyi</i> CCMP1516                    |
| <i>sbh4</i> | MZ152822                                                                   |
| <i>sbh5</i> | MZ152823                                                                   |
| <i>sbh6</i> | MZ152824, MZ152825                                                         |
| <i>sbh7</i> | MZ152826, MZ152827                                                         |

11 Accession numbers in brackets are of genes that were deposited in GenBank from our earlier definitions<sup>5</sup>.

12 **Table S5: Information regarding the proteins used to build the SLD phylogenetic tree.**

| Name                      | Organism                                  | Accession number   | Description                                                                 |
|---------------------------|-------------------------------------------|--------------------|-----------------------------------------------------------------------------|
| E. huxleyi SLD1           | <i>Emiliana huxleyi</i> CCMP373           | MZ152812           | Sphingolipid desaturase 1                                                   |
| E. huxleyi SLD2           | <i>Emiliana huxleyi</i> CCMP2090, CCMP373 | MZ152813, MZ152814 | Sphingolipid desaturase 2                                                   |
| E. huxleyi SLD3           | <i>Emiliana huxleyi</i> CCMP2090          | MZ152815           | Sphingolipid desaturase 3                                                   |
| E. huxleyi SLD4           | <i>Emiliana huxleyi</i> CCMP373           | MZ152816           | Sphingolipid desaturase 4                                                   |
| E. huxleyi SLD5           | <i>Emiliana huxleyi</i> CCMP2090, CCMP373 | MZ152817, MZ152818 | Sphingolipid desaturase 5                                                   |
| EhV201 SLD                | <i>Emiliana huxleyi</i> virus 201         | AET97947.1         | Fatty acid desaturase                                                       |
| A. leveillei              | <i>Anemone leveillei</i>                  | AAQ10732.1         | Delta-8-sphingolipid desaturase                                             |
| A. millepora1             | <i>Acropora millepora</i>                 | XP_029201914.1     | Sphingolipid delta(4)-desaturase DES1-like                                  |
| A. millepora2             | <i>Acropora millepora</i>                 | XP_029197704.1     | Delta(8)-fatty-acid desaturase 2-like                                       |
| A. pisum                  | <i>Acyrtosiphon pisum</i>                 | NP_001155533.1     | Sphingolipid delta(4)-desaturase DES1-like                                  |
| A. thaliana1 <sup>†</sup> | <i>Arabidopsis thaliana</i>               | NP_192402.1        | Fatty acid desaturase family protein                                        |
| A. thaliana2              | <i>Arabidopsis thaliana</i>               | OAP10850.1         | SLD2                                                                        |
| A. trichopoda1            | <i>Amborella trichopoda</i>               | XP_011625523.1     | Sphingolipid delta(4)-desaturase DES1-like                                  |
| A. trichopoda2            | <i>Amborella trichopoda</i>               | XP_006847040.1     | Acyl-lipid (9-3)-desaturase                                                 |
| Bacteroidetes1            | <i>Bacteroidetes</i> bacterium SW_11_45_7 | PSR04501.1         | Fatty acid desaturase                                                       |
| Bacteroidetes2            | <i>Bacteroidetes</i> bacterium 46-16      | OJW85131.1         | Fatty acid desaturase                                                       |
| B. distachyon             | <i>Brachypodium distachyon</i>            | XP_003578001.2     | Delta(8)-fatty-acid desaturase 2                                            |
| B. floridae               | <i>Branchiostoma floridae</i>             | XP_002586717.1     | Hypothetical protein BRAFLDRAFT_121704                                      |
| Burkholderia              | <i>Burkholderia</i> sp. H160              | EEA04242.1         | Conserved hypothetical protein                                              |
| C. follicularis1          | <i>Cephalotus follicularis</i>            | GAV77917.1         | FA_desaturase domain-containing protein/Lipid_DES domain-containing protein |
| C. follicularis2          | <i>Cephalotus follicularis</i>            | GAV56989.1         | Cyt-b5 domain-containing protein/FA_desaturase domain-containing protein    |
| C. p. bellii              | <i>Chrysemys picta bellii</i>             | XP_005283813.1     | Sphingolipid delta(4)-desaturase/C4-monooxygenase DES2-like                 |
| C. reinhardtii            | <i>Chlamydomonas reinhardtii</i>          | XP_001691564.1     | Predicted protein                                                           |
| C. roenbergensis1         | <i>Cafeteria roenbergensis</i>            | KAA0156831.1       | Hypothetical protein FNF29_00941                                            |
| C. roenbergensis2         | <i>Cafeteria roenbergensis</i>            | KAA0153464.1       | Hypothetical protein FNF28_06948                                            |

| Name              | Organism                                        | Accession number               | Description                                                   |
|-------------------|-------------------------------------------------|--------------------------------|---------------------------------------------------------------|
| C. roenbergensis3 | <i>Cafeteria roenbergensis</i>                  | KAA0174097.1                   | Hypothetical protein FNF27_04483                              |
| C. tobini1        | <i>Chrysochromulina tobini</i>                  | KOO24852.1                     | Sphingolipid delta -desaturase des1-like protein              |
| C. tobini2        | <i>Chrysochromulina tobini</i>                  | KOO20797.1                     | Fatty acid desaturase                                         |
| C. tobini3        | <i>Chrysochromulina tobini</i>                  | KOO29180.1                     | Hypothetical protein Ctob_007971                              |
| C. virginica      | <i>Crassostrea virginica</i>                    | XP_022329012.1                 | Sphingolipid delta(4)-desaturase DES1-like                    |
| D. melanogaster   | <i>Drosophila melanogaster</i>                  | NP_476594.1                    | Infertile crescent, isoform A                                 |
| D. pulex          | <i>Daphnia pulex</i>                            | EFX83396.1                     | Hypothetical protein DAPPUDRAFT_48184                         |
| E. pallida1       | <i>Exaiptasia pallida (Exaiptasia diaphana)</i> | XP_020891967.1                 | Sphingolipid delta(4)-desaturase DES1                         |
| E. pallida2       | <i>Exaiptasia pallida (Exaiptasia diaphana)</i> | XP_020912814.2, XP_020912805.1 | Delta(8)-fatty-acid desaturase                                |
| E. siliculosus    | <i>Ectocarpus siliculosus</i>                   | CBN74378.1                     | Fatty acid desaturase                                         |
| F. ambrosium      | <i>Fusarium ambrosium</i>                       | RSM00058.1                     | Hypothetical protein CDV31_011915                             |
| G. cichoracearum  | <i>Golovinomyces cichoracearum</i>              | RKF82449.1                     | Sphingolipid delta-desaturase                                 |
| H. impetiginosus1 | <i>Handroanthus impetiginosus</i>               | PIN19733.1                     | Fatty acid desaturase                                         |
| H. impetiginosus2 | <i>Handroanthus impetiginosus</i>               | PIN06828.1                     | Delta 6-fatty acid desaturase/delta-8 sphingolipid desaturase |
| I. galbana        | <i>Isochrysis galbana</i>                       | AEV77089.1                     | Delta-6 fatty acid desaturase                                 |
| Isochrysis        | <i>Isochrysis sp. CCMM5001</i>                  | AFB82637.1                     | Fatty acid desaturase                                         |
| K. nitens1        | <i>Klebsormidium nitens</i>                     | GAQ87926.1                     | Dihydrosphingosine delta-4 desaturase                         |
| K. nitens2        | <i>Klebsormidium nitens</i>                     | GAQ87984.1                     | Hypothetical protein KFL_003920030                            |
| K. nitens3        | <i>Klebsormidium nitens</i>                     | GAQ79919.1                     | Sphingobase-D8 Desaturase                                     |
| M. pusilla1       | <i>Micromonas pusilla CCMP1545</i>              | XP_003064164.1                 | Predicted protein                                             |
| M. pusilla2       | <i>Micromonas pusilla CCMP1545</i>              | XP_003054909.1                 | Predicted protein                                             |
| M. pusilla3       | <i>Micromonas pusilla CCMP1545</i>              | XP_003063519.1                 | Predicted protein                                             |
| M. pusilla4       | <i>Micromonas pusilla CCMP1545</i>              | XP_003055443.1                 | Predicted protein                                             |
| M. rosea          | <i>Minicystis rosea</i>                         | WP_146730508.1                 | Fatty acid desaturase                                         |
| N. colorata1      | <i>Nymphaea colorata</i>                        | XP_031478825.1                 | Sphingolipid delta(4)-desaturase DES1-like                    |
| N. colorata2      | <i>Nymphaea colorata</i>                        | XP_031504778.1                 | Delta(8)-fatty-acid desaturase-like                           |
| N. vectensis      | <i>Nematostella vectensis</i>                   | XP_001640617.1                 | Delta(8)-fatty-acid desaturase                                |

| Name                    | Organism                                   | Accession number               | Description                                           |
|-------------------------|--------------------------------------------|--------------------------------|-------------------------------------------------------|
| O. bimaculoides         | <i>Octopus bimaculoides</i>                | XP_014781463.1                 | Predicted: sphingolipid delta(4)-desaturase DES1-like |
| O. sativa1 <sup>†</sup> | <i>Oryza sativa Japonica</i> Group         | XP_015623789.1                 | Sphingolipid delta(4)-desaturase DES1-like            |
| O. sativa2              | <i>Oryza sativa Japonica</i> Group         | XP_015651259.1                 | Delta(8)-fatty-acid desaturase 2                      |
| O. tauri1               | <i>Ostreococcus tauri</i>                  | XP_003082334.1                 | Fatty acid desaturase, type 1                         |
| O. tauri2               | <i>Ostreococcus tauri</i>                  | OUS49176.1                     | Fatty acid desaturase-domain-containing protein       |
| P. miliaceum1           | <i>Panicum miliaceum</i>                   | RLM73192.1                     | Sphingolipid delta(4)-desaturase DES1-like            |
| P. miliaceum2           | <i>Panicum miliaceum</i>                   | RLN34870.1                     | Delta(8)-fatty-acid desaturase 2-like                 |
| P. patens1              | <i>Physcomitrella patens</i>               | XP_024361943.1                 | Sphingolipid delta(4)-desaturase DES1-like            |
| P. patens2              | <i>Physcomitrella patens</i>               | XP_024364920.1                 | Acyl-lipid (9-3)-desaturase-like                      |
| P. roqueforti           | <i>Penicillium roqueforti</i> FM164        | CDM35784.1                     | Fatty acid desaturase, type 1                         |
| P. trichocarpa1         | <i>Populus trichocarpa</i>                 | XP_006377338.2                 | Sphingolipid delta(4)-desaturase DES1-like            |
| P. trichocarpa2         | <i>Populus trichocarpa</i>                 | XP_002308556.1                 | Acyl-lipid (9-3)-desaturase                           |
| S. asiatica1            | <i>Striga asiatica</i>                     | GER36468.1                     | Sphingolipid delta(4)-desaturase DES1                 |
| S. asiatica2            | <i>Striga asiatica</i>                     | GER35419.1                     | Fatty acid desaturase                                 |
| S. microadriaticum      | <i>Symbiodinium microadriaticum</i>        | OLP82839.1                     | Delta(8)-fatty-acid desaturase                        |
| S. moellendorffii1      | <i>Selaginella moellendorffii</i>          | XP_002971294.1, XP_002961512.1 | Sphingolipid delta(4)-desaturase DES1-like            |
| S. moellendorffii2      | <i>Selaginella moellendorffii</i>          | XP_002968817.1                 | Delta(8)-fatty-acid desaturase 2                      |
| Sphingobacteriales1     | <i>Sphingobacteriales</i> bacterium        | RYE19069.1                     | Fatty acid desaturase, partial                        |
| Sphingobacteriales2     | <i>Sphingobacteriales</i> bacterium 48-107 | OJW43059.1                     | Fatty acid desaturase                                 |
| Synechococcus           | <i>Synechococcus</i> sp. PCC 7336          | WP_156820318.1                 | Fatty acid desaturase                                 |
| T. cacao1               | <i>Theobroma cacao</i>                     | XP_007025663.2                 | Predicted: sphingolipid delta(4)-desaturase DES1-like |
| T. cacao2               | <i>Theobroma cacao</i>                     | XP_007012291.1                 | Predicted: acyl-lipid (9-3)-desaturase                |
| T. pseudonana           | <i>Thalassiosira pseudonana</i> CCMP1335   | XP_002291331.1                 | Predicted protein                                     |
| T. turgidum1            | <i>Triticum turgidum</i> subsp. durum      | VAH49645.1                     | Unnamed protein product                               |
| T. turgidum2            | <i>Triticum turgidum</i> subsp. durum      | VAI17523.1                     | Unnamed protein product                               |
| W. hederæ               | <i>Wallemia hederæ</i>                     | TIA87401.1                     | Hypothetical protein E3P99_03193                      |

13 <sup>†</sup>Functionally characterized proteins.

14 **Table S6: Information regarding the proteins used to build the SBH phylogenetic tree.**

| Name                     | Organism                                  | Accession number       | Description                                             |
|--------------------------|-------------------------------------------|------------------------|---------------------------------------------------------|
| E. huxleyi_SBH1          | <i>Emiliana huxleyi</i> CCMP2090, CCMP373 | MZ152820, MZ152819     | Sphingoid base hydroxylase 1                            |
| E. huxleyi_SBH2          | <i>Emiliana huxleyi</i> CCMP2090          | MZ152821               | Sphingoid base hydroxylase 2                            |
| E. huxleyi_SBH3          | <i>Emiliana huxleyi</i>                   | Prediction from genome | Sphingoid base hydroxylase 3                            |
| E. huxleyi_SBH4          | <i>Emiliana huxleyi</i> CCMP373           | MZ152822               | Sphingoid base hydroxylase 4                            |
| E. huxleyi_SBH5          | <i>Emiliana huxleyi</i> CCMP373           | MZ152823               | Sphingoid base hydroxylase 5                            |
| E. huxleyi_SBH6          | <i>Emiliana huxleyi</i> CCMP2090, CCMP373 | MZ152825, MZ152824     | Sphingoid base hydroxylase 6                            |
| E. huxleyi_SBH7          | <i>Emiliana huxleyi</i> CCMP2090, CCMP373 | MZ152826, MZ152827     | Sphingoid base hydroxylase 7                            |
| EhV201_SBH               | <i>Emiliana huxleyi</i> virus 201         | AET97919.1             | Hypothetical protein EPVG_00031                         |
| A. candidus1             | <i>Aspergillus candidus</i>               | XP_024676610.1         | Putative C-4 methylsterol oxidase                       |
| A. candidus2             | <i>Aspergillus candidus</i>               | XP_024670972.1         | Putative C-4 methyl sterol oxidase                      |
| A. castellanii1          | <i>Acanthamoeba castellanii</i> str. Neff | XP_004336833.1         | 4Alpha-methyl-sterol C4-methyl-oxidase                  |
| A. castellanii2          | <i>Acanthamoeba castellanii</i> str. Neff | XP_004336864.1         | C5orf4 protein                                          |
| A. mulundensis           | <i>Aspergillus mulundensis</i>            | XP_026600416.1         | Uncharacterized protein DSM5745_09314                   |
| A. queenslandica         | <i>Amphimedon queenslandica</i>           | XP_011404818.2         | PREDICTED: methylsterol monooxygenase 1-like            |
| Archaeon1                | archaeon                                  | RYY81668.1             | Fatty acid hydroxylase family protein                   |
| Archaeon2                | archaeon                                  | RYH18502.1             | Fatty acid hydroxylase family protein                   |
| C. merolae               | <i>Cyanidioschyzon merolae</i> strain 10D | XP_005537142.1         | Hypothetical protein, conserved                         |
| C. tobini1               | <i>Chrysochromulina tobini</i>            | KOO21719.1             | c-4 Methylsterol oxidase                                |
| C. tobini2               | <i>Chrysochromulina tobini</i>            | KOO23105.1             | Sterol desaturase                                       |
| Deltaproteobacteria      | <i>Deltaproteobacteria</i> bacterium      | MAA78328.1             | Hypothetical protein CL916_03640                        |
| D. purpureum             | <i>Dictyostelium purpureum</i>            | XP_003291805.1         | Hypothetical protein DICPUDRAFT_156442                  |
| E. affinis               | <i>Eurytemora affinis</i>                 | XP_023341469.1         | Fatty acid hydroxylase domain-containing protein 2-like |
| F. proliferatum          | <i>Fusarium proliferatum</i>              | RKL31181.1             | Hypothetical protein BFJ72_g11198                       |
| H. fermentalgiana        | <i>Hondaea fermentalgiana</i>             | GBG26608.1             | Methylsterol monooxygenase 1-1                          |
| H. sapiens1 <sup>†</sup> | <i>Homo sapiens</i>                       | NP_006736.1            | Methylsterol monooxygenase 1 isoform 1                  |
| H. sapiens2              | <i>Homo sapiens</i>                       | AAH04506.2             | C5orf4 protein, partial                                 |

| <b>Name</b>                | <b>Organism</b>                           | <b>Accession number</b> | <b>Description</b>                                 |
|----------------------------|-------------------------------------------|-------------------------|----------------------------------------------------|
| M. brevicollis             | <i>Monosiga brevicollis</i> MX1           | XP_001747965.1          | Hypothetical protein                               |
| M. commoda                 | <i>Micromonas commoda</i>                 | XP_002508762.1          | Predicted protein                                  |
| O. tauri                   | <i>Ostreococcus tauri</i>                 | XP_003079549.2          | Fatty acid hydroxylase                             |
| P. marinus1                | <i>Perkinsus marinus</i> ATCC 50983       | XP_002782009.1          | Sterol desaturase, putative                        |
| P. marinus2                | <i>Perkinsus marinus</i> ATCC 50983       | XP_002771628.1          | Lathosterol oxidase, putative                      |
| P. olseni                  | <i>Perkinsus olseni</i>                   | KAF4694963.1            | Chromosome 5 4                                     |
| P. tetraurelia1            | <i>Paramecium tetraurelia</i> strain d4-2 | XP_001449651.1          | Hypothetical protein (macronuclear)                |
| P. tetraurelia2            | <i>Paramecium tetraurelia</i> strain d4-2 | XP_001448034.1          | Hypothetical protein (macronuclear)                |
| P. umbilicalis             | <i>Porphyra umbilicalis</i>               | OSX72141.1              | Hypothetical protein BU14_0463s0003                |
| S. cerevisiae <sup>†</sup> | <i>Saccharomyces cerevisiae</i> S288C     | NP_010583.1             | Sphingosine hydroxylase                            |
| S. indica1                 | <i>Serendipita indica</i> DSM 11827       | CCA68111.1              | Related to C-4 methyl sterol oxidase               |
| S. indica2                 | <i>Serendipita indica</i> DSM 11827       | CCA69868.1              | Probable ERG25-C-4 methyl sterol oxidase           |
| S. microadriaticum         | <i>Symbiodinium microadriaticum</i>       | OLP85489.1              | Fatty acid hydroxylase domain-containing protein 2 |
| S. pombe                   | <i>Schizosaccharomyces pombe</i>          | NP_596489.1             | Sphingosine hydroxylase Sur2                       |
| S. rosetta1                | <i>Salpingoeca rosetta</i>                | XP_004992472.1          | Hypothetical protein PTSG_07059                    |
| S. rosetta2                | <i>Salpingoeca rosetta</i>                | XP_004995906.1          | GTP binding protein 4                              |
| T. trahens1                | <i>Thecamonas trahens</i> ATCC 50062      | XP_013758029.1          | 4-Alpha-methyl-sterol C4-methyl-oxidase            |
| T. trahens2                | <i>Thecamonas trahens</i> ATCC 50062      | XP_013761304.1          | Sterol desaturase                                  |

15 <sup>†</sup>Functionally characterized proteins.



16 **Table S7: Correlations between the abundance of *E. huxleyi* and EhV and the concentration of different**  
 17 **GSL species in four bags during a mesocosm experiment.**

|                          | <i>E. huxleyi</i> | hGSL<br>19:3/22:2 | sGSL<br>d18:2/c22:0 | Biomass-<br>associated EhV | vGSL<br>t17:0/h22:0 |
|--------------------------|-------------------|-------------------|---------------------|----------------------------|---------------------|
| <i>E. huxleyi</i>        | 1                 | 0.73              | 0.72                | -0.1                       | -0.01               |
| GSL d18:3/h22:1 (1)      | 0.75              | 0.76              | 0.72                | 0.03                       | 0.1                 |
| hGSL 19:3/22:1           | 0.66              | 0.7               | 0.65                | -0.08                      | -0.01               |
| hGSL 19:3/22:2           | 0.73              | 1                 | 0.86                | 0.07                       | 0.18                |
| GSL d18:3/h22:2 (2)      | 0.65              | 0.97              | 0.81                | 0.15                       | 0.26                |
| sGSL d18:2/c22:0         | 0.72              | 0.86              | 1                   | 0.03                       | 0.16                |
| 374-GSL d19:3/h22:2 (13) | 0.75              | 0.92              | 0.84                | -0.06                      | 0.06                |
| GSL d19:3/h21:1 (3)      | 0.57              | 0.92              | 0.74                | 0.22                       | 0.32                |
| GSL d19:3/h23:2 (4)      | 0.53              | 0.89              | 0.7                 | 0.28                       | 0.34                |
| sGSL d18:1/c22:0         | 0.58              | 0.86              | 0.75                | 0.17                       | 0.3                 |
| 374-GSL d19:3/h22:3 (14) | 0.59              | 0.88              | 0.79                | 0.13                       | 0.25                |
| Biomass-associated EhV   | -0.1              | 0.07              | 0.03                | 1                          | 0.9                 |
| vGSL t17:0/h23:1         | -0.07             | 0.11              | 0.11                | 0.95                       | 0.98                |
| vGSL t17:0/h22:1         | -0.08             | 0.09              | 0.1                 | 0.95                       | 0.98                |
| vGSL t16:0/h22:0         | -0.06             | 0.11              | 0.12                | 0.92                       | 0.99                |
| vGSL t17:0/h24:1         | -0.07             | 0.1               | 0.09                | 0.91                       | 0.97                |
| GSL d18:0/h22:1 (6)      | -0.03             | 0.15              | 0.14                | 0.84                       | 0.96                |
| GSL d18:0/h22:0 (5)      | -0.06             | 0.1               | 0.15                | 0.87                       | 0.94                |
| vGSL t17:0/h23:0         | 0.01              | 0.2               | 0.18                | 0.87                       | 1                   |
| vGSL t17:0/h24:0         | 0                 | 0.21              | 0.18                | 0.87                       | 1                   |
| GSL t18:0/h22:0 (8)      | 0.01              | 0.19              | 0.2                 | 0.85                       | 0.99                |
| vGSL t17:0/h22:0         | -0.01             | 0.18              | 0.16                | 0.9                        | 1                   |
| GSL t18:0/h22:1 (9)      | -0.03             | 0.15              | 0.15                | 0.89                       | 0.99                |
| GSL t18:0/h22:2 (10)     | -0.19             | -0.11             | -0.05               | 0.85                       | 0.69                |

18 Rows and columns are organized based on hierarchal clustering (using the 'R' package 'heatmap'). Pearson  
 19 correlation coefficient ( $r$ ) values are presented using a blue-red color scheme.

20 **Table S8: 'xcms' parameters used for peak picking.**

| Parameter | Value |
|-----------|-------|
| fwhm      | 15    |
| snthresh  | 9     |
| mzdiff    | 0.01  |

21

22 **Table S9: 'xcms' parameters used for peak grouping and alignment.**

| Parameter | Value   |
|-----------|---------|
| bw        | 12      |
| minsamp   | 2       |
| mzwid     | 0.025   |
| plotype   | mdevden |
| smooth    | loess   |
| span      | 0.8     |
| missing   | 2       |
| extra     | 0       |

23

24 **Table S10: Tukey's multiple pairwise comparison tests of GSL species in resistant and susceptible**  
 25 ***E. huxleyi* strains.**

| Group | #  | GSL species              | R-S  | 373-379 | 373-374+EhV | 379-374+EhV | 374-2090 |
|-------|----|--------------------------|------|---------|-------------|-------------|----------|
| A     | 1  | d18:3/h22:1              | 0.00 | 0.90    | 0.97        | 0.21        | 0.32     |
|       | 2  | d18:3/h22:2              | 0.00 | 1.00    | 0.00        | 0.00        | 0.56     |
|       | 3  | d19:3/h21:1              | 0.00 | 0.04    | 0.00        | 0.00        | 0.74     |
|       | 4  | d19:3/h23:2              | 0.00 | 0.00    | 0.00        | 0.00        | 0.73     |
| B     | 5  | d18:0/h22:0              | 0.00 | 0.20    | 0.06        | 0.00        | 1.00     |
|       | 6  | d18:0/h22:1              | 0.00 | 0.00    | 0.00        | 0.00        | 0.74     |
|       | 7  | d18:1/h22:1              | 0.00 | 0.53    | 0.00        | 0.01        | 0.15     |
|       | 8  | t18:0/h22:0              | 0.02 | 0.40    | 0.03        | 0.93        | 0.89     |
|       | 9  | t18:0/h22:1              | 0.00 | 0.77    | 0.03        | 0.00        | 0.99     |
|       | 10 | t18:0/h22:2              | 0.00 | 0.59    | 0.00        | 0.00        | 0.78     |
| C     | 11 | d19:4/h22:1<br>(resGSL)  | 0.00 | 0.00    | 0.52        | 0.00        | 0.73     |
|       | 12 | d19:4/h22:2<br>(resGSL)  | 0.00 | 0.00    | 0.64        | 0.00        | 0.77     |
| D     | 13 | d19:3/h22:2<br>(374-GSL) | 0.01 | 0.00    | 0.00        | 0.00        | 0.00     |
|       | 14 | d19:3/h22:3<br>(374-GSL) | 0.01 | 0.01    | 0.00        | 0.00        | 0.00     |

26 Differences in GSL abundance were tested by a one-way ANOVA followed by Tukey's post-hoc test, comparing:  
 27 (i) the resistant *E. huxleyi* strains 373 and 379 and the susceptible *E. huxleyi* strains 2090 and 374 (with and  
 28 without addition of EhV, 'R-S'); (ii) *E. huxleyi* 373 and 379 (with and without addition of EhV, '373-379');  
 29 (iii) *E. huxleyi* 373 (with and without addition of EhV) and *E. huxleyi* 374 with addition of EhV ('373-374+EhV');  
 30 (iv) *E. huxleyi* 379 (with and without addition of EhV) and *E. huxleyi* 374 with addition of EhV ('379-374+EhV');  
 31 and (v) *E. huxleyi* 374 and 2090 (with and without addition of EhV, '374-2090'). FDR-corrected *p*-values are  
 32 presented for samples at day 2 of the experiment (*n* = 3). Values < 0.01 are marked in light red. R, resistant;  
 33 S, susceptible.

34 **Table S11: Abundance ratios of GSL species in resistant and susceptible *E. huxleyi* strains.**

| Group | #  | GSL species              | R/S  | 373/379 | 373/374+EhV | 379/374+EhV | 374/2090 |
|-------|----|--------------------------|------|---------|-------------|-------------|----------|
| A     | 1  | d18:3/h22:1              | 15   | 0.6     | 0.9         | 1.5         | 3.4      |
|       | 2  | d18:3/h22:2              | 44   | 1.0     | 18          | 19          | 0.4      |
|       | 3  | d19:3/h21:1              | 87   | 1.4     | 76          | 55          | 1.1      |
|       | 4  | d19:3/h23:2              | 1314 | 2.8     | 1649        | 580         | 1.1      |
| B     | 5  | d18:0/h22:0              | 140  | 0.1     | 7.1         | 57          | 1.2      |
|       | 6  | d18:0/h22:1              | 776  | 0.2     | 289         | 1155        | 1.1      |
|       | 7  | d18:1/h22:1              | 65   | 0.2     | 0.3         | 1.4         | 13       |
|       | 8  | t18:0/h22:0              | 6.0  | 0.2     | 0.2         | 0.8         | 2.1      |
|       | 9  | t18:0/h22:1              | 540  | 0.3     | 23          | 79          | 1.5      |
|       | 10 | t18:0/h22:2              | 681  | 0.9     | 469         | 547         | 1.1      |
| C     | 11 | d19:4/h22:1<br>(resGSL)  | 11   | 0.0     | 0.9         | 79          | 1.1      |
|       | 12 | d19:4/h22:2<br>(resGSL)  | 33   | 0.0     | 0.9         | 680         | 1.1      |
| D     | 13 | d19:3/h22:2<br>(374-GSL) | 0.1  | 0.7     | 0           | 0           | 212      |
|       | 14 | d19:3/h22:3<br>(374-GSL) | 0.2  | 0.7     | 0           | 0           | 77       |

35 Ratios were calculated following a one-way ANOVA and Tukey's post-hoc test, based on the mean peak area of  
 36 each sample type at day 2 of the experiment ( $n = 3$ ). Ratios were calculated for: (i) the resistant *E. huxleyi* strains  
 37 373 and 379 and the susceptible *E. huxleyi* strains 2090 and 374 (with and without addition of EhV, 'R/S');  
 38 (ii) *E. huxleyi* 373 and 379 (with and without addition of EhV, '373/379'); (iii) *E. huxleyi* 373 (with and without  
 39 addition of EhV) and *E. huxleyi* 374 with addition of EhV ('373/374+EhV'); (iv) *E. huxleyi* 379 (with and without  
 40 addition of EhV) and *E. huxleyi* 374 with addition of EhV ('379-374/EhV'); and (v) *E. huxleyi* 374 and 2090 (with  
 41 and without addition of EhV, '374/2090'). For further details, see Table S10. R, resistant; S, susceptible.

42 **References**

- 43 1 Sud, M. *et al.* LMSD: Lipid Maps Structure Database. *Nucleic Acids Res.* **35**, D527-  
44 D532 (2007).
- 45 2 Sumner, L. W. *et al.* Proposed minimum reporting standards for chemical analysis  
46 Chemical Analysis Working Group (CAWG) Metabolomics Standards Initiative  
47 (MSI). *Metabolomics* **3**, 211-221 (2007).
- 48 3 Keeling, P. J. *et al.* The Marine Microbial Eukaryote Transcriptome Sequencing Project  
49 (MMETSP): Illuminating the functional diversity of eukaryotic life in the oceans  
50 through transcriptome sequencing. *PLoS Biol.* **12**, e1001889 (2014).
- 51 4 Feldmesser, E., Ben-Dor, S. & Vardi, A. An *Emiliana huxleyi* pan-transcriptome  
52 reveals basal strain specificity in gene expression patterns. *Sci. Rep.* **11**, 20795-20795  
53 (2021).
- 54 5 Rosenwasser, S. *et al.* Rewiring host lipid metabolism by large viruses determines the  
55 fate of *Emiliana huxleyi*, a bloom-forming alga in the ocean. *Plant Cell* **26**, 2689-2707  
56 (2014).
- 57 6 Vardi, A. *et al.* Host-virus dynamics and subcellular controls of cell fate in a natural  
58 coccolithophore population. *Proc. Natl. Acad. Sci. USA* **109**, 19327-19332 (2012).
- 59 7 Fulton, J. M. *et al.* Novel molecular determinants of viral susceptibility and resistance  
60 in the lipidome of *Emiliana huxleyi*. *Environ. Microbiol.* **16**, 1137-1149 (2014).
- 61 8 Ziv, C. *et al.* Viral serine palmitoyltransferase induces metabolic switch in sphingolipid  
62 biosynthesis and is required for infection of a marine alga. *Proc. Natl. Acad. Sci. USA*  
63 **113**, E1907-E1916 (2016).
